# Supplementary material for: A global checklist of the Bombycoidea (Insecta: Lepidoptera)
Source: Biodivers Data J. 2018 Feb 12;(6):e22236. doi: 10.3897/BDJ.6.e22236 (PMC5904559; doi:10.3897/BDJ.6.e22236)
Supplement: Supplementary material 1 — Global Bombycoidea checklist [file bdj-06-e22236-s001.xlsx]

## Sheet: Bombycoids_list (all species ta
Family	Subfamily	Tribe	Subtribe	Family_synonyms	Genus	Subgenus	Genus_synonyms	Species	Subspecies	Species synonyms	Author	Year	Original comb?	Last edited date	Nomenclatural notes	Taxonomic status change	Sphingidae Taxonomic Inventory URL
Anthelidae											Turner	1904	-	2017-04-28
Anthelidae	Anthelinae										Turner	1904	-	2017-04-28
Anthelidae	Anthelinae				Anthela						Walker	1855	-	2017-04-28
Anthelidae	Anthelinae				Anthela		Arnissa				Walker	1869	-	2017-04-28
Anthelidae	Anthelinae				Anthela		Baeodromus				Herrich-Schäffer	[1858]	-	2017-05-18	nomen nudum
Anthelidae	Anthelinae				Anthela		Colussa				Walker	1860	-	2017-04-28
Anthelidae	Anthelinae				Anthela		Cycethra				Bethune-Baker	1904	-	2017-05-22	junior homonym
Anthelidae	Anthelinae				Anthela		Darala				Walker	1855	-	2017-04-28
Anthelidae	Anthelinae				Anthela		Eulophocampe				Scott	1893	-	2017-05-18	nomen nudum
Anthelidae	Anthelinae				Anthela		Laranda				Herrich-Schäffer	[1858]	-	2017-05-18	nomen nudum
Anthelidae	Anthelinae				Anthela		Newmania				Swinhoe	1892	-	2017-04-28
Anthelidae	Anthelinae				Anthela		Ommatoptera				Herrich-Schäffer	1855	-	2017-04-28
Anthelidae	Anthelinae				Anthela		Pseudodreata				Bethune-Baker	1904	-	05/22/2017	nomen novum
Anthelidae	Anthelinae				Anthela			achromata			Turner	1904	Y	2017-04-28
Anthelidae	Anthelinae				Anthela			acuta			Walker	1855	N	2017-04-28
Anthelidae	Anthelinae				Anthela			acuta		conspersa	Walker	1855	N	2017-04-28
Anthelidae	Anthelinae				Anthela			acuta		delineata	Walker	1865	N	2017-04-28
Anthelidae	Anthelinae				Anthela			acuta		excisa	Walker	1855	N	2017-04-28
Anthelidae	Anthelinae				Anthela			acuta		plana	Walker	1855	N	2017-04-28
Anthelidae	Anthelinae				Anthela			acuta		potentaria	Walker	1863	N	2017-04-28
Anthelidae	Anthelinae				Anthela			acuta		quadriplaga	Walker	1862	N	2017-04-28
Anthelidae	Anthelinae				Anthela			acuta		simplex	Walker	1855	N	2017-05-18	junior homonym
Anthelidae	Anthelinae				Anthela			addita			Walker	1865	N	2017-05-22
Anthelidae	Anthelinae				Anthela			addita		pyrrhica	Turner	1921	Y	2017-04-28
Anthelidae	Anthelinae				Anthela			addita		simplex	Walker	1869	N	2017-04-28
Anthelidae	Anthelinae				Anthela			addita		vinosa	Rosenstock	1885	N	2017-04-28
Anthelidae	Anthelinae				Anthela			adriana			Swinhoe	1902	N	2017-04-28
Anthelidae	Anthelinae				Anthela			allocota			Turner	1921	Y	2017-04-28
Anthelidae	Anthelinae				Anthela			angiana			Joicey, Noakes & Talbot	1915	N	2017-05-22
Anthelidae	Anthelinae				Anthela			ariprepes			Turner	1921	Y	2017-04-28
Anthelidae	Anthelinae				Anthela			aroa			Bethune-Baker	1904	N	2017-05-22
Anthelidae	Anthelinae				Anthela			asciscens			Lucas, T.P.	1891	N	2017-04-28
Anthelidae	Anthelinae				Anthela			asciscens		tritonea	Swinhoe	1903	Y	2017-04-28
Anthelidae	Anthelinae				Anthela			astata			Turner	1926	Y	2017-04-28
Anthelidae	Anthelinae				Anthela			astata		cinerascens	Grünberg	1914	N	2017-05-18	junior homonym
Anthelidae	Anthelinae				Anthela			asterias			Meyrick	1891	N	2017-04-28
Anthelidae	Anthelinae				Anthela			asterias		niphomacula	Lower	1905	Y	2017-04-28
Anthelidae	Anthelinae				Anthela			asterias		uniformis	Swinhoe	1892	N	2017-04-28
Anthelidae	Anthelinae				Anthela			barnardi			Turner	1922	Y	2017-04-28
Anthelidae	Anthelinae				Anthela			basigera			Walker	1865	N	2017-04-28
Anthelidae	Anthelinae				Anthela			basigera		undulata	Felder, C. & Felder, R.	1874	N	2017-05-22
Anthelidae	Anthelinae				Anthela			brunneilinea			Hulstaert	1924	Y	2017-04-28
Anthelidae	Anthelinae				Anthela			callileuca			Turner	1922	Y	2017-04-28
Anthelidae	Anthelinae				Anthela			callispila			Lower	1905	Y	2017-04-28
Anthelidae	Anthelinae				Anthela			callixantha			Lower	1902	N	2017-04-28
Anthelidae	Anthelinae				Anthela			callixantha		flavala	Swinhoe	1903	Y	2017-04-28
Anthelidae	Anthelinae				Anthela			canescens			Walker	1855	N	2017-04-28
Anthelidae	Anthelinae				Anthela			canescens		latifera	Walker	1862	N	2017-04-28
Anthelidae	Anthelinae				Anthela			canescens		moretonensis	Strand	1925	Y	2017-04-28
Anthelidae	Anthelinae				Anthela			canescens		scortea	Lucas, T.P.	1891	N	2017-04-28
Anthelidae	Anthelinae				Anthela			canescens		succinea	Lucas, T.P.	1891	N	2017-04-28
Anthelidae	Anthelinae				Anthela			canescens		tintinarra	Tepper	1890	N	2017-04-28
Anthelidae	Anthelinae				Anthela			canescens		uvaria	Walker	1866	N	2017-04-28
Anthelidae	Anthelinae				Anthela			charon			Bethune-Baker	1908	Y	2017-04-28
Anthelidae	Anthelinae				Anthela			charon		kebea	Strand	1929	Y	2017-04-28
Anthelidae	Anthelinae				Anthela			cinerascens			Walker	1855	N	2017-04-28
Anthelidae	Anthelinae				Anthela			cinerascens		cervinella	Strand	1929	Y	2017-04-28
Anthelidae	Anthelinae				Anthela			cinerascens		rufifascia	Walker	1865	N	2017-04-28
Anthelidae	Anthelinae				Anthela			clementi			Swinhoe	1902	N	2017-04-28
Anthelidae	Anthelinae				Anthela			cnecias			Turner	1921	Y	2017-04-28
Anthelidae	Anthelinae				Anthela			cnecias		tasmaniensis	Strand	1929	Y	2017-04-28
Anthelidae	Anthelinae				Anthela			connexa			Walker	1855	N	2017-04-28
Anthelidae	Anthelinae				Anthela			connexa		fervens	Walker	1855	N	2017-05-22
Anthelidae	Anthelinae				Anthela			connexa		zonata	Felder, C. & Felder, R.	1874	N	2017-09-14
Anthelidae	Anthelinae				Anthela			decolor			Turner	1939	Y	2017-04-28
Anthelidae	Anthelinae				Anthela			deficiens			Walker	1865	N	2017-04-28
Anthelidae	Anthelinae				Anthela			denticulata			Newman	1856	N	2017-04-28
Anthelidae	Anthelinae				Anthela			directa			Walker	1862	N	2017-05-18	incertae sedis
Anthelidae	Anthelinae				Anthela			ekeikei			Bethune-Baker	1904	Y	2017-04-28
Anthelidae	Anthelinae				Anthela			ekeikei		ekeikei	Bethune-Baker	1904	N	2017-05-22	junior homonym
Anthelidae	Anthelinae				Anthela			ekeikei		mediana	Strand	1929	Y	2017-04-28
Anthelidae	Anthelinae				Anthela			ekeikei		obsoletipicta	Strand	1929	Y	2017-04-28
Anthelidae	Anthelinae				Anthela			ekeikei		pupillifera	Strand	1929	Y	2017-04-28
Anthelidae	Anthelinae				Anthela			euryphrica			Turner	1936	Y	2017-04-28
Anthelidae	Anthelinae				Anthela			excellens			Walker	1855	N	2017-04-28
Anthelidae	Anthelinae				Anthela			excellens		caniceps	Walker	1862	N	2017-04-28
Anthelidae	Anthelinae				Anthela			excellens		integra	Walker	1855	N	2017-04-28
Anthelidae	Anthelinae				Anthela			exoleta			Swinhoe	1892	N	2017-04-28
Anthelidae	Anthelinae				Anthela			exoleta		figlina	Swinhoe	1902	N	2017-04-28
Anthelidae	Anthelinae				Anthela			exoleta		glauerti	Turner	1939	Y	2017-04-28
Anthelidae	Anthelinae				Anthela			ferruginosa			Walker	1855	Y	2017-04-28
Anthelidae	Anthelinae				Anthela			ferruginosa		guttifascia	Strand	1925	Y	2017-04-28
Anthelidae	Anthelinae				Anthela			ferruginosa		minuta	Swinhoe	1892	N	2017-04-28
Anthelidae	Anthelinae				Anthela			ferruginosa		parva	Walker	1855	N	2017-04-28
Anthelidae	Anthelinae				Anthela			ferruginosa		walkeri	Strand	1925	Y	2017-04-28
Anthelidae	Anthelinae				Anthela			guenei			Newman	1856	N	2017-04-28
Anthelidae	Anthelinae				Anthela			habroptila			Turner	1921	Y	2017-04-28
Anthelidae	Anthelinae				Anthela			heliopa			Lower	1902	N	2017-04-28
Anthelidae	Anthelinae				Anthela			heliopa		prionodes	Turner	1932	Y	2017-04-28
Anthelidae	Anthelinae				Anthela			hyperythra			Turner	1921	Y	2017-04-28
Anthelidae	Anthelinae				Anthela			inconstans			Joicey, Noakes & Talbot	1915	N	2017-05-22
Anthelidae	Anthelinae				Anthela			inornata			Walker	1855	N	2017-04-28
Anthelidae	Anthelinae				Anthela			inornata		carneotincta	Swinhoe	1903	Y	2017-05-22
Anthelidae	Anthelinae				Anthela			inornata		complens	Swinhoe	1892	N	2017-05-22
Anthelidae	Anthelinae				Anthela			inornata		crenulata	Swinhoe	1903	Y	2017-05-22
Anthelidae	Anthelinae				Anthela			julia			Hulstaert	1924	Y	2017-04-28
Anthelidae	Anthelinae				Anthela			laeta			Grünberg	1914	N	2017-05-22
Anthelidae	Anthelinae				Anthela			limonea			Butler	1874	N	2017-04-28
Anthelidae	Anthelinae				Anthela			linearis			Lucas, T.P.	1891	N	2017-05-22	incertae sedis
Anthelidae	Anthelinae				Anthela			macrota			Lower	1892	N	2017-05-22	nomen nudum
Anthelidae	Anthelinae				Anthela			maculosa			Lucas, T.P.	1898	N	2017-05-18	incertae sedis
Anthelidae	Anthelinae				Anthela			neurospasta			Turner	1902	Y	2017-04-28
Anthelidae	Anthelinae				Anthela			neurospasta		linopepla	Turner	1921	Y	2017-04-28
Anthelidae	Anthelinae				Anthela			neurospasta		ochroneura	Turner	1915	Y	2017-04-28
Anthelidae	Anthelinae				Anthela			nicothoe			Boisduval	1832	N	2017-04-28
Anthelidae	Anthelinae				Anthela			nicothoe		adusta	Walker	1855	N	2017-04-28
Anthelidae	Anthelinae				Anthela			nicothoe		australasiae	Herrich-Schäffer	1855	N	2017-04-28
Anthelidae	Anthelinae				Anthela			nicothoe		censors	Walker	1865	N	2017-04-28
Anthelidae	Anthelinae				Anthela			nicothoe		consors	Walker	1866	N	2017-05-18	unjustified emendation
Anthelidae	Anthelinae				Anthela			nicothoe		eucalypti	Herrich-Schäffer	[1858]	N	2017-05-18	nomen nudum
Anthelidae	Anthelinae				Anthela			ocellata			Walker	1855	N	2017-04-28
Anthelidae	Anthelinae				Anthela			ocellata		dama	Strand	1929	Y	2017-05-22
Anthelidae	Anthelinae				Anthela			ocellata		nigristigma	Fawcett	1917	Y	2017-05-22
Anthelidae	Anthelinae				Anthela			ocellata		symphona	Turner	1904	Y	2017-05-22
Anthelidae	Anthelinae				Anthela			ocellata		tetrophthalma	Herrich-Schäffer	1856	N	2017-05-22
Anthelidae	Anthelinae				Anthela			ochroptera			Lower	1892	N	2017-04-28
Anthelidae	Anthelinae				Anthela			ochroptera		psammochroa	Lower	1908	N	2017-04-28
Anthelidae	Anthelinae				Anthela			odontogrammata			Joicey & Talbot	1917	N	2017-05-22
Anthelidae	Anthelinae				Anthela			oressarcha			Turner	1921	Y	2017-04-28
Anthelidae	Anthelinae				Anthela			ostra			Swinhoe	1903	Y	2017-04-28
Anthelidae	Anthelinae				Anthela			ostra		chrysocrossa	Turner	1915	Y	2017-04-28
Anthelidae	Anthelinae				Anthela			phaeodesma			Turner	1921	Y	2017-04-28
Anthelidae	Anthelinae				Anthela			phaeodesma		intermedia	Hulstaert	1924	Y	2017-04-28
Anthelidae	Anthelinae				Anthela			phoenicias			Turner	1902	Y	2017-04-28
Anthelidae	Anthelinae				Anthela			phoenicias		aspilota	Turner	1902	Y	2017-04-28
Anthelidae	Anthelinae				Anthela			postica			Walker	1855	N	2017-04-28
Anthelidae	Anthelinae				Anthela			postica		callicesta	Turner	1924	Y	2017-04-28
Anthelidae	Anthelinae				Anthela			protocentra			Meyrick	1891	N	2017-04-28
Anthelidae	Anthelinae				Anthela			pudica			Swinhoe	1902	N	2017-04-28
Anthelidae	Anthelinae				Anthela			pyrrhobaphes			Turner	1926	Y	2017-05-22
Anthelidae	Anthelinae				Anthela			reltoni			Lucas, T.P.	1895	N	2017-04-28
Anthelidae	Anthelinae				Anthela			reltoni		pyromacula	Lower	1905	Y	2017-04-28
Anthelidae	Anthelinae				Anthela			repleta			Walker	1855	N	2017-04-28
Anthelidae	Anthelinae				Anthela			repleta		diophthalma	Herrich-Schäffer	[1856]	N	2017-04-28
Anthelidae	Anthelinae				Anthela			repleta		repletana	Strand	1929	Y	2017-04-28
Anthelidae	Anthelinae				Anthela			roberi			Niepelt	1934	Y	2017-04-28
Anthelidae	Anthelinae				Anthela			rubeola			Felder, R.	1874	N	2017-05-22
Anthelidae	Anthelinae				Anthela			rubeola		haemoptera	Lower	1893	N	2017-04-28
Anthelidae	Anthelinae				Anthela			rubicunda			Swinhoe	1902	N	2017-04-28
Anthelidae	Anthelinae				Anthela			rubriscripta			Lucas, T.P.	1891	N	2017-05-18	incertae sedis
Anthelidae	Anthelinae				Anthela			strigata			Bethune-Baker	1904	N	2017-06-16
Anthelidae	Anthelinae				Anthela			stygiana			Butler	1882	N	2017-04-28
Anthelidae	Anthelinae				Anthela			stygiana		magnifica	Lucas, T.P.	1891	N	2017-04-28
Anthelidae	Anthelinae				Anthela			subfalcata			Walker	1855	N	2017-04-28
Anthelidae	Anthelinae				Anthela			subfalcata		ferruginea	Walker	1855	N	2017-04-28
Anthelidae	Anthelinae				Anthela			subfalcata		myrti	Herrich-Schäffer	[1858]	N	2017-05-18	nomen nudum
Anthelidae	Anthelinae				Anthela			subfalcata		phaeozona	Turner	1926	Y	2017-04-28
Anthelidae	Anthelinae				Anthela			tetraphrica			Turner	1921	Y	2017-04-28
Anthelidae	Anthelinae				Anthela			trisecta			Lucas, T.P.	1898	N	2017-05-18	incertae sedis
Anthelidae	Anthelinae				Anthela			unisigna			Swinhoe	1903	Y	2017-04-28
Anthelidae	Anthelinae				Anthela			varia			Walker	1855	N	2017-04-28
Anthelidae	Anthelinae				Anthela			varia		amoena	Scott	1893	N	2017-05-18	nomen nudum
Anthelidae	Anthelinae				Anthela			varia		hamata	Walker	1855	N	2017-04-28
Anthelidae	Anthelinae				Anthela			varia		odenestaria	Turner	1860	N	2017-04-28
Anthelidae	Anthelinae				Anthela			varia		pinguis	Walker	1865	N	2017-04-28
Anthelidae	Anthelinae				Anthela			virescens			Turner	1939	Y	2017-04-28
Anthelidae	Anthelinae				Anthela			xantharcha			Meyrick	1891	N	2017-04-28
Anthelidae	Anthelinae				Anthela			xanthocera			Turner	1922	Y	2017-04-28
Anthelidae	Anthelinae				Anthela_auctorum						-	-	-	2017-04-28
Anthelidae	Anthelinae				Anthela_auctorum			lineosa			Walker	1862	N	04/28/2017
Anthelidae	Anthelinae				Anthela_auctorum			xanthobapta			Lower	????	?	04/28/2017
Anthelidae	Anthelinae				Chelepteryx						Gray	[1835]	-	2017-04-28
Anthelidae	Anthelinae				Chelepteryx		Festra				Wallengren	1858	-	2017-04-28
Anthelidae	Anthelinae				Chelepteryx		Megethna				Walker	1855	-	2017-04-28
Anthelidae	Anthelinae				Chelepteryx			chalepteryx			Felder, R.	1874	N	2017-05-22
Anthelidae	Anthelinae				Chelepteryx			chalepteryx		cupreotincta	Lucas, T.P.	1892	N	2017-04-28
Anthelidae	Anthelinae				Chelepteryx			chalepteryx		felderi	Turner	1904	Y	2017-05-18	unnecessary replacement name
Anthelidae	Anthelinae				Chelepteryx			chalepteryx		kochii	Koch	1872	Y	2017-05-18	nomen nudum
Anthelidae	Anthelinae				Chelepteryx			collesi			Gray	[1835]	Y	2017-04-28
Anthelidae	Anthelinae				Chelepteryx			collesi		affabricata	Wallengren	1858	N	2017-04-28
Anthelidae	Anthelinae				Chelepteryx			collesi		laplacei	Feisthamel	1839	N	2017-04-28
Anthelidae	Anthelinae				Chenuala						Swinhoe	1892	-	2017-04-28
Anthelidae	Anthelinae				Chenuala			heliaspis			Meyrick	1891	N	2017-04-28
Anthelidae	Anthelinae				Chenuala			heliaspis		epicrypha	Swinhoe	1905	N	2017-04-28
Anthelidae	Anthelinae				Chenuala			heliaspis		expolitus	Scott	1892	N	2017-05-18	nomen nudum
Anthelidae	Anthelinae				Chenuala			heliaspis		rufa	Swinhoe	1892	Y	2017-04-28
Anthelidae	Anthelinae				Corticomis						van Eecke	1924	-	2017-04-28
Anthelidae	Anthelinae				Corticomis			eupterotioides			van Eecke	1924	Y	2017-04-28
Anthelidae	Anthelinae				Corticomis			marmorea			van Eecke	1924	Y	2017-04-28
Anthelidae	Anthelinae				Nataxa						Walker	1855	-	2017-04-28
Anthelidae	Anthelinae				Nataxa		Aproscepta				Turner	1944	-	2017-04-28
Anthelidae	Anthelinae				Nataxa		Dicreagra				Felder, R.	1874	-	2017-05-22
Anthelidae	Anthelinae				Nataxa			amblopis			Turner	1944	N	2017-04-28
Anthelidae	Anthelinae				Nataxa			flavescens			Walker	1855	N	2017-04-28
Anthelidae	Anthelinae				Nataxa			flavescens		flavifascia	Walker	1855	Y	2017-04-28
Anthelidae	Anthelinae				Nataxa			flavescens		ochrocephala	Felder, R.	1874	N	2017-05-22
Anthelidae	Anthelinae				Nataxa			flavescens		rubida	Walker	1865	Y	2017-04-28
Anthelidae	Anthelinae				Omphaliodes						Felder, R.	1874	-	2017-05-22
Anthelidae	Anthelinae				Omphaliodes		Aprosita				Turner	1914	-	2017-05-22
Anthelidae	Anthelinae				Omphaliodes			obscura			Walker	1855	N	2017-04-28
Anthelidae	Anthelinae				Omphaliodes			obscura		nana	Felder, R.	1874	Y	2017-05-22
Anthelidae	Anthelinae				Omphaliodes			obscura		ulothrix	Turner	1914	N	2017-04-28
Anthelidae	Anthelinae				Pterolocera						Walker	1855	-	2017-04-28
Anthelidae	Anthelinae				Pterolocera			amplicornis			Walker	1855	Y	2017-04-28
Anthelidae	Anthelinae				Pterolocera			elizabetha			White	1841	N	2017-04-28
Anthelidae	Anthelinae				Pterolocera			ferruginea			Strand	1925	Y	2017-04-28
Anthelidae	Anthelinae				Pterolocera			ferrugineofusca			Strand	1925	Y	2017-04-28
Anthelidae	Anthelinae				Pterolocera			ferrugineofusca		similis	Swinhoe	1922	Y	2017-05-18	nomen nudum
Anthelidae	Anthelinae				Pterolocera			ferrugineofusca		similis	Hulstaert	1928	Y	2017-05-18	infrasubspecific
Anthelidae	Anthelinae				Pterolocera			ferrugineofusca		similis	Bryk	1934	Y	2017-05-18	nomen nudum
Anthelidae	Anthelinae				Pterolocera			insignis			Herrich-Schäffer	[1856]	N	2017-04-28
Anthelidae	Anthelinae				Pterolocera			isogama			Turner	1931	Y	2017-04-28
Anthelidae	Anthelinae				Pterolocera			leucocera			Turner	1921	N	2017-04-28
Anthelidae	Anthelinae				Pterolocera			rubescens			Walker	1865	N	2017-04-28
Anthelidae	Munychryiinae										Common & McFarland	1970	-	2017-04-28
Anthelidae	Munychryiinae				Gephyroneura						Turner	1920	-	2017-04-28
Anthelidae	Munychryiinae				Gephyroneura			cosmia			Turner	1921	Y	2017-04-28
Anthelidae	Munychryiinae				Munychryia						Walker	1865	-	2017-04-28
Anthelidae	Munychryiinae				Munychryia			periclyta			Common & McFarland	1970	Y	2017-04-28
Anthelidae	Munychryiinae				Munychryia			senicula			Walker	1865	Y	2017-04-28
Anthelidae	Munychryiinae				Munychryia			senicula		nyssiata	Felder, R. & Rogenhofer	1875	N	2017-04-28
Apatelodidae											Neumoegen & Dyar	1894	-	04/28/2017
Apatelodidae				Zanolidae							McDunnough	1938	-	2017-06-12
Apatelodidae					Apatelodes						Packard	1864	-	2017-06-01	nomen novum
Apatelodidae					Apatelodes		Astasia				Harris	1841	-	2017-05-18	junior homonym
Apatelodidae					Apatelodes		Hygrochroa				Hübner	[1823]	-	2017-05-18	nomen oblitum
Apatelodidae					Apatelodes			adrastia			Druce	1887	Y	2017-04-28
Apatelodidae					Apatelodes			adrastia		diffidens	Edwards, H.	1887	Y	2017-04-28
Apatelodidae					Apatelodes			albipunctata			Druce	1898	Y	2017-04-28
Apatelodidae					Apatelodes			amaryllis			Dyar	1907	Y	2017-04-28
Apatelodidae					Apatelodes			anna			Schaus	1905	N	2017-04-28
Apatelodidae					Apatelodes			ardeola			Druce	1887	Y	2017-04-28
Apatelodidae					Apatelodes			ardeola	mediana		Schaus	1900	N	2017-04-28
Apatelodidae					Apatelodes			ardeola	vitrea		Schaus	1910	Y	2017-04-28
Apatelodidae					Apatelodes			auduboni			Wagner & Knudson	2014	Y	2017-04-28
Apatelodidae					Apatelodes			banepa			Druce	1904	Y	2017-04-28
Apatelodidae					Apatelodes			batima			Dyar	1912	Y	2017-04-28
Apatelodidae					Apatelodes			beneluzi			Herbin	2015	Y	2017-04-28
Apatelodidae					Apatelodes			brueckneri			Draudt	1929	Y	2017-04-28
Apatelodidae					Apatelodes			castanea			Jones	1908	Y	2017-04-28
Apatelodidae					Apatelodes			cerradensis			Herbin & Mielke	[2018]	Y	2018-01-25
Apatelodidae					Apatelodes			cerrita			Draudt	1929	Y	2017-04-28
Apatelodidae					Apatelodes			cirna			Druce	1897	Y	2017-04-28
Apatelodidae					Apatelodes			combi			Herbin	2015	Y	2017-04-28
Apatelodidae					Apatelodes			concerpta			Draudt	1929	Y	2017-04-28
Apatelodidae					Apatelodes			concerpta	fucosa		Draudt	1929	Y	2017-04-28
Apatelodidae					Apatelodes			corema			Schaus	1896	Y	2017-04-28
Apatelodidae					Apatelodes			costaricensis			Draudt	1929	N	2017-04-28
Apatelodidae					Apatelodes			damora			Schaus	1939	Y	2017-04-28
Apatelodidae					Apatelodes			datanoides			Draudt	1929	Y	2017-04-28
Apatelodidae					Apatelodes			diana			Dognin	1916	Y	2017-04-28
Apatelodidae					Apatelodes			dianita			Dognin	1921	Y	2017-04-28
Apatelodidae					Apatelodes			doramia			Dyar	1912	Y	2017-04-28
Apatelodidae					Apatelodes			dorrace			Herbin & Mielke	[2018]	Y	2018-01-25
Apatelodidae					Apatelodes			ennomoides			Walker	1865	N	2017-04-28
Apatelodidae					Apatelodes			erotina			Schaus	1939	Y	2017-04-28
Apatelodidae					Apatelodes			erubescens			Draudt	1929	Y	2017-04-28
Apatelodidae					Apatelodes			erubescens		telano	Schaus	1939	N	2017-04-28
Apatelodidae					Apatelodes			faustinoi			Herbin & Monzón	2015	Y	2017-04-28
Apatelodidae					Apatelodes			feiranovensis			Herbin & Mielke	[2018]	Y	2018-01-25
Apatelodidae					Apatelodes			felisi			Herbin	2015	Y	2017-04-28
Apatelodidae					Apatelodes			firmiana			Stoll	1782	N	2017-04-28
Apatelodidae					Apatelodes			firmianoides			Herbin & Mielke	[2018]	Y	2018-01-25
Apatelodidae					Apatelodes			florisa			Schaus	1939	Y	2017-04-28
Apatelodidae					Apatelodes			garleppi			Draudt	1929	Y	2017-05-19
Apatelodidae					Apatelodes			gaveta			Dognin	1894	N	2017-04-28
Apatelodidae					Apatelodes			gladys			Dyar	1918	Y	2017-04-28
Apatelodidae					Apatelodes			guyanensis			Herbin	2015	Y	2017-04-28
Apatelodidae					Apatelodes			heptaloba			Druce	1887	Y	2017-04-28
Apatelodidae					Apatelodes			heptaloba		bunca	Dyar	1912	Y	2017-04-28
Apatelodidae					Apatelodes			hierax			Dognin	1924	Y	2017-04-28
Apatelodidae					Apatelodes			horina			Schaus	1920	Y	2017-05-19
Apatelodidae					Apatelodes			ilia			Dognin	1916	Y	2017-04-28
Apatelodidae					Apatelodes			imparata			Dognin	1907	Y	2017-04-28
Apatelodidae					Apatelodes			infesta			Dognin	1922	N	2017-04-28
Apatelodidae					Apatelodes			inviolata			Dognin	1911	Y	2017-04-28
Apatelodidae					Apatelodes			jessica			Dyar	1926	Y	2017-04-28
Apatelodidae					Apatelodes			jessica	floramia		Dyar	1926	Y	2017-04-28
Apatelodidae					Apatelodes			jessica	maudamia		Dyar	1926	Y	2017-04-28
Apatelodidae					Apatelodes			kohlli			Herbin	2015	Y	2017-04-28
Apatelodidae					Apatelodes			kotzschi			Draudt	1929	Y	2017-04-28
Apatelodidae					Apatelodes			lacetania			Druce	1898	Y	2017-04-28
Apatelodidae					Apatelodes			lacetania		hiantha	Dyar	1912	Y	2017-04-28
Apatelodidae					Apatelodes			lapitha			Druce	1900	Y	2017-04-28
Apatelodidae					Apatelodes			lepida			Schaus	1905	N	2017-04-28
Apatelodidae					Apatelodes			lescamia			Dyar	1912	Y	2017-04-28
Apatelodidae					Apatelodes			lilacina			Jones	1908	Y	2017-05-19
Apatelodidae					Apatelodes			luciano			Piñas Rubio	2008	Y	2017-09-04	nomen nudum
Apatelodidae					Apatelodes			mehida			Druce	1904	Y	2017-04-28
Apatelodidae					Apatelodes			merlona			Schaus	1939	Y	2017-04-28
Apatelodidae					Apatelodes			milma			Dyar	1912	Y	2017-04-28
Apatelodidae					Apatelodes			mineti			Herbin & Mielke	[2018]	Y	2018-01-25
Apatelodidae					Apatelodes			moresca			Schaus	1905	N	2017-04-28
Apatelodidae					Apatelodes			narda			Schaus	1900	Y	2017-04-28
Apatelodidae					Apatelodes			nina			Stoll	1780	N	2017-04-28
Apatelodidae					Apatelodes			nina		bombycina	Felder, C. & Felder, R.	1874	N	2017-04-28
Apatelodidae					Apatelodes			nina		martia	Stoll	1780	N	2017-04-28
Apatelodidae					Apatelodes			nogales			Piñas Rubio	2008	Y	2017-09-04	nomen nudum
Apatelodidae					Apatelodes			nouraguesensis			Herbin	2015	Y	2017-04-28
Apatelodidae					Apatelodes			olaus			Schaus	1924	Y	2017-04-28
Apatelodidae					Apatelodes			onorei			Piñas Rubio	2008	Y	2017-09-04	nomen nudum
Apatelodidae					Apatelodes			palma			Druce	1900	Y	2017-04-28
Apatelodidae					Apatelodes			pandara			Druce	1898	Y	2017-04-28
Apatelodidae					Apatelodes			pandara	romani		Bryk	1953	Y	2017-04-28
Apatelodidae					Apatelodes			pandarioides			Schaus	1905	Y	2017-04-28
Apatelodidae					Apatelodes			paraguayana			Schaus	1927	Y	2017-04-28
Apatelodidae					Apatelodes			paratima			Schaus	1910	Y	2017-04-28
Apatelodidae					Apatelodes			parvula			Schaus	1894	Y	2017-04-28
Apatelodidae					Apatelodes			patagai			Herbin	2015	Y	2017-04-28
Apatelodidae					Apatelodes			paulista			Jones	1908	Y	2017-04-28
Apatelodidae					Apatelodes			penitente			Herbin & Mielke	[2018]	Y	2018-01-25
Apatelodidae					Apatelodes			pertuisa			Dognin	1916	N	2017-04-28
Apatelodidae					Apatelodes			pervicax			Dognin	1911	N	2017-04-28
Apatelodidae					Apatelodes			pithala			Dognin	1921	Y	2017-04-28
Apatelodidae					Apatelodes			princeps			Dognin	1911	Y	2017-04-28
Apatelodidae					Apatelodes			pudefacta			Dyar	1904	Y	2017-04-28
Apatelodidae					Apatelodes			pudefacta		uvada	Barnes	1904	Y	2017-04-28
Apatelodidae					Apatelodes			quadrata			Jones	1908	Y	2017-04-28
Apatelodidae					Apatelodes			radapan			Herbin & Mielke	[2018]	Y	2018-01-25
Apatelodidae					Apatelodes			roura			Herbin	2015	Y	2017-04-28
Apatelodidae					Apatelodes			sadisma			Dyar	1918	Y	2017-04-28
Apatelodidae					Apatelodes			schreiteri			Schaus	1924	Y	2017-05-19
Apatelodidae					Apatelodes			schusteri			Herbin & Monzón	2015	Y	2017-04-28
Apatelodidae					Apatelodes			sericea			Schaus	1895	Y	2017-04-28
Apatelodidae					Apatelodes			sericea		erecta	Dognin	1916	Y	2017-04-28
Apatelodidae					Apatelodes			signata			Druce	1904	Y	2017-04-28
Apatelodidae					Apatelodes			singularis			Butler	1881	N	2017-04-28
Apatelodidae					Apatelodes			striata			Druce	1906	Y	2017-04-28
Apatelodidae					Apatelodes			sublunulata			Schaus	1920	Y	2017-04-28
Apatelodidae					Apatelodes			taperinha			Dognin	1922	N	2017-04-28
Apatelodidae					Apatelodes			thinaha			Draudt	1929	Y	2017-04-28
Apatelodidae					Apatelodes			torrefacta			Smith, J.E.	1797	N	2017-04-28
Apatelodidae					Apatelodes			torrefacta		floridana	Edwards, H.	1886	Y	2017-04-28
Apatelodidae					Apatelodes			tropea			Schaus	1896	N	2017-04-28
Apatelodidae					Apatelodes			tuisa			Schaus	1910	N	2017-04-28
Apatelodidae					Apatelodes			turrialba			Schaus	1910	Y	2017-04-28
Apatelodidae					Apatelodes			velutina			Schaus	1895	Y	2017-04-28
Apatelodidae					Apatelodes			verena			Druce	1898	Y	2017-04-28
Apatelodidae					Apatelodes			vistana			Schaus	1939	Y	2017-04-28
Apatelodidae					Apatelodes			xanthapex			Draudt	1929	Y	2017-04-28
Apatelodidae					Apatelodes			zikani			Draudt	1929	Y	2017-04-28
Apatelodidae					Carnotena						Walker	1865	-	2017-04-28
Apatelodidae					Carnotena		Microplastis				Felder, C. & Felder, R.	1874	-	2017-04-28
Apatelodidae					Carnotena			xanthiata			Walker	1865	Y	2017-04-28
Apatelodidae					Carnotena			xanthiata		configurata	Felder, C. & Felder, R.	1874	N	2017-04-28
Apatelodidae					Carnotena			xanthiata		perlineata	Walker	1862	N	2017-04-28
Apatelodidae					Drepatelodes						Draudt	1929	-	2017-04-28
Apatelodidae					Drepatelodes			friburgensis			Schaus	1924	N	2017-04-28
Apatelodidae					Drepatelodes			landolti			Herbin & Monzón	2015	Y	2017-04-28
Apatelodidae					Drepatelodes			ostenta			Schaus	1905	N	2017-04-28
Apatelodidae					Drepatelodes			quadrilineata			Schaus	1920	N	2017-04-28
Apatelodidae					Drepatelodes			tanais			Druce	1898	N	2017-04-28
Apatelodidae					Drepatelodes			trilineata			Dognin	1912	N	2017-04-28
Apatelodidae					Drepatelodes			umbrillinea			Schaus	1905	N	2017-04-28
Apatelodidae					Drepatelodes			zacki			Herbin & Monzón	2015	Y	2017-04-28
Apatelodidae					Ephoria						Herrich-Schäffer	1855	-	2017-04-28
Apatelodidae					Ephoria		Colabata				Walker	1856	-	04/28/2017
Apatelodidae					Ephoria			dora			Schaus	1896	N	2017-04-28
Apatelodidae					Ephoria			eadgara			Schaus	1934	N	2017-04-28
Apatelodidae					Ephoria			ephora			Stoll	1781	N	2017-04-28
Apatelodidae					Ephoria			ephora		paradoxa	Herrich-Schäffer	1855	Y	2017-05-18	unnecessary replacement name
Apatelodidae					Ephoria			ephora		uzita	Druce	1899	N	2017-04-28
Apatelodidae					Ephoria			gallica			Herbin	2017	Y	2017-12-18
Apatelodidae					Ephoria			hezia			Druce	1899	N	2017-04-28
Apatelodidae					Ephoria			illauta			Draudt	1929	N	2017-04-28
Apatelodidae					Ephoria			liliana			Schaus	1900	N	2017-04-28
Apatelodidae					Ephoria			lybia			Druce	1898	N	2017-04-28
Apatelodidae					Ephoria			lybia	hoppi		Draudt	1929	N	2017-04-28
Apatelodidae					Ephoria			lybia	nubilosa		Dognin	1924	N	2017-04-28
Apatelodidae					Ephoria			marginalis			Walker	1856	N	2017-04-28
Apatelodidae					Ephoria			marginalis		basifulva	Kaye	1901	N	2017-05-19
Apatelodidae					Ephoria			marginalis		basifulva	Kaye	1901	N	2017-04-28
Apatelodidae					Ephoria			marginalis		lineosa	Walker	1856	N	2017-04-28
Apatelodidae					Ephoria			mendozata			Dognin	1923	N	2017-04-28
Apatelodidae					Ephoria			thea			Schaus	1924	N	2017-04-28
Apatelodidae					Ephoria			yanisi			Herbin & Mielke	[2018]	Y	2018-01-25
Apatelodidae					Epiopsis						Piñas Rubio	2008	-	2017-09-04	nomen nudum
Apatelodidae					Epiopsis			cenicienta			Piñas Rubio	2008	Y	2017-09-04	nomen nudum
Apatelodidae					Epiopsis			claudia			Piñas Rubio	2008	Y	2017-09-04	nomen nudum
Apatelodidae					Falcatelodes						Draudt	1929	-	2017-04-28
Apatelodidae					Falcatelodes			anava			Druce	1890	N	2017-04-28
Apatelodidae					Falcatelodes			anava		laffonti	Dognin	1897	N	2017-05-19
Apatelodidae					Olceclostera						Butler	1879	-	2017-04-28
Apatelodidae					Olceclostera			amelda			Dyar	1915	Y	2017-04-28
Apatelodidae					Olceclostera			amoria			Druce	1890	Y	2017-04-28
Apatelodidae					Olceclostera			angelica			Grote	1864	N	2017-05-23
Apatelodidae					Olceclostera			angelica		hyalinopuncta	Packard	1864	N	2017-06-06
Apatelodidae					Olceclostera			avangareza			Schaus	1910	Y	2017-04-28
Apatelodidae					Olceclostera			azteca			Schaus	1894	Y	2017-04-28
Apatelodidae					Olceclostera			basifusca			Draudt	1929	Y	2017-04-28
Apatelodidae					Olceclostera			bifenestrata			Schaus	1912	Y	2017-04-28
Apatelodidae					Olceclostera			bilinea			Schaus	1900	Y	2017-04-28
Apatelodidae					Olceclostera			brama			Schaus	1920	Y	2017-04-28
Apatelodidae					Olceclostera			castra			Jones	1908	Y	2017-04-28
Apatelodidae					Olceclostera			castrona			Schaus	1894	Y	2017-04-28
Apatelodidae					Olceclostera			cuyabata			Draudt	1929	Y	2017-04-28
Apatelodidae					Olceclostera			guanduna			Draudt	1929	Y	2017-04-28
Apatelodidae					Olceclostera			ibar			Schaus	1927	N	2017-04-28
Apatelodidae					Olceclostera			indentata			Schaus	1910	Y	2017-04-28
Apatelodidae					Olceclostera			indistincta			Edwards, H.	1886	N	2017-05-23
Apatelodidae					Olceclostera			interniplaga			Draudt	1929	Y	2017-04-28
Apatelodidae					Olceclostera			irrorata			Butler	1878	Y	2017-04-28
Apatelodidae					Olceclostera			magniplaga			Schaus	1910	Y	2017-04-28
Apatelodidae					Olceclostera			maya			Schaus	1892	Y	2017-04-28
Apatelodidae					Olceclostera			microps			Walker	1855	N	2017-04-28
Apatelodidae					Olceclostera			mutusca			Schaus	1892	Y	2017-04-28
Apatelodidae					Olceclostera			nigripuncta			Schaus	1910	Y	2017-04-28
Apatelodidae					Olceclostera			oriunda			Schaus	1905	Y	2017-04-28
Apatelodidae					Olceclostera			porioni			Herbin & Mielke	[2018]	Y	2018-01-25
Apatelodidae					Olceclostera			reperta			Walker	1865	N	2017-04-28
Apatelodidae					Olceclostera			seraphica			Dyar	1906	N	2017-04-28
Apatelodidae					Olceclostera			truncata			Walker	1855	N	2017-04-28
Apatelodidae					Pantelodes						Herbin	2017	-	2017-12-18
Apatelodidae					Pantelodes			amazonica			Herbin	2017	Y	2017-12-18
Apatelodidae					Pantelodes			boliviana			Herbin	2017	Y	2017-12-18
Apatelodidae					Pantelodes			centralamericana			Herbin	2017	Y	2017-12-18
Apatelodidae					Pantelodes			drechseli			Herbin	2017	Y	2017-12-18
Apatelodidae					Pantelodes			iracoubo			Herbin	2017	Y	2017-12-18
Apatelodidae					Pantelodes			maranhensis			Herbin	2017	Y	2017-12-18
Apatelodidae					Pantelodes			ruschii			Herbin	2017	Y	2017-12-18
Apatelodidae					Pantelodes			satellitia			Walker	1855	N	2017-12-18
Apatelodidae					Prothysana						Walker	1865	-	2017-06-07
Apatelodidae					Prothysana		Compsa				Walker	1862	-	2017-06-07	junior homonym
Apatelodidae					Prothysana		Mesotages				Felder, C. & Felder, R.	1874	-	2017-06-07	junior homonym
Apatelodidae					Prothysana		Tarchon				Druce	1887	-	2017-06-01	nomen novum
Apatelodidae					Prothysana		Zolessia				de Biezanko & Monné	1968	-	2017-06-07	nomen novum
Apatelodidae					Prothysana			felderi			Druce	1887	Y	2017-06-07
Apatelodidae					Prothysana			terminalis			Walker	1855	Y	2017-04-28
Apatelodidae					Prothysana			terminalis		saturata	Walker	1862	N	2017-06-07
Apatelodidae					Prothysana			terminalis		trilunula	Herrich-Schäffer	[1856]	N	2017-06-07
Apatelodidae					Thelosia						Schaus	1896	-	2017-04-28
Apatelodidae					Thelosia			camina			Schaus	1896	Y	2017-04-28
Apatelodidae					Thelosia			herta			Schaus	1939	Y	2017-05-19
Apatelodidae					Thelosia			impedita			Dyar	1928	Y	2017-04-28
Apatelodidae					Thelosia			jorgenseni			Schaus	1927	Y	2017-04-28
Apatelodidae					Thelosia			mayaca			Schaus	1939	Y	2017-04-28
Apatelodidae					Thelosia			meldola			Schaus	1900	Y	2017-04-28
Apatelodidae					Thelosia			minois			Schaus	1892	N	2017-04-28
Apatelodidae					Thelosia			phalaena			Schaus	1896	Y	2017-04-28
Apatelodidae					Thelosia			postflavida			Draudt	1929	Y	2017-04-28
Apatelodidae					Thelosia			resputa			Draudt	1929	Y	2017-04-28
Apatelodidae					Thelosia			truncata			Schaus	1894	N	2017-04-28
Apatelodidae					Thelosia			truncata	rectilinea		Dognin	1922	N	2017-04-28
Apatelodidae					Thelosia			truvena			Schaus	1896	Y	2017-04-28
Apatelodidae					Thyrioclostera						Draudt	1929	-	2017-04-28
Apatelodidae					Thyrioclostera			trespuntada			Dognin	1894	N	2017-04-28
Apatelodidae					Zanola						Walker	1855	-	2017-04-28
Apatelodidae					Zanola		Dorisia				Möschler	1883	-	2017-04-28
Apatelodidae					Zanola			aegina			Stoll	1782	N	2017-04-28
Apatelodidae					Zanola			elongata			Schaus	1910	Y	2017-04-28
Apatelodidae					Zanola			fieldi			Schaus	1910	Y	2017-04-28
Apatelodidae					Zanola			impedita			Dognin	1916	Y	2017-04-28
Apatelodidae					Zanola			lychnica			Dognin	1920	Y	2017-04-28
Apatelodidae					Zanola			poecila			Draudt	1929	Y	2017-04-28
Apatelodidae					Zanola			verago			Cramer	1777	N	2017-04-28
Apatelodidae					Zanola			verago		difficilis	Walker	1855	Y	2017-04-28
Apatelodidae					Zanola			verago		harpis	Druce	1887	Y	2017-04-28
Apatelodidae					Zanola			verago		vivax	Edwards, H.	1884	N	2017-04-28
Bombycidae											Latreille	[1802]	-	2017-04-28
Bombycidae					Bombycites						Heer	1849	-	2017-06-12	incertae sedis (fossil)
Bombycidae	Bombycinae										Latreille	[1802]	-	2017-04-28
Bombycidae	Bombycinae				Amusaron						Bouyer	2008	-	2017-04-28
Bombycidae	Bombycinae				Amusaron			kolga			Druce	1887	N	2017-04-28
Bombycidae	Bombycinae				Amusaron			pruinosa			Grünberg	1907	N	2017-04-28
Bombycidae	Bombycinae				Bivincula						Dierl	1978	-	2017-04-28
Bombycidae	Bombycinae				Bivincula		Bivinculata				Dierl	1978	-	2017-05-18
Bombycidae	Bombycinae				Bivincula			diaphana			Moore	1879	N	2017-04-28
Bombycidae	Bombycinae				Bivincula			diaphana		cyproba	Swinhoe	1894	N	2017-04-28
Bombycidae	Bombycinae				Bivincula			kalikotei			Dierl	1978	N	2017-05-18
Bombycidae	Bombycinae				Bivincula			watsoni			Dierl	1978	Y	2017-04-28
Bombycidae	Bombycinae				Bombyx						Linnaeus	1758	-	2017-04-28
Bombycidae	Bombycinae				Bombyx		Minyas				Savigny	1816	-	2017-04-28
Bombycidae	Bombycinae				Bombyx		Theophila				Moore	1862	-	2017-04-28
Bombycidae	Bombycinae				Bombyx			horsfieldi			Moore	1859	Y	2017-04-28
Bombycidae	Bombycinae				Bombyx			huttoni			Westwood	1847	Y	2017-04-28
Bombycidae	Bombycinae				Bombyx			huttoni		affinis	Hutton	1864	Y	2017-04-28
Bombycidae	Bombycinae				Bombyx			huttoni		bengalensis	Moore	1862	Y	2017-04-28
Bombycidae	Bombycinae				Bombyx			huttoni		sherwilli	Hutton	1864	Y	2017-04-28
Bombycidae	Bombycinae				Bombyx			incomposita			van Eecke	1929	N	2017-04-28
Bombycidae	Bombycinae				Bombyx			lemeepauli			Lemee	1950	Y	2017-04-28
Bombycidae	Bombycinae				Bombyx			lemeepauli		albicurva	Zhu & Wang	1993	N	2017-04-28
Bombycidae	Bombycinae				Bombyx			lugubris			Drury	1782	N	2017-04-28
Bombycidae	Bombycinae				Bombyx			mandarina			Moore	1872	Y	2017-04-28
Bombycidae	Bombycinae				Bombyx			mandarina	formosana		Matsumura	1927	N	2017-04-28
Bombycidae	Bombycinae				Bombyx			mori			Linnaeus	1758	Y	2017-04-28
Bombycidae	Bombycinae				Bombyx			mori		arracanensis	Moore & Hutton	1862	Y	2017-04-28
Bombycidae	Bombycinae				Bombyx			mori		brunnea	Grünberg	1911	Y	2017-05-18	infrasubspecific
Bombycidae	Bombycinae				Bombyx			mori		croesi	Moore & Hutton	1862	Y	2017-04-28
Bombycidae	Bombycinae				Bombyx			mori		fortunatus	Moore & Hutton	1862	Y	2017-04-28
Bombycidae	Bombycinae				Bombyx			mori		fuscata	Motschulsky	1866	Y	2017-04-28
Bombycidae	Bombycinae				Bombyx			mori		meridionalis	Wood-Mason	1886	Y	2017-04-28
Bombycidae	Bombycinae				Bombyx			mori		sinensis	Moore & Hutton	1862	Y	2017-04-28
Bombycidae	Bombycinae				Bombyx			mori		textor	Moore & Hutton	1862	Y	2017-04-28
Bombycidae	Bombycinae				Bombyx			polygoni			Savigny	1816	N	2017-05-18	nomen oblitum
Bombycidae	Bombycinae				Bombyx			shini			Park & Sohn	2002	Y	2017-04-28
Bombycidae	Bombycinae				Elachyophthalma						Felder, C.	1861	-	2017-04-28
Bombycidae	Bombycinae				Elachyophthalma		Calapterote				Holland	1900	-	2017-04-28
Bombycidae	Bombycinae				Elachyophthalma		Diversosexus				Bethune-Baker	1904	-	2017-04-28
Bombycidae	Bombycinae				Elachyophthalma		Elachyophtalma				Felder, C.	1861	-	2017-05-18	incorrect original spelling
Bombycidae	Bombycinae				Elachyophthalma		Laganda				Walker	1865	-	2017-04-28
Bombycidae	Bombycinae				Elachyophthalma			bicolor			Bethune-Baker	1904	N	2017-04-28
Bombycidae	Bombycinae				Elachyophthalma			butleri			Holland	1900	N	2017-04-28
Bombycidae	Bombycinae				Elachyophthalma			cotanoides			Rothschild	1920	Y	2017-04-28
Bombycidae	Bombycinae				Elachyophthalma			dohertyi			Rothschild	1920	Y	2017-04-28
Bombycidae	Bombycinae				Elachyophthalma			doreyana			Rothschild	1920	Y	2017-04-28
Bombycidae	Bombycinae				Elachyophthalma			fergussonis			Rothschild	1920	Y	2017-04-28
Bombycidae	Bombycinae				Elachyophthalma			flava			van Eecke	1924	N	2017-04-28
Bombycidae	Bombycinae				Elachyophthalma			flavolivacea			Rothschild	1915	N	2017-04-28
Bombycidae	Bombycinae				Elachyophthalma			goliathina			Rothschild	1920	Y	2017-04-28
Bombycidae	Bombycinae				Elachyophthalma			infraluteola			Rothschild	1920	Y	2017-04-28
Bombycidae	Bombycinae				Elachyophthalma			insularum			Rothschild	1920	Y	2017-04-28
Bombycidae	Bombycinae				Elachyophthalma			inturbida			Walker	1865	N	2017-04-28
Bombycidae	Bombycinae				Elachyophthalma			inturbida		megaxantha	Walker	1866	N	2017-04-28
Bombycidae	Bombycinae				Elachyophthalma			kebeae			Bethune-Baker	1904	N	2017-04-28
Bombycidae	Bombycinae				Elachyophthalma			keiensis			Rothschild	1920	Y	2017-04-28
Bombycidae	Bombycinae				Elachyophthalma			meeki			Rothschild	1920	Y	2017-04-28
Bombycidae	Bombycinae				Elachyophthalma			melanoleuca			Rothschild	1920	Y	2017-04-28
Bombycidae	Bombycinae				Elachyophthalma			mimiocotana			Rothschild	1920	Y	2017-04-28
Bombycidae	Bombycinae				Elachyophthalma			picaria			Walker	1865	N	2017-04-28
Bombycidae	Bombycinae				Elachyophthalma			quadrimaculata			van Eecke	1924	Y	2017-04-28
Bombycidae	Bombycinae				Elachyophthalma			semicostalis			Rothschild	1920	Y	2017-04-28
Bombycidae	Bombycinae				Elachyophthalma			tricolor			Felder, C.	1861	Y	2017-04-28
Bombycidae	Bombycinae				Ernolatia						Walker	1862	-	2017-04-28
Bombycidae	Bombycinae				Ernolatia			lida			Moore	1858	N	2017-04-28
Bombycidae	Bombycinae				Ernolatia			lida		signata	Walker	1862	Y	2017-04-28
Bombycidae	Bombycinae				Ernolatia			moorei			Hutton	1865	N	2017-04-28
Bombycidae	Bombycinae				Ernolatia			moorei		bipuncta	Zhu & Wang, L.Y.	1993	N	2017-04-28
Bombycidae	Bombycinae				Ernolatia			moorei		plana	Walker	1865	N	2017-04-28
Bombycidae	Bombycinae				Gastridiota						Turner	1922	-	2017-04-28
Bombycidae	Bombycinae				Gastridiota			adoxima			Turner	1902	N	2017-04-28
Bombycidae	Bombycinae				Gnathocinara						Dierl	1978	-	2017-04-28
Bombycidae	Bombycinae				Gnathocinara			boi			Wang, X. & Zolotuhin	2015	Y	2017-04-28
Bombycidae	Bombycinae				Gnathocinara			situla			van Eecke	1929	N	2017-04-28
Bombycidae	Bombycinae				Gunda						Walker	1862	-	2017-04-28
Bombycidae	Bombycinae				Gunda		Aristhala				Moore	1878	-	2017-04-28
Bombycidae	Bombycinae				Gunda		Clenora				Swinhoe	1899	-	2017-04-28
Bombycidae	Bombycinae				Gunda		Hanisa				Moore	1879	-	2017-04-28
Bombycidae	Bombycinae				Gunda		Norasuma				Moore	1872	-	2017-04-28
Bombycidae	Bombycinae				Gunda			aroa			Bethune-Baker	1904	Y	2017-04-28
Bombycidae	Bombycinae				Gunda			engonata			Swinhoe	1899	N	2017-04-28
Bombycidae	Bombycinae				Gunda			javanica			Moore	1872	N	2017-04-28
Bombycidae	Bombycinae				Gunda			javanica		palawana	Schultze	1925	Y	2017-04-28
Bombycidae	Bombycinae				Gunda			javanica		richteri	Weymer	1890	N	2017-04-28
Bombycidae	Bombycinae				Gunda			javanica	tonkinensis		Lemée	1950	Y	2017-04-28
Bombycidae	Bombycinae				Gunda			ochracea			Walker	1862	Y	2017-04-28
Bombycidae	Bombycinae				Gunda			ochracea		hainana	Moore	1878	N	2017-04-28
Bombycidae	Bombycinae				Gunda			ochracea		leefmansi	Roepke	1924	Y	2017-04-28
Bombycidae	Bombycinae				Gunda			ochracea		sikkima	Moore	1878	N	2017-04-28
Bombycidae	Bombycinae				Gunda			ochracea		variegata	Hampson	[1893]	N	2017-04-28
Bombycidae	Bombycinae				Gunda			sesostris			Vuillot	1893	N	2017-04-28
Bombycidae	Bombycinae				Gunda			sesostris		epygrypa	West	1932	N	2017-04-28
Bombycidae	Bombycinae				Gunda			sesostris		ostruma	Zhu & Wang, L.Y.	1993	N	2017-04-28
Bombycidae	Bombycinae				Gunda			sesostris		proxima	Roepke	1924	Y	2017-04-28
Bombycidae	Bombycinae				Gunda			subnotata			Walker	1859	N	2017-04-28
Bombycidae	Bombycinae				Gunda			thwaitesii			Moore	1883	N	2017-06-16
Bombycidae	Bombycinae				Gunda			thwaitesii		apicalis	Hampson	[1893]	N	2017-04-28
Bombycidae	Bombycinae				Ocinara						Walker	1856	-	2017-04-28
Bombycidae	Bombycinae				Ocinara			abbreviata			Dierl	1978	Y	2017-04-28
Bombycidae	Bombycinae				Ocinara			albiceps			Walker	1862	N	2017-04-28
Bombycidae	Bombycinae				Ocinara			albiceps	obscurata		Dierl	1978	Y	2017-04-28
Bombycidae	Bombycinae				Ocinara			albicollis			Walker	1862	N	2017-04-28
Bombycidae	Bombycinae				Ocinara			arabica			Wiltshire	1982	N	2017-04-28
Bombycidae	Bombycinae				Ocinara			bifurcula			Dierl	1978	Y	2017-04-28
Bombycidae	Bombycinae				Ocinara			dilectula			Walker	1856	Y	2017-04-28
Bombycidae	Bombycinae				Ocinara			dilectula		waringi	Snellen	1877	N	2017-04-28
Bombycidae	Bombycinae				Ocinara			ficicola			Ormerod	1889	N	2017-04-28
Bombycidae	Bombycinae				Ocinara			leucoides			Strand	1910	Y	2017-04-28
Bombycidae	Bombycinae				Ocinara			malagasy			Viette	1965	Y	2017-04-28
Bombycidae	Bombycinae				Ocinara			polia			Tams	1935	N	2017-04-28
Bombycidae	Bombycinae				Penicillifera						Dierl	1978	-	2017-04-28
Bombycidae	Bombycinae				Penicillifera			apicalis			Walker	1862	N	2017-04-28
Bombycidae	Bombycinae				Penicillifera			apicalis		signifera	Walker	1862	N	2017-04-28
Bombycidae	Bombycinae				Penicillifera			infuscata			Dierl	1978	N	2017-04-28
Bombycidae	Bombycinae				Penicillifera			lactea			Hutton	1865	N	2017-04-28
Bombycidae	Bombycinae				Penicillifera			lactea		linafuncta	Zhu & Wang, L.Y.	1993	N	2017-04-28
Bombycidae	Bombycinae				Penicillifera			purpurascens			Holloway	1976	N	2017-04-28
Bombycidae	Bombycinae				Penicillifera			tamsi			Lemée	1950	N	2017-04-28
Bombycidae	Bombycinae				Penicillifera			tamsi		tetrapuncta	Zhu & Wang, L.Y.	1993	N	2017-04-28
Bombycidae	Bombycinae				Racinoa						Bouyer	2008	-	2017-04-28
Bombycidae	Bombycinae				Racinoa			albivertex			Strand	1910	N	2017-04-28
Bombycidae	Bombycinae				Racinoa			chaggorum			Darge	2016	Y	2017-04-28
Bombycidae	Bombycinae				Racinoa			curvata			Darge	2016	Y	2017-04-28
Bombycidae	Bombycinae				Racinoa			distincta			Darge	2016	Y	2017-04-28
Bombycidae	Bombycinae				Racinoa			flavalineosa			Darge	2016	Y	2017-04-28
Bombycidae	Bombycinae				Racinoa			fuscocervina			Strand	1910	N	2017-04-28
Bombycidae	Bombycinae				Racinoa			ianthe			Druce	1887	N	2017-04-28
Bombycidae	Bombycinae				Racinoa			igomaensis			Darge	2016	Y	2017-04-28
Bombycidae	Bombycinae				Racinoa			maculifrons			Strand	1910	N	2017-04-28
Bombycidae	Bombycinae				Racinoa			manengoubensis			Darge	2016	Y	2017-04-28
Bombycidae	Bombycinae				Racinoa			metallescens			Möschler	1887	N	2017-04-28
Bombycidae	Bombycinae				Racinoa			napakensis			Darge	2016	Y	2017-04-28
Bombycidae	Bombycinae				Racinoa			obliquisigna			Hampson	1910	N	2017-04-28
Bombycidae	Bombycinae				Racinoa			ochraceipennis			Strand	1910	N	2017-04-28
Bombycidae	Bombycinae				Racinoa			pallicornis			Strand	1910	N	2017-04-28
Bombycidae	Bombycinae				Racinoa			signicosta			Strand	1910	N	2017-04-28
Bombycidae	Bombycinae				Racinoa			spiralis			Kühne	2008	N	2017-04-28
Bombycidae	Bombycinae				Racinoa			ulembwensis			Darge	2016	Y	2017-04-28
Bombycidae	Bombycinae				Racinoa			versicolora			Kühne	2008	N	2017-04-28
Bombycidae	Bombycinae				Racinoa			zolotuhini			Kühne	2008	N	2017-04-28
Bombycidae	Bombycinae				Rondotia						Moore	1885	-	2017-04-28
Bombycidae	Bombycinae				Rondotia		Ectrocta				Hampson	[1893]	-	2017-04-28
Bombycidae	Bombycinae				Rondotia			diaphana			Hampson	[1893]	N	2017-04-28
Bombycidae	Bombycinae				Rondotia			lineata			Leech	1889	Y	2017-04-28
Bombycidae	Bombycinae				Rondotia			menciana			Moore	1885	Y	2017-04-28
Bombycidae	Bombycinae				Rondotia			menciana	lurida		Fixsen	1887	Y	2017-04-28
Bombycidae	Bombycinae				Rotunda						Wang, X. & Zolotuhin	2015	-	2017-04-28
Bombycidae	Bombycinae				Rotunda			rotundapex			Miyata & Kishida	1990	N	2017-04-28
Bombycidae	Bombycinae				Rotunda			rotundapex		shini	Park & Sohn	2002	N	2017-04-28
Bombycidae	Bombycinae				Trilocha						Moore	1858	-	2017-06-01	nomen novum
Bombycidae	Bombycinae				Trilocha		Chazena				Walker	1869	-	2017-04-28
Bombycidae	Bombycinae				Trilocha		Naprepa				Walker	1855	-	2017-04-28	junior homonym
Bombycidae	Bombycinae				Trilocha			friedeli			Dierl	1978	Y	2017-04-28
Bombycidae	Bombycinae				Trilocha			myodes			West	1932	Y	2017-04-28
Bombycidae	Bombycinae				Trilocha			varians			Walker	1855	N	2017-04-28
Bombycidae	Bombycinae				Trilocha			varians		velata	Walker	1869	N	2017-04-28
Bombycidae	Bombycinae				Trilocha			varians	lineata		Dierl	1978	Y	2017-04-28
Bombycidae	Bombycinae				Triuncina						Dierl	1978	-	2017-04-28
Bombycidae	Bombycinae				Triuncina			brunnea			Wileman	1911	N	2017-04-28
Bombycidae	Bombycinae				Triuncina			brunnea		formosana	Mell	1958	N	2017-04-28
Bombycidae	Bombycinae				Triuncina			cervina			Walker	1865	N	2017-04-28
Bombycidae	Bombycinae				Triuncina			daii			Wang, X. & Zolotuhin	2015	Y	2017-04-28
Bombycidae	Bombycinae				Triuncina			diaphragma			Mell	1958	N	2017-04-28
Bombycidae	Bombycinae				Triuncina			diaphragma		nitidoidea	Zhu & Wang, L.Y.	1993	N	2017-04-28
Bombycidae	Bombycinae				Triuncina			nitida			Zhu & Wang	1993	N	2017-04-28
Bombycidae	Bombycinae				Triuncina			religiosae			Helfer	1837	N	2017-04-28
Bombycidae	Bombycinae				Triuncina			xiongi			Wang, X. & Zolotuhin	2015	Y	2017-04-28
Bombycidae	Bombycinae				Valvaribifidum						Wang, X., Huang, G.-H. & Wang, M.	2011	-	2017-04-28
Bombycidae	Bombycinae				Valvaribifidum			huananense			Wang, X., Huang, G.-H. & Wang, M.	2011	Y	2017-04-28
Bombycidae	Bombycinae				Valvaribifidum			sinica			Dierl	1979	N	2017-04-28
Bombycidae	Bombycinae				Vinculinula						Dierl	1978	-	2017-04-28
Bombycidae	Bombycinae				Vinculinula			attacoides			Walker	1862	N	2017-04-28
Bombycidae	Bombycinae				Vinculinula			diehli			Dierl	1978	Y	2017-04-28
Bombycidae	Bombycinae				Vingerhoedtia						Bouyer	2008	-	2017-04-28
Bombycidae	Bombycinae				Vingerhoedtia			grisea			Gaede	1927	N	2017-04-28
Bombycidae	Bombycinae				Vingerhoedtia			ruficollis			Strand	1910	N	2017-04-28
Bombycidae	Epiinae										Draudt & Schaus	1929	-	2017-04-28
Bombycidae	Epiinae				Anticla						Walker	1855	-	2017-04-28
Bombycidae	Epiinae				Anticla			antica			Walker	1855	Y	2017-04-28
Bombycidae	Epiinae				Anticla			antica		amycla	Druce	1890	N	2017-04-28
Bombycidae	Epiinae				Anticla			antica		carya	Druce	1887	Y	2017-04-28
Bombycidae	Epiinae				Anticla			antica		rutila	Druce	1887	N	2017-04-28
Bombycidae	Epiinae				Anticla			daniela			Piñas Rubio	2008	Y	2017-09-04	nomen nudum
Bombycidae	Epiinae				Anticla			flavaria			Cramer	1780	N	2017-04-28
Bombycidae	Epiinae				Anticla			flavaria		flavifuscula	Hübner	[1819]	N	2017-05-18	unnecessary replacement name
Bombycidae	Epiinae				Anticla			limosa			Schaus	1932	N	2017-04-28
Bombycidae	Epiinae				Anticla			ortygia			Druce	1887	Y	2017-04-28
Bombycidae	Epiinae				Anticla			ortygia		amphea	Druce	1890	N	2017-04-28
Bombycidae	Epiinae				Anticla			ortygia	symphora		Schaus	1929	Y	2017-04-28
Bombycidae	Epiinae				Anticla			tarasia			Schaus	1929	Y	2017-04-28
Bombycidae	Epiinae				Arotros						Schaus	1892	-	2017-04-28
Bombycidae	Epiinae				Arotros			striata			Schaus	1892	Y	2017-04-28
Bombycidae	Epiinae				Cheneya						Schaus	1929	-	2017-04-28
Bombycidae	Epiinae				Cheneya			irrufata			Dognin	1911	N	2017-04-28
Bombycidae	Epiinae				Cheneya			morrisa			Schaus	1929	Y	2017-04-28
Bombycidae	Epiinae				Cheneya			rovena			Schaus	1929	Y	2017-04-28
Bombycidae	Epiinae				Colla						Walker	1865	-	2017-04-28
Bombycidae	Epiinae				Colla		Agriochlora				Warren	1901	-	2017-04-28
Bombycidae	Epiinae				Colla		Aza				Walker	1865	-	2017-05-18	junior homonym
Bombycidae	Epiinae				Colla		Orgyopsis				Felder, C. & Felder, R.	1874	-	2017-04-28
Bombycidae	Epiinae				Colla		Prismoptera				Butler	1878	-	2017-04-28
Bombycidae	Epiinae				Colla		Spanochroa				Felder, C. & Felder, R.	1874	-	2017-04-28
Bombycidae	Epiinae				Colla			aerilia			Schaus	1929	Y	2017-04-28
Bombycidae	Epiinae				Colla			aminula			Druce	1890	N	2017-04-28
Bombycidae	Epiinae				Colla			amoena			Dognin	1923	Y	2017-04-28
Bombycidae	Epiinae				Colla			amoena	antaziana		Bryk	1953	Y	2017-04-28
Bombycidae	Epiinae				Colla			blandatrix			Felder, C. & Felder, R.	1874	N	2017-04-28
Bombycidae	Epiinae				Colla			blandatrix		margaritacea	Möschler	1872	N	2017-04-28
Bombycidae	Epiinae				Colla			coelestis			Schaus	1910	Y	2017-04-28
Bombycidae	Epiinae				Colla			coelestis	autaziana		Bryk	1953	Y	2017-04-28
Bombycidae	Epiinae				Colla			gaudialis			Schaus	1905	Y	2017-04-28
Bombycidae	Epiinae				Colla			glaucescens			Walker	1865	Y	2017-04-28
Bombycidae	Epiinae				Colla			jehlii			Schade	1939	Y	2017-04-28
Bombycidae	Epiinae				Colla			klagesi			Warren	1901	N	2017-04-28
Bombycidae	Epiinae				Colla			lilaciana			Dognin	1916	Y	2017-05-19
Bombycidae	Epiinae				Colla			melini			Bryk	1953	Y	2017-04-28
Bombycidae	Epiinae				Colla			micacea			Walker	1865	N	2017-04-28
Bombycidae	Epiinae				Colla			micacea		albescens	Schaus	1905	Y	2017-04-28
Bombycidae	Epiinae				Colla			netrix			Stoll	1780	N	2017-04-28
Bombycidae	Epiinae				Colla			opalifera			Dognin	1911	Y	2017-04-28
Bombycidae	Epiinae				Colla			opalifera		manni	Schaus	1924	Y	2017-04-28
Bombycidae	Epiinae				Colla			rhodope			Drury	1782	N	2017-04-28
Bombycidae	Epiinae				Colla			rhodope		opalina	Butler	1878	N	2017-04-28
Bombycidae	Epiinae				Colla			rhodope	transparens		Bryk	1953	Y	2017-04-28
Bombycidae	Epiinae				Colla			similis			Felder, C. & Felder, R.	1874	N	2017-04-28
Bombycidae	Epiinae				Colla			traslucida			Piñas Rubio	2008	Y	2017-09-04	nomen nudum
Bombycidae	Epiinae				Colla			umbrata			Schaus	1905	Y	2017-05-19
Bombycidae	Epiinae				Epia						Hübner	[1820]	-	2017-04-28
Bombycidae	Epiinae				Epia		Anthocroca				Butler	1878	-	2017-04-28
Bombycidae	Epiinae				Epia		Anthrocroca				Butler	1878	-	2017-06-12	nomen nudum
Bombycidae	Epiinae				Epia			casnonia			Druce	1887	N	2017-04-28
Bombycidae	Epiinae				Epia			casnonia	romaniepia		Bryk	1953	Y	2017-04-28
Bombycidae	Epiinae				Epia			domina			Cramer	1780	N	2017-04-28
Bombycidae	Epiinae				Epia			erdae			Schaus	1929	Y	2017-04-28
Bombycidae	Epiinae				Epia			hiemalis			Butler	1878	N	2017-04-28
Bombycidae	Epiinae				Epia			intricata			Druce	1904	N	2017-04-28
Bombycidae	Epiinae				Epia			lebethra			Druce	1890	N	2017-04-28
Bombycidae	Epiinae				Epia			ligia			Piñas Rubio	2008	Y	2017-09-04	nomen nudum
Bombycidae	Epiinae				Epia			lunilinea			Schaus	1920	Y	2017-04-28
Bombycidae	Epiinae				Epia			madeira			Schaus	1920	Y	2017-04-28
Bombycidae	Epiinae				Epia			muscosa			Butler	1878	N	2017-04-28
Bombycidae	Epiinae				Epia			muscosa		cuneifera	Butler	1878	N	2017-04-28
Bombycidae	Epiinae				Epia			parsenia			Schaus	1934	Y	2017-04-28
Bombycidae	Epiinae				Epia			picta			Schaus	1920	Y	2017-04-28
Bombycidae	Epiinae				Epia			ramos			Piñas Rubio	2008	Y	2017-09-04	nomen nudum
Bombycidae	Epiinae				Epia			vulnerata			Felder, C. & Felder, R.	1874	N	2017-04-28
Bombycidae	Epiinae				Moeschleria						Saalmüller	1890	-	2017-04-28
Bombycidae	Epiinae				Moeschleria			hulstii			Möschler	1890	Y	2017-04-28
Bombycidae	Epiinae				Quentalia						Schaus	1929	-	2017-04-28
Bombycidae	Epiinae				Quentalia			altura			Schaus	1929	N	2017-04-28
Bombycidae	Epiinae				Quentalia			amisena			Druce	1890	N	2017-04-28
Bombycidae	Epiinae				Quentalia			brunnea			Dognin	1916	N	2017-04-28
Bombycidae	Epiinae				Quentalia			callinicia			Schaus	1929	Y	2017-04-28
Bombycidae	Epiinae				Quentalia			cameloi			Schaus	1939	Y	2017-04-28
Bombycidae	Epiinae				Quentalia			caulea			Schaus	1929	Y	2017-04-28
Bombycidae	Epiinae				Quentalia			chromana			Schaus	1929	Y	2017-04-28
Bombycidae	Epiinae				Quentalia			coarya			Schaus	1929	Y	2017-04-28
Bombycidae	Epiinae				Quentalia			crenulosa			Dyar	1918	N	2017-04-28
Bombycidae	Epiinae				Quentalia			demerida			Schaus	1920	N	2017-04-28
Bombycidae	Epiinae				Quentalia			denticulata			Schaus	1912	N	2017-04-28
Bombycidae	Epiinae				Quentalia			dolorosa			Jones	1908	N	2017-04-28
Bombycidae	Epiinae				Quentalia			drepanoides			Walker	1866	N	2017-04-28
Bombycidae	Epiinae				Quentalia			ephonia			Stoll	1791	N	2017-04-28
Bombycidae	Epiinae				Quentalia			ephonia		lividia	Druce	1887	N	2017-04-28
Bombycidae	Epiinae				Quentalia			ephonia	romani		Bryk	1953	Y	2017-04-28
Bombycidae	Epiinae				Quentalia			excisa			Maassen	1890	N	2017-04-28
Bombycidae	Epiinae				Quentalia			felina			Beutelspacher	1984	N	2017-04-28
Bombycidae	Epiinae				Quentalia			ficus			Herrich-Schäffer	1856	N	2017-04-28
Bombycidae	Epiinae				Quentalia			ficus		cachiana	Schaus	1912	N	2017-04-28
Bombycidae	Epiinae				Quentalia			granisca			Schaus	1920	N	2017-04-28
Bombycidae	Epiinae				Quentalia			incurvata			Dognin	1922	N	2017-04-28
Bombycidae	Epiinae				Quentalia			intranea			Dognin	1914	N	2017-04-28
Bombycidae	Epiinae				Quentalia			lapana			Schaus	1920	N	2017-04-28
Bombycidae	Epiinae				Quentalia			lapanensis			Schaus	1929	N	2017-04-28
Bombycidae	Epiinae				Quentalia			lapanensis	lapanula		Bryk	1953	Y	2017-04-28
Bombycidae	Epiinae				Quentalia			macerina			Schaus	1929	Y	2017-04-28
Bombycidae	Epiinae				Quentalia			maevia			Druce	1898	N	2017-04-28
Bombycidae	Epiinae				Quentalia			maevia		subrufa	Schaus	1922	N	2017-04-28
Bombycidae	Epiinae				Quentalia			maevia		umbrata	Schaus	1905	N	2017-04-28
Bombycidae	Epiinae				Quentalia			medinara			Schaus	1929	Y	2017-04-28
Bombycidae	Epiinae				Quentalia			melchthala			Schaus	1929	Y	2017-04-28
Bombycidae	Epiinae				Quentalia			minasa			Schaus	1929	Y	2017-04-28
Bombycidae	Epiinae				Quentalia			moratina			Schaus	1929	Y	2017-04-28
Bombycidae	Epiinae				Quentalia			napima			Schaus	1929	Y	2017-04-28
Bombycidae	Epiinae				Quentalia			numalia			Schaus	1929	Y	2017-04-28
Bombycidae	Epiinae				Quentalia			oaxacana			Schaus	1900	N	2017-04-28
Bombycidae	Epiinae				Quentalia			ojeda			Dognin	1889	N	2017-04-28
Bombycidae	Epiinae				Quentalia			orizava			Schaus	1900	N	2017-04-28
Bombycidae	Epiinae				Quentalia			pallida			Maassen	1890	N	2017-04-28
Bombycidae	Epiinae				Quentalia			pamina			Schaus	1900	N	2017-04-28
Bombycidae	Epiinae				Quentalia			paminella			Dognin	1922	N	2017-04-28
Bombycidae	Epiinae				Quentalia			paminella	postarcuata		Bryk	1953	Y	2017-04-28
Bombycidae	Epiinae				Quentalia			punctilinea			Dognin	1922	N	2017-04-28
Bombycidae	Epiinae				Quentalia			purulhana			Schaus	1920	N	2017-04-28
Bombycidae	Epiinae				Quentalia			ragna			Schaus	1929	Y	2017-04-28
Bombycidae	Epiinae				Quentalia			roseilinea			Schaus	1906	N	2017-04-28
Bombycidae	Epiinae				Quentalia			roseilinea		secata	Dognin	1912	N	2017-04-28
Bombycidae	Epiinae				Quentalia			secatina			Schaus	1929	Y	2017-04-28
Bombycidae	Epiinae				Quentalia			sheila			Schaus	1929	Y	2017-04-28
Bombycidae	Epiinae				Quentalia			subrubicunda			Dognin	1922	N	2017-04-28
Bombycidae	Epiinae				Quentalia			subumbrata			Dognin	1922	N	2017-04-28
Bombycidae	Epiinae				Quentalia			surynorta			Schaus	1900	N	2017-04-28
Bombycidae	Epiinae				Quentalia			tolima			Dognin	1922	N	2017-04-28
Bombycidae	Epiinae				Quentalia			tremulans			Schaus	1920	N	2017-04-28
Bombycidae	Epiinae				Quentalia			veca			Druce	1887	N	2017-04-28
Bombycidae	Epiinae				Quentalia			veca		chromana	Schaus	1929	Y	2017-04-28
Bombycidae	Epiinae				Quentalia			veca		reissi	Maassen	1890	N	2017-04-28
Bombycidae	Epiinae				Quentalia			viridans			Dognin	1922	N	2017-04-28
Bombycidae	Epiinae				Quentalia			vistosa			Piñas Rubio	2008	Y	2017-09-04	nomen nudum
Bombycidae	Epiinae				Quentalia			vittata			Walker	1855	N	2017-04-28
Bombycidae	Epiinae				Tamphana						Schaus	1892	-	2017-04-28
Bombycidae	Epiinae				Tamphana			inferna			Dognin	1916	Y	2017-05-19
Bombycidae	Epiinae				Tamphana			lojanara			Schaus	1929	Y	2017-04-28
Bombycidae	Epiinae				Tamphana			maoma			Schaus	1920	Y	2017-04-28
Bombycidae	Epiinae				Tamphana			marmorea			Schaus	1892	Y	2017-04-28
Bombycidae	Epiinae				Tamphana			orion			Dognin	1916	N	2017-04-28
Bombycidae	Epiinae				Tamphana			praecipua			Schaus	1905	Y	2017-04-28
Brahmaeidae											Swinhoe	1892	-	2017-04-28
Brahmaeidae				Lemoniadae							Hampson	1918	-	2017-04-28
Brahmaeidae					Brahmaea						Walker	1855	-	2017-04-28
Brahmaeidae					Brahmaea	Brahmaea					Walker	1855	-	2017-05-18
Brahmaeidae					Brahmaea	Brahmaea	Acanthobrahmaea				Sauter	1967	-	2017-04-28
Brahmaeidae					Brahmaea	Brahmaea	Brachygnatha				Zhang & Yang	1993	-	2017-04-28
Brahmaeidae					Brahmaea	Brahmaea	Transbrahmaea				Zolotuhin	2016	-	2017-04-28
Brahmaeidae					Brahmaea	Brahmaea		certhia			Fabricius	1793	N	2017-04-28
Brahmaeidae					Brahmaea	Brahmaea		certhia		petiveri	Butler	1866	Y	2017-04-28
Brahmaeidae					Brahmaea	Brahmaea		certhia		porphyria	Chu & Wang	1977	Y	2017-04-28
Brahmaeidae					Brahmaea	Brahmaea		europaea			Hartig	1963	Y	2017-04-28
Brahmaeidae					Brahmaea	Brahmaea		goniata			Zhang & Yang	1994	Y	2017-04-28
Brahmaeidae					Brahmaea	Brahmaea		jilinensis			Zhang	1988	Y	2017-04-28
Brahmaeidae					Brahmaea	Brahmaea		ledereri			Rogenhofer	1873	Y	2017-04-28
Brahmaeidae					Brahmaea	Brahmaea		ledereri		reducta	Hering	1932	Y	2017-04-28
Brahmaeidae					Brahmaea	Brahmaea		ledereri	christophi		Staudinger	1885	Y	2017-04-28
Brahmaeidae					Brahmaea	Brahmaea		ledereri	zaba		de Freina	1982	Y	2017-04-28
Brahmaeidae					Brahmaea	Brahmaea		lunulata			Bremer & Grey	[1853]	Y	2017-04-28
Brahmaeidae					Brahmaea	Brahmaea		lunulata		diastemata	Zhang & Yang	1993	N	2017-04-28
Brahmaeidae					Brahmaea	Brahmaea		lunulata		undulata	Bremer	1853	N	2017-04-28
Brahmaeidae					Brahmaea	Brahmaea		lunulata	carpenteri		Butler	1883	Y	2017-05-18
Brahmaeidae					Brahmaea	Brahmaea		lunulata	carpenteri	bicolor	Matsumura	1921	Y	2017-05-18
Brahmaeidae					Brahmaea	Brahmaea		lunulata	carpenteri	magnificentia	Bryk	1949	Y	2017-04-28
Brahmaeidae					Brahmaea	Brahmaea		lunulata	carpenteri	tancrei	Austaut	1896	Y	2017-04-28
Brahmaeidae					Brahmaea	Brahmaea		recta			Yang & Zhang	1994	Y	2017-04-28
Brahmaeidae					Brahmaea	Brahmaea		separata			Yang & Zhang	1994	Y	2017-04-28
Brahmaeidae					Brahmaea	Brahmophthalma					Mell	1930	-	2017-05-30
Brahmaeidae					Brahmaea	Brahmophthalma	Brahmaeops				Bryk	1949	-	2017-04-28
Brahmaeidae					Brahmaea	Brahmophthalma	Brahmidia				Bryk	1949	-	2017-04-28
Brahmaeidae					Brahmaea	Brahmophthalma		ardjoeno			Kalis	1934	Y	2017-04-28
Brahmaeidae					Brahmaea	Brahmophthalma		ardjoeno		luchti	Dupont	1937	Y	2017-04-28
Brahmaeidae					Brahmaea	Brahmophthalma		celebica			Toxopeus	1937	Y	2017-04-28
Brahmaeidae					Brahmaea	Brahmophthalma		hearseyi			White	1862	Y	2017-04-28
Brahmaeidae					Brahmaea	Brahmophthalma		hearseyi		whitei	Butler	1866	Y	2017-04-28
Brahmaeidae					Brahmaea	Brahmophthalma		japonica			Butler	1873	Y	2017-04-28
Brahmaeidae					Brahmaea	Brahmophthalma		japonica		mniszechii	Felder, C. & Felder, R.	[1874]	Y	2017-06-16
Brahmaeidae					Brahmaea	Brahmophthalma		japonica		nigrans	Butler	1880	Y	2017-05-18	infrasubspecific
Brahmaeidae					Brahmaea	Brahmophthalma		litserra			Hao, Zhang & Yang	2002	N	2017-04-28
Brahmaeidae					Brahmaea	Brahmophthalma		loeffleri			Naumann & Brosch	2005	Y	2017-04-28
Brahmaeidae					Brahmaea	Brahmophthalma		naessigi			Naumann & Brosch	2005	Y	2017-04-28
Brahmaeidae					Brahmaea	Brahmophthalma		panmacula			Zhang & Hang	1996	N	2017-04-28
Brahmaeidae					Brahmaea	Brahmophthalma		paukstadtorum			Naumann & Brosch	2005	Y	2017-04-28
Brahmaeidae					Brahmaea	Brahmophthalma		polymehntas			Hao, Zhang & Yang	2002	N	2017-04-28
Brahmaeidae					Brahmaea	Brahmophthalma		sinica			Hao, Zhang & Yang	2000	N	2017-05-18
Brahmaeidae					Brahmaea	Brahmophthalma		totimacula			Hao, Zhang & Yang	2000	N	2017-05-18
Brahmaeidae					Brahmaea	Brahmophthalma		wallichii			Gray	1831	N	2017-04-28
Brahmaeidae					Brahmaea	Brahmophthalma		wallichii		conchifera	Butler	1880	Y	2017-05-18	infrasubspecific
Brahmaeidae					Brahmaea	Brahmophthalma		wallichii		rufescens	Butler	1880	Y	2017-05-18	infrasubspecific
Brahmaeidae					Brahmaea	Brahmophthalma		wallichii		spectabilis	Hope	1841	N	2017-04-28
Brahmaeidae					Brahmaea	Brahmophthalma		wallichii	insulata		Inoue	1984	Y	2017-04-28
Brahmaeidae					Brahmaea	Brahmophthalma		wallichii	saifulica		de Freina & Witt	1982	Y	2017-04-28
Brahmaeidae					Calliprogonos						Mell	1937	-	2017-04-28
Brahmaeidae					Calliprogonos			miraculosa			Mell	1937	Y	2017-04-28
Brahmaeidae					Dactyloceras						[Hering]	1927	-	2017-07-19
Brahmaeidae					Dactyloceras	Dactyloceras					Mell	1930	-	2017-04-28
Brahmaeidae					Dactyloceras	Dactyloceras		lucina			Drury	1782	N	2017-04-28
Brahmaeidae					Dactyloceras	Dactyloceras		lucina		swainzii	Butler	1871	N	2017-04-28
Brahmaeidae					Dactyloceras	Dactyloceras		lucina		tridentata	Conte	1911	N	2017-04-28
Brahmaeidae					Dactyloceras	Dactyloceras		nebulosa			Brosch, Naumann & Meister	2002	Y	2017-04-28
Brahmaeidae					Dactyloceras	Shinocksiceras					Bouyer	2002	-	2017-04-28
Brahmaeidae					Dactyloceras	Shinocksiceras		barnsi			Joicey & Talbot	1924	N	2017-04-28
Brahmaeidae					Dactyloceras	Shinocksiceras		bramarbas			Karsch	1895	N	2017-04-28
Brahmaeidae					Dactyloceras	Shinocksiceras		cadioui			Bouyer	2008	Y	2017-04-28
Brahmaeidae					Dactyloceras	Shinocksiceras		canui			Bouyer	2002	Y	2017-04-28
Brahmaeidae					Dactyloceras	Shinocksiceras		catenigera			Karsch	1895	N	2017-04-28
Brahmaeidae					Dactyloceras	Shinocksiceras		collinsi			Bouyer	2008	Y	2017-04-28
Brahmaeidae					Dactyloceras	Shinocksiceras		ducarmei			Bouyer	2002	Y	2017-04-28
Brahmaeidae					Dactyloceras	Shinocksiceras		karinae			Bouyer	2002	Y	2017-04-28
Brahmaeidae					Dactyloceras	Shinocksiceras		maculata			Conte	1911	N	2017-05-18
Brahmaeidae					Dactyloceras	Shinocksiceras		minettii			Bouyer	2008	Y	2017-04-28
Brahmaeidae					Dactyloceras	Shinocksiceras		murphyi			Bouyer	2012	Y	2017-04-28
Brahmaeidae					Dactyloceras	Shinocksiceras		neumayeri			Pagenstecher	1885	N	2017-04-28
Brahmaeidae					Dactyloceras	Shinocksiceras		neumayeri		arrogans	Hering	1927	N	2017-04-28
Brahmaeidae					Dactyloceras	Shinocksiceras		neumayeri		conjuncta	Hering	1927	N	2017-04-28
Brahmaeidae					Dactyloceras	Shinocksiceras		neumayeri		widenmanni	Karsch	1895	N	2017-04-28
Brahmaeidae					Dactyloceras	Shinocksiceras		noellae			Bouyer	2006	Y	2017-04-28
Brahmaeidae					Dactyloceras	Shinocksiceras		ocelligera			Butler	1889	N	2017-04-28
Brahmaeidae					Dactyloceras	Shinocksiceras		ostentator			Hering	1927	N	2017-04-28
Brahmaeidae					Dactyloceras	Shinocksiceras		richinii			Berio	1940	Y	2017-04-28
Brahmaeidae					Dactyloceras	Shinocksiceras		tanzaniensis			Bouyer	2008	Y	2017-04-28
Brahmaeidae					Dactyloceras	Shinocksiceras		vandeweghei			Bouyer	2008	Y	2017-04-28
Brahmaeidae					Dactyloceras	Shinocksiceras		vingerhoedti			Bouyer	2005	Y	2017-04-28
Brahmaeidae					Lemonia						Hübner	[1820]	-	2017-04-28
Brahmaeidae					Lemonia		Crateronyx				Duponchel	[1845]	-	2017-06-12
Brahmaeidae					Lemonia		Limonia				Agassiz	1847	-	2017-05-18	unjustified emendation
Brahmaeidae					Lemonia			balcanica			Herrich-Schäffer	1844	N	2017-04-28
Brahmaeidae					Lemonia			balcanica	anatolica		Wagner	1931	Y	2017-04-28
Brahmaeidae					Lemonia			balcanica	anatolica	brunneomarginata	Wagner	1931	Y	2017-05-18	infrasubspecific
Brahmaeidae					Lemonia			balcanica	bremeri		Kollar	1846	N	2017-04-28
Brahmaeidae					Lemonia			balcanica	cis		Zolotuhin	1994	Y	2017-04-28
Brahmaeidae					Lemonia			balcanica	vashlovani		Didmanidze	1980	Y	2017-04-28
Brahmaeidae					Lemonia			ballioni			Christoph	1888	N	2017-04-28
Brahmaeidae					Lemonia			beirutica			Daniel	1965	Y	2017-04-28
Brahmaeidae					Lemonia			dumi			Linnaeus	1761	N	2017-04-28
Brahmaeidae					Lemonia			dumi		dumeti	Linnaeus	1767	N	2017-04-28
Brahmaeidae					Lemonia			dumi		hauseri	Rebel	1911	Y	2017-05-18	infrasubspecific
Brahmaeidae					Lemonia			dumi		luteoornata	Klemensiewicz	1912	Y	2017-05-18	infrasubspecific
Brahmaeidae					Lemonia			dumi		sauberi	Warnecke	1923	Y	2017-05-18	infrasubspecific
Brahmaeidae					Lemonia			dumi		schleppniki	Loebel	1934	Y	2017-05-18	infrasubspecific
Brahmaeidae					Lemonia			dumi		taraxaci	Hufnagel	1766	N	2017-05-18	nomen oblitum
Brahmaeidae					Lemonia			pauli			Staudinger	[1895]	Y	2017-04-28
Brahmaeidae					Lemonia			peilei			Rothschild	1924	Y	2017-04-28
Brahmaeidae					Lemonia			peilei	farsica		Wiltshire	1946	Y	2017-04-28
Brahmaeidae					Lemonia			peilei	klapperichi		Wiltshire	1961	Y	2017-04-28
Brahmaeidae					Lemonia			peilei	talhouki		Wiltshire	1952	Y	2017-04-28
Brahmaeidae					Lemonia			philopalus			Donzel	1842	N	2017-04-28
Brahmaeidae					Lemonia			philopalus		rungsi	Rougeot	1972	Y	2017-04-28
Brahmaeidae					Lemonia			philopalus	vazquezi		Oberthür	1916	Y	2017-04-28
Brahmaeidae					Lemonia			philopalus	vazquezi	phantasma	Marten	1955	Y	2017-04-28
Brahmaeidae					Lemonia			pia			Püngeler	1902	Y	2017-04-28
Brahmaeidae					Lemonia			pia	friedeli		Witt	1979	Y	2017-04-28
Brahmaeidae					Lemonia			pia	ispira		de Freina	1999	Y	2017-04-28
Brahmaeidae					Lemonia			ponticus			Aurivillius	1894	Y	2017-04-28
Brahmaeidae					Lemonia			sacrosancta			Püngeler	1902	Y	2017-04-28
Brahmaeidae					Lemonia			sardanapalus			Staudinger	1887	N	2017-04-28
Brahmaeidae					Lemonia			sardanapalus		tancrei	Püngeler	1914	?	04/28/2017
Brahmaeidae					Lemonia			strigata			Rougeot & Viette	1978	Y	2017-04-28
Brahmaeidae					Lemonia			strigata		strigata	Rebel	1910	Y	2017-06-16	infrasubspecific
Brahmaeidae					Lemonia			strigata	deucalion		Antoshin & Zolotuhin	2011	Y	2017-04-28
Brahmaeidae					Lemonia			syriensis			Daniel	1953	Y	2017-04-28
Brahmaeidae					Lemonia			tamara			Antoshin & Zolotuhin	2013	Y	2017-04-28
Brahmaeidae					Lemonia			taraxici			[Denis & Schiffermüller]	1775	N	2017-04-28
Brahmaeidae					Lemonia			taraxici		abluta	Dannehl	19??	Y	05/18/2017	infrasubspecific
Brahmaeidae					Lemonia			taraxici		antigone	Stauder	1902	Y	2017-05-18	infrasubspecific
Brahmaeidae					Lemonia			taraxici		depuncta	Stephens	1924	Y	2017-05-18	infrasubspecific
Brahmaeidae					Lemonia			taraxici		immaculata	Wnukowsky	1926	Y	2017-05-18	infrasubspecific
Brahmaeidae					Lemonia			taraxici		montana	Buresch	1915	Y	2017-04-28
Brahmaeidae					Lemonia			taraxici		sibirica	Wnukowsky	1934	Y	2017-04-28
Brahmaeidae					Lemonia			taraxici		taraxaconis	Gmelin	1790	N	2017-04-28
Brahmaeidae					Lemonia			taraxici		terranea	Rothschild	1909	Y	2017-04-28
Brahmaeidae					Lemonia			vallantini			Oberthür	1890	N	2017-04-28
Brahmaeidae					Lemonia			vallantini		unicolor	Oberthür	19??	?	05/18/2017	infrasubspecific
Brahmaeidae					Sabalia						Walker	1865	-	2017-04-28
Brahmaeidae					Sabalia		Conventia				Weymer	1896	-	2017-06-12
Brahmaeidae					Sabalia		Heteranaphe				Sharpe	1890	-	2017-06-12
Brahmaeidae					Sabalia			barnsi			Prout	1918	Y	2017-04-28
Brahmaeidae					Sabalia			fuelleborni			Karsch	1900	Y	2017-06-12
Brahmaeidae					Sabalia			fulvicincta			Hampson	1901	Y	2017-04-28
Brahmaeidae					Sabalia			jacksoni			Sharpe	1890	N	2017-06-12
Brahmaeidae					Sabalia			picarina			Walker	1865	Y	2017-04-28
Brahmaeidae					Sabalia			sericaria			Weymer	1896	N	2017-04-28
Brahmaeidae					Sabalia			sericaria		euterpe	Fawcett	1915	Y	2017-04-28
Brahmaeidae					Sabalia			thalia			Fawcett	1915	Y	2017-04-28
Brahmaeidae					Sabalia			tippelskirchi			Karsch	1898	Y	2017-06-12
Brahmaeidae					Spiramiopsis						Hampson	1901	-	2017-04-28
Brahmaeidae					Spiramiopsis			comma			Hampson	1901	Y	2017-04-28
Carthaeidae											Common	1966	-	2017-04-28
Carthaeidae					Carthaea						Walker	1858	-	2017-04-28
Carthaeidae					Carthaea			saturnioides			Walker	1858	Y	2017-04-28
Endromidae											Boisduval	1828	-	2017-04-28
Endromidae				Mirinidae							Kozlov	1985	-	2017-04-28
Endromidae				Oberthueriinae							Kuznetsov & Stekol'nikov	1985	-	2017-11-09
Endromidae				Prismostictinae							Forbes	1955	-	2017-04-28
Endromidae					Andraca						Walker	1865	-	2017-04-28
Endromidae					Andraca		Bombisatur				van Eecke	1921	-	2017-05-18	nomen nudum
Endromidae					Andraca		Pseudoeupterote				Shiraki	1911	-	2017-04-28
Endromidae					Andraca	Andraca					Walker	1865	-	2017-04-28
Endromidae					Andraca	Andraca		bipunctata			Walker	1865	Y	2017-04-28
Endromidae					Andraca	Andraca		bipunctata		angulata	Kishida	1993	Y	2017-04-28
Endromidae					Andraca	Andraca		draco			Zolotuhin	2012	Y	2017-06-13
Endromidae					Andraca	Andraca		lawa			Zolotuhin	2012	Y	2017-04-28
Endromidae					Andraca	Andraca		stueningi			Zolotuhin & Witt	2009	Y	2017-04-28
Endromidae					Andraca	Andraca		trilochoides			Moore	1865	Y	2017-04-28
Endromidae					Andraca	Andraca		trilochoides		henosa	Zhu & Wang, L.Y.	1993	Y	2017-04-28
Endromidae					Andraca	Andraca		trilochoides		roepkei	Bryk	1944	Y	2017-04-28
Endromidae					Andraca	Chrypathemola					Zolotuhin	2012	-	2017-04-28
Endromidae					Andraca	Chrypathemola		apodecta			Swinhoe	1907	Y	2017-04-28
Endromidae					Andraca	Chrypathemola		apodecta		corporaali	van Eecke	1921	Y	2017-06-13	nomen nudum
Endromidae					Andraca	Chrypathemola		chrysocollis			Zolotuhin	2012	Y	2017-04-28
Endromidae					Andraca	Chrypathemola		gongshanensis			Wang, X., Zeng & Wang	2011	Y	2017-04-28
Endromidae					Andraca	Chrypathemola		melli			Zolotuhin & Witt	2009	Y	2017-04-28
Endromidae					Andraca	Chrypathemola		nobilorum			Zolotuhin	2012	Y	2017-04-28
Endromidae					Andraca	Chrypathemola		nobilorum	houtuae		Wang, X. & Zolotuhin	2012	Y	2017-04-28
Endromidae					Andraca	Chrypathemola		olivacea			Matsumura	1927	Y	2017-04-28
Endromidae					Andraca	Chrypathemola		olivacea	olivacens		Mell	1958	Y	2017-04-28
Endromidae					Andraca	Chrypathemola		olivacea	olivacens	hedra	Zhu & Wang, L.Y.	1993	Y	2017-04-28
Endromidae					Andraca	Chrypathemola		olivacea	olivacens	ravida	Yang	1995	N	2017-04-28
Endromidae					Andraca	Chrypathemola		paradisea			Zolotuhin	2012	Y	2017-04-28
Endromidae					Andraca	Chrypathemola		theae			Matsumura	1909	N	2017-04-28
Endromidae					Comparmustilia						Wang, X. & Zolotuhin	2015	-	2017-04-28
Endromidae					Comparmustilia			gerontica			West	1932	N	2017-04-28
Endromidae					Comparmustilia			semiravida			Yang	1995	N	2017-04-28
Endromidae					Comparmustilia			semiravida		orthocosta	Yang	1995	N	2017-04-28
Endromidae					Comparmustilia			sphingiformis			Moore	1879	N	2017-04-28
Endromidae					Comparmustilia			sphingiformis		terminata	Yang	1995	N	2017-04-28
Endromidae					Dalailama						Staudinger	1896	-	2017-04-28
Endromidae					Dalailama			bifurca			Staudinger	1896	Y	2017-04-28
Endromidae					Dalailama			vadim			Witt	2006	Y	2017-04-28
Endromidae					Endromis						Ochsenheimer	1810	-	2017-04-28
Endromidae					Endromis		Dimorpha				Hübner	1822	-	2017-04-28
Endromidae					Endromis		Dimorpha				Hübner	[1806]	-	2017-06-12	rejected name
Endromidae					Endromis		Dorvillia				Leach	[1815]	-	2017-04-28
Endromidae					Endromis			versicolora			Linnaeus	1758	N	2017-04-28
Endromidae					Endromis			versicolora		diabolica	Niepelt	1931	Y	2017-05-18	infrasubspecific
Endromidae					Endromis			versicolora		fenestrella	Wize	1936	Y	2017-05-18	infrasubspecific
Endromidae					Endromis			versicolora		fusca	Lempke	1960	Y	2017-05-18	infrasubspecific
Endromidae					Endromis			versicolora		lapponica	Bau	1877	Y	2017-05-18
Endromidae					Endromis			versicolora		meridionalis	Rougeot	1971	Y	2017-05-18
Endromidae					Endromis			versicolora		rufescens	Lempke	1960	Y	2017-05-18	infrasubspecific
Endromidae					Endromis			versicolora		subpyrinaea	Gómez-Bustillo, Gómez de Aizpurua & Fernández-Rubio	1974	Y	2017-05-18
Endromidae					Endromis			versicolora	asiae-orientis		Warnecke	1943	Y	2017-05-18
Endromidae					Endromis			versicolora	eichleri		Alberti	1975	Y	2017-04-28
Endromidae					Endromis			versicolora	sachalinensis		Matsumura	1929	Y	2017-05-18
Endromidae					Falcogona						Zolotuhin	2007	-	2017-04-28
Endromidae					Falcogona			gryphea			Zolotuhin	2007	Y	2017-04-28
Endromidae					Mirina						Staudinger	1892	-	2017-06-01	nomen novum
Endromidae					Mirina		Mira				Staudinger	1887	-	2017-04-28	junior homonym
Endromidae					Mirina			christophi			Staudinger	1887	N	2017-04-28
Endromidae					Mirina			confucius			Zolotuhin & Witt	2000	Y	2017-04-28
Endromidae					Mirina			fenzeli			Mell	1938	Y	2017-04-28
Endromidae					Mirina			fenzeli		longnanensis	Chen & Wang, L.Y.	1993	Y	2017-04-28
Endromidae					Mustilia						Walker	1865	-	2017-04-28
Endromidae					Mustilia			attacina			Zolotuhin	2007	Y	2017-04-28
Endromidae					Mustilia			castanea			Moore	1879	Y	2017-04-28
Endromidae					Mustilia			falcipennis			Walker	1865	Y	2017-04-28
Endromidae					Mustilia			glabrata			Yang	1995	Y	2017-04-28
Endromidae					Mustilia			glabrata		lobata	Zolotuhin	2007	Y	2017-04-28
Endromidae					Mustilia			lieftincki			Roepke	1948	Y	2017-04-28
Endromidae					Mustilia			pai			Zolotuhin	2007	Y	2017-04-28
Endromidae					Mustilia			undulosa			Yang & Mao	1995	Y	2017-04-28
Endromidae					Mustilia			undulosa		sabriformis	Zolotuhin	2007	Y	2017-04-28
Endromidae					Mustilizans						Yang	1995	-	2017-04-28
Endromidae					Mustilizans			capella			Zolotuhin	2007	Y	2017-04-28
Endromidae					Mustilizans			dierli			Holloway	1987	N	2017-04-28
Endromidae					Mustilizans			dierli		baishanzua	Yang	1995	Y	2017-04-28
Endromidae					Mustilizans			dierli	refugialis		Zolotuhin	2007	Y	2017-04-28
Endromidae					Mustilizans			drepaniformis			Yang	1995	Y	2017-04-28
Endromidae					Mustilizans			eitschbergeri			Zolotuhin	2007	Y	2017-04-28
Endromidae					Mustilizans			hepatica			Moore	1879	N	2017-04-28
Endromidae					Mustilizans			hepatica		columbaris	Butler	1886	N	2017-04-28
Endromidae					Mustilizans			hepatica	aeola		Zolotuhin	2007	Y	2017-04-28
Endromidae					Mustilizans			lepusa			Zolotuhin	2007	Y	2017-04-28
Endromidae					Mustilizans			predicta			Zolotuhin	2007	Y	2017-04-28
Endromidae					Mustilizans			shennongi			Yang & Mao	1995	Y	2017-04-28
Endromidae					Mustilizans			sinjaevi			Zolotuhin	2007	Y	2017-04-28
Endromidae					Oberthueria						Kirby	1892	-	2017-06-01	nomen novum
Endromidae					Oberthueria		Euphranor				Oberthür	1881	-	2017-06-01	junior homonym
Endromidae					Oberthueria		Obertheuria				Staudinger	1892	-	2017-04-28	junior homonym
Endromidae					Oberthueria			caeca			Oberthür	1880	N	2017-04-28
Endromidae					Oberthueria			falcigera			Butler	1878	N	2017-04-28
Endromidae					Oberthueria			falcigera		rutilans	Grünberg	1911	Y	2017-05-18	infrasubspecific
Endromidae					Oberthueria			formosibia			Matsumura	1927	Y	2017-04-28
Endromidae					Oberthueria			jiatongae			Zolotuhin & Wang, X.	2013	Y	2017-04-28
Endromidae					Oberthueria			lunwan			Zolotuhin & Wang, X.	2013	Y	2017-04-28
Endromidae					Oberthueria			yandu			Zolotuhin & Wang, X.	2013	Y	2017-04-28
Endromidae					Prismosticta						Butler	1880	-	2017-04-28
Endromidae					Prismosticta			fenestrata			Butler	1880	Y	2017-04-28
Endromidae					Prismosticta			fenestrata		sinica	Yang	1995	Y	2017-04-28
Endromidae					Prismosticta			hyalinata			Butler	1885	Y	2017-04-28
Endromidae					Prismosticta			microprisma			Zolotuhin & Witt	2009	Y	2017-04-28
Endromidae					Prismosticta			regalis			Zolotuhin & Witt	2009	Y	2017-04-28
Endromidae					Prismosticta			tianpinga			Wang X., Huang & Wang	2011	Y	2017-04-28
Endromidae					Prismosticta			tiretta			Swinhoe	1903	Y	2017-04-28
Endromidae					Prismostictoides						Zolotuhin & Than Thieu	2011	-	2017-04-28
Endromidae					Prismostictoides			unihyala			Zhu & Wang, L.Y.	1993	N	2017-04-28
Endromidae					Promustilia						Zolotuhin	2007	-	2017-04-28
Endromidae					Promustilia			andracoides			Zolotuhin	2007	Y	2017-04-28
Endromidae					Promustilia			yajiangensis			Wang, X. & Zolotuhin	2015	Y	2017-04-28
Endromidae					Pseudandraca						Miyata	1970	-	2017-04-28
Endromidae					Pseudandraca			flavamaculata			Yang	1995	N	2017-04-28
Endromidae					Pseudandraca			flavamaculata		nabesan	Kishida & Owada	2002	N	2017-04-28
Endromidae					Pseudandraca			gracilis			Butler	1885	N	2017-04-28
Endromidae					Sesquiluna						Forbes	1955	-	2017-04-28
Endromidae					Sesquiluna			albilunata			Hampson	1910	N	2017-04-28
Endromidae					Sesquiluna			forbesi			Zolotuhin & Witt	2009	Y	2017-04-28
Endromidae					Sesquiluna			theophoboides			Zolotuhin & Witt	2009	Y	2017-04-28
Endromidae					Smerkata						Zolotuhin	2007	-	2017-04-28
Endromidae					Smerkata			brechlini			Zolotuhin	2007	Y	2017-04-28
Endromidae					Smerkata			craptalis			Zolotuhin	2007	Y	2017-04-28
Endromidae					Smerkata			fusca			Kishida	1993	N	2017-04-28
Endromidae					Smerkata			phaeopera			Hampson	1910	N	2017-04-28
Endromidae					Smerkata			soosi			Zolotuhin	2007	Y	2017-04-28
Endromidae					Smerkata			tzarica			Zolotuhin	2007	Y	2017-04-28
Endromidae					Smerkata			ulliae			Zolotuhin	2007	Y	2017-04-28
Endromidae					Smerkata			zolotuhini			Saldaitis, Ivinskis & Rimsaite	2015	Y	2017-05-18
Endromidae					Theophoba						Fletcher & Nye	1982	-	2017-04-28
Endromidae					Theophoba		Theophoba				Mell	1958	-	2017-05-18	nomen nudum
Endromidae					Theophoba			affinis			Kishida	1993	N	2017-04-28
Endromidae					Theophoba			mirafica			Kishida	1993	N	2017-04-28
Endromidae					Theophoba			pendulans			Mell	1958	N	2017-04-28
Eupterotidae											Swinhoe	1892	-	2017-04-28
Eupterotidae	Eupterotinae										Swinhoe	1892	-	2017-04-28
Eupterotidae	Eupterotinae				Cotana						Walker	1865	-	2017-04-28
Eupterotidae	Eupterotinae				Cotana		Epicydas				Bethune-Baker	1908	-	2017-04-28
Eupterotidae	Eupterotinae				Cotana		Hypercydas				Turner	1903	-	2017-04-28
Eupterotidae	Eupterotinae				Cotana		Nervicompressa				Bethune-Baker	1904	-	2017-04-28
Eupterotidae	Eupterotinae				Cotana			affinis			Rothschild	1917		2017-04-28
Eupterotidae	Eupterotinae				Cotana			albomaculata			Bethune-Baker	1904		2017-04-28
Eupterotidae	Eupterotinae				Cotana			albomaculata		ovata	Bethune-Baker	1908		2017-04-28
Eupterotidae	Eupterotinae				Cotana			aroa			Bethune-Baker	1904		2017-04-28
Eupterotidae	Eupterotinae				Cotana			bakeri			Joicey & Talbot	1917		2017-04-28
Eupterotidae	Eupterotinae				Cotana			bisecta			Rothschild	1917		2017-04-28
Eupterotidae	Eupterotinae				Cotana			brunnescens			Rothschild	1917		2017-04-28
Eupterotidae	Eupterotinae				Cotana			calliloma			Turner	1903	Y	2017-04-28
Eupterotidae	Eupterotinae				Cotana			castaneorufa			Rothschild	1917		2017-04-28
Eupterotidae	Eupterotinae				Cotana			dubia			Bethune-Baker	1904		2017-04-28
Eupterotidae	Eupterotinae				Cotana			dubia		doricrana	Bethune-Baker	19??		04/28/2017
Eupterotidae	Eupterotinae				Cotana			eichhorni			Rothschild	1932		2017-04-28
Eupterotidae	Eupterotinae				Cotana			erectilinea			Bethune-Baker	1910		2017-04-28
Eupterotidae	Eupterotinae				Cotana			erectilinea		setakwensis	Rothschild	1917		2017-04-28
Eupterotidae	Eupterotinae				Cotana			germana			Rothschild	1917		2017-04-28
Eupterotidae	Eupterotinae				Cotana			joiceyi			Rothschild	1917		2017-04-28
Eupterotidae	Eupterotinae				Cotana			kebeae			Bethune-Baker	1904		2017-04-28
Eupterotidae	Eupterotinae				Cotana			kebeae		grandis	Rothschild	1917		2017-04-28
Eupterotidae	Eupterotinae				Cotana			lunulata			Bethune-Baker	1904		2017-04-28
Eupterotidae	Eupterotinae				Cotana			lunulata		albaserrati	Bethune-Baker	1910		2017-04-28
Eupterotidae	Eupterotinae				Cotana			lunulata		occidentalis	Rothschild	1917		2017-04-28
Eupterotidae	Eupterotinae				Cotana			lunulata		satisbona	Rothschild	1917		2017-04-28
Eupterotidae	Eupterotinae				Cotana			lunulata		unicolor	Rothschild	1932		2017-05-19	infrasubspecific
Eupterotidae	Eupterotinae				Cotana			lunulata	montium		Rothschild	1932		2017-04-28
Eupterotidae	Eupterotinae				Cotana			meeki			Rothschild	1917		2017-04-28
Eupterotidae	Eupterotinae				Cotana			neurina			Turner	1922	Y	2017-04-28
Eupterotidae	Eupterotinae				Cotana			pallidifascia			Rothschild	1917		2017-04-28
Eupterotidae	Eupterotinae				Cotana			rosselliana			Rothschild	1917		2017-04-28
Eupterotidae	Eupterotinae				Cotana			rosselliana		diluta	Rothschild	1917		2017-04-28
Eupterotidae	Eupterotinae				Cotana			rosselliana	continentalis		Rothschild	1932		2017-04-28
Eupterotidae	Eupterotinae				Cotana			rubrescens			Walker	1865		2017-04-28
Eupterotidae	Eupterotinae				Cotana			rubrescens		kapaura	Rothschild	1917		2017-04-28
Eupterotidae	Eupterotinae				Cotana			rubrescens		oetakwensis	Rothschild	1917		2017-04-28
Eupterotidae	Eupterotinae				Cotana			rubrescens		turneri	Bethune-Baker	19??		04/28/2017
Eupterotidae	Eupterotinae				Cotana			serranotata			Lucas, T.P.	1894	N	2017-04-28
Eupterotidae	Eupterotinae				Cotana			serranotata	consuta		Lucas, T.P.	1900	N	2017-04-28
Eupterotidae	Eupterotinae				Cotana			splendida			Rothschild	1932		2017-04-28
Eupterotidae	Eupterotinae				Cotana			tenebricosa			Hering	1931		2017-04-28
Eupterotidae	Eupterotinae				Cotana			unistrigata			Bethune-Baker	1904		2017-04-28
Eupterotidae	Eupterotinae				Cotana			variegata			Rothschild	1917		2017-04-28
Eupterotidae	Eupterotinae				Dreata						Walker	1855	-	2017-04-28
Eupterotidae	Eupterotinae				Dreata			hades			Walker	1855	Y	2017-04-28
Eupterotidae	Eupterotinae				Eupterote						Hübner	[1820]	-	2017-04-28
Eupterotidae	Eupterotinae				Eupterote		Brachytera				Felder, C. & Felder, R.	1874	-	2017-04-28
Eupterotidae	Eupterotinae				Eupterote		Drepanojana				Bryk	1944	-	2017-05-18	junior homonym
Eupterotidae	Eupterotinae				Eupterote		Heringijana				Bryk	1944	-	2017-06-01	nomen novum
Eupterotidae	Eupterotinae				Eupterote		Horanpella				Moore	[1883]	-	2017-04-28
Eupterotidae	Eupterotinae				Eupterote		Leptojana				Butler	1881	-	2017-04-28
Eupterotidae	Eupterotinae				Eupterote		Mallarctus				Mell	1930	-	2017-05-30
Eupterotidae	Eupterotinae				Eupterote		Messata				Walker	1855	-	2017-04-28
Eupterotidae	Eupterotinae				Eupterote		Murlida				Moore	[1860]	-	2017-04-28
Eupterotidae	Eupterotinae				Eupterote		Pachyjana				Butler	1881	-	2017-04-28
Eupterotidae	Eupterotinae				Eupterote		Spalyria				Moore	1884	-	2017-04-28
Eupterotidae	Eupterotinae				Eupterote		Tagora				Walker	1855	-	2017-04-28
Eupterotidae	Eupterotinae				Eupterote			acesta			Swinhoe	18??		2017-04-28
Eupterotidae	Eupterotinae				Eupterote			alba			Swinhoe	1892		2017-04-28
Eupterotidae	Eupterotinae				Eupterote			amaena			Walker	1855		2017-04-28
Eupterotidae	Eupterotinae				Eupterote			arctiades			Hampson	18??		2017-04-28
Eupterotidae	Eupterotinae				Eupterote			axesta			Swinhoe	1894		2017-04-28
Eupterotidae	Eupterotinae				Eupterote			balwanti			Bhasin	1946		2017-04-28
Eupterotidae	Eupterotinae				Eupterote			bifasciata			Kishida	1994	Y	2018-01-18
Eupterotidae	Eupterotinae				Eupterote			calandra			Swinhoe	1894		2017-04-28
Eupterotidae	Eupterotinae				Eupterote			cardamomi			Renga	1948		2017-04-28
Eupterotidae	Eupterotinae				Eupterote			celebica			Nässig, Holloway & Beeke	2011	Y	2017-04-28
Eupterotidae	Eupterotinae				Eupterote			chinensis			Leech	1898	Y	2017-04-28
Eupterotidae	Eupterotinae				Eupterote			citheronia			Bryk	1944		2017-04-28
Eupterotidae	Eupterotinae				Eupterote			citrina			Walker	1855	N	2017-04-28
Eupterotidae	Eupterotinae				Eupterote			citrina		lutosa	Grünberg	1914		2017-04-28
Eupterotidae	Eupterotinae				Eupterote			crinita			Swinhoe	1899		2017-04-28
Eupterotidae	Eupterotinae				Eupterote			decolorata			Grünberg	1914	N	2018-01-18
Eupterotidae	Eupterotinae				Eupterote			diffusa			Walker	1865	Y	2017-04-28
Eupterotidae	Eupterotinae				Eupterote			diffusa		primularis	Moore	1884	N	2017-04-28
Eupterotidae	Eupterotinae				Eupterote			discrepans			Moore	1884	N	2017-04-28
Eupterotidae	Eupterotinae				Eupterote			domina			Stoll	17??	N	2017-11-10
Eupterotidae	Eupterotinae				Eupterote			domina		pulchra	Swinhoe	18??		2017-04-28
Eupterotidae	Eupterotinae				Eupterote			dulcinea			Swinhoe	1901		2017-04-28
Eupterotidae	Eupterotinae				Eupterote			epicharis			West	1932		2017-04-28
Eupterotidae	Eupterotinae				Eupterote			fabia			Cramer	1779	N	2017-04-28
Eupterotidae	Eupterotinae				Eupterote			fabia		alterata	Moore	1884	Y	2017-06-30
Eupterotidae	Eupterotinae				Eupterote			fabia		auriflua	Moore	1884	Y	2017-04-28
Eupterotidae	Eupterotinae				Eupterote			fabia		discordens	Butler	1881	Y	2017-04-28
Eupterotidae	Eupterotinae				Eupterote			fabia		fasciata	Moore	1887	Y	2017-04-28
Eupterotidae	Eupterotinae				Eupterote			fabia		gyra	Swinhoe	1885	Y	2017-04-28
Eupterotidae	Eupterotinae				Eupterote			fabia		immutata	Moore	1884	Y	2017-04-28
Eupterotidae	Eupterotinae				Eupterote			fabia		lucia	Butler	1885	Y	2017-04-28
Eupterotidae	Eupterotinae				Eupterote			fabia		mutans	Walker	1885	N	2017-04-28
Eupterotidae	Eupterotinae				Eupterote			fabia		ochripicta	Moore	1879	Y	2017-04-28
Eupterotidae	Eupterotinae				Eupterote			fabia		permutata	Moore	1884	Y	2017-04-28
Eupterotidae	Eupterotinae				Eupterote			fabia	asemos		Bryk	1950		2017-04-28
Eupterotidae	Eupterotinae				Eupterote			flavicollis			Guérin-Méneville	1843	N	2017-04-28
Eupterotidae	Eupterotinae				Eupterote			flavicollis		adolphaei	Guérin-Méneville	1843	N	2017-04-28
Eupterotidae	Eupterotinae				Eupterote			flavicollis		collaris	Guérin-Méneville	1843	N	2017-04-28
Eupterotidae	Eupterotinae				Eupterote			flavida			Moore	1884		2017-04-28
Eupterotidae	Eupterotinae				Eupterote			flavida		acinea	Swinhoe	1891		2017-04-28
Eupterotidae	Eupterotinae				Eupterote			flavida		procumbens	Grünberg	19??		2017-04-28
Eupterotidae	Eupterotinae				Eupterote			formosana			Matsumura	1908		2017-04-28
Eupterotidae	Eupterotinae				Eupterote			glaucescens			Walker	1855	N	2017-04-28
Eupterotidae	Eupterotinae				Eupterote			harmani			Holloway	1987	Y	2017-04-28
Eupterotidae	Eupterotinae				Eupterote			hibisci			Fabricius	1775	N	2017-04-28
Eupterotidae	Eupterotinae				Eupterote			hibisci		anada	Moore	1860	N	2017-04-28
Eupterotidae	Eupterotinae				Eupterote			hibisci		geminata	Walker	1855	N	2017-04-28
Eupterotidae	Eupterotinae				Eupterote			hibisci		lineata	Walker	1855	N	2017-04-28
Eupterotidae	Eupterotinae				Eupterote			hibisci		petosiris	Stoll	1782	N	2017-04-28
Eupterotidae	Eupterotinae				Eupterote			hibisci		phalaenaria	Felder, C. & Felder, R.	1874	N	2017-04-28
Eupterotidae	Eupterotinae				Eupterote			hibisci		placida	Moore	1883	N	2017-04-28
Eupterotidae	Eupterotinae				Eupterote			hibisci	gardneri		Bryk	1950		2017-04-28
Eupterotidae	Eupterotinae				Eupterote			kageri			Nässig	1989	Y	2017-04-28
Eupterotidae	Eupterotinae				Eupterote			kalliesi			Nässig	2000	Y	2017-04-28
Eupterotidae	Eupterotinae				Eupterote			lineosa			Walker	1855	N	2017-04-28
Eupterotidae	Eupterotinae				Eupterote			liquidambaris			Mell	1930		2017-04-28
Eupterotidae	Eupterotinae				Eupterote			minor			Hampson	[1893]	Y	2017-04-28
Eupterotidae	Eupterotinae				Eupterote			mollifera			Walker	1865	N	2017-04-28
Eupterotidae	Eupterotinae				Eupterote			mollifera		anthereata	Walker	1865	N	2017-04-28
Eupterotidae	Eupterotinae				Eupterote			mollifera		canaraica	Moore	1879	Y	2017-04-28
Eupterotidae	Eupterotinae				Eupterote			mollifera		contaminata	Moore	1884	Y	2017-04-28
Eupterotidae	Eupterotinae				Eupterote			mollifera		flava	Moore	1884	N	2017-04-28
Eupterotidae	Eupterotinae				Eupterote			mollifera		flavia	Hampson	1891	Y	2017-04-28
Eupterotidae	Eupterotinae				Eupterote			mollifera		lativittata	Moore	1884	Y	2017-04-28
Eupterotidae	Eupterotinae				Eupterote			mollifera		mollis	Moore	1884	Y	2017-04-28
Eupterotidae	Eupterotinae				Eupterote			mollifera		niligirica	Moore	1879	Y	2017-04-28
Eupterotidae	Eupterotinae				Eupterote			mollifera		ornata	Felder, C. & Felder, R.	1874	N	2017-04-28
Eupterotidae	Eupterotinae				Eupterote			mollifera		rectifascia	Hampson	1891	Y	2017-04-28
Eupterotidae	Eupterotinae				Eupterote			mollifera		rufodisca	Hampson	1891	Y	2017-04-28
Eupterotidae	Eupterotinae				Eupterote			mollifera	contrastica		Bryk	1944		2017-04-28
Eupterotidae	Eupterotinae				Eupterote			multiarcuata			Holloway	1976	Y	2018-01-18
Eupterotidae	Eupterotinae				Eupterote			muluana			Holloway	1987		2017-04-28
Eupterotidae	Eupterotinae				Eupterote			murina			Moore	1877	N	2017-06-30
Eupterotidae	Eupterotinae				Eupterote			naessigi			Holloway	1987		2017-04-28
Eupterotidae	Eupterotinae				Eupterote			niassana			Rothschild	1917		2017-04-28
Eupterotidae	Eupterotinae				Eupterote			niassana	weberi		Holloway	1976		2017-04-28
Eupterotidae	Eupterotinae				Eupterote			nigriceps			Hampson	1893	N	2017-04-28
Eupterotidae	Eupterotinae				Eupterote			nobilis			Bryk	1944		2017-04-28
Eupterotidae	Eupterotinae				Eupterote			nobilis	insulindica		Bryk	1944		2017-04-28
Eupterotidae	Eupterotinae				Eupterote			obsoleta			Talbot	1926		2017-04-28
Eupterotidae	Eupterotinae				Eupterote			olivescens			Rothschild	1920	Y	2018-01-18
Eupterotidae	Eupterotinae				Eupterote			orientalis			Fabricius	17??	N	2017-04-28
Eupterotidae	Eupterotinae				Eupterote			orientalis		aenescens	Moore	1879	N	2017-04-28
Eupterotidae	Eupterotinae				Eupterote			orientalis		plumipes	Walker	1855	N	2017-04-28
Eupterotidae	Eupterotinae				Eupterote			orientalis		quadrifasciata	Moore	1879	N	2017-04-28
Eupterotidae	Eupterotinae				Eupterote			orientalis		rubiginosa	Walker	1855		2017-04-28
Eupterotidae	Eupterotinae				Eupterote			pandya			Moore	[1866]	N	2017-04-28
Eupterotidae	Eupterotinae				Eupterote			pandya		acheron	Mell	1930	N	2017-04-28
Eupterotidae	Eupterotinae				Eupterote			pandya		pallida	Butler	1881	N	2017-04-28
Eupterotidae	Eupterotinae				Eupterote			patula			Walker	1855	N	2017-04-28
Eupterotidae	Eupterotinae				Eupterote			patula		abnorminervis	Strand	1924		2017-04-28	infrasubspecific
Eupterotidae	Eupterotinae				Eupterote			patula		dehyalinata	Strand	1924		2017-04-28	infrasubspecific
Eupterotidae	Eupterotinae				Eupterote			patula		khasiana	Moore	1879	N	2017-04-28
Eupterotidae	Eupterotinae				Eupterote			patula		undulosa	Walker	1855	N	2017-04-28
Eupterotidae	Eupterotinae				Eupterote			petola			Moore	1860		2017-04-28
Eupterotidae	Eupterotinae				Eupterote			radiata			Walker	1866		2017-04-28
Eupterotidae	Eupterotinae				Eupterote			rothschildi			Strand	1924		2017-04-28
Eupterotidae	Eupterotinae				Eupterote			sapivora			Yang	19??		2017-04-28
Eupterotidae	Eupterotinae				Eupterote			splendens			Nässig & Schulze	2007	Y	2017-04-28
Eupterotidae	Eupterotinae				Eupterote			testacea			Walker	1855	N	2017-04-28
Eupterotidae	Eupterotinae				Eupterote			todara			Moore	1884	Y	2017-04-28
Eupterotidae	Eupterotinae				Eupterote			translata			Swinhoe	1885	N	2017-04-28
Eupterotidae	Eupterotinae				Eupterote			udiana			Moore	1860		2017-04-28
Eupterotidae	Eupterotinae				Eupterote			undans			Walker	1855	N	2017-04-28
Eupterotidae	Eupterotinae				Eupterote			undata			Blanchard	1853	N	2017-11-10
Eupterotidae	Eupterotinae				Eupterote			undata		affinis	Moore	1884	Y	2017-11-10
Eupterotidae	Eupterotinae				Eupterote			undata		caliginosa	Moore	1884	Y	2017-11-10
Eupterotidae	Eupterotinae				Eupterote			undata		castanoptera	Moore	1884	Y	2017-11-10
Eupterotidae	Eupterotinae				Eupterote			undata		cinnamomea	Moore	1884	Y	2017-11-10
Eupterotidae	Eupterotinae				Eupterote			undata		consimilis	Moore	1884	Y	2017-11-10
Eupterotidae	Eupterotinae				Eupterote			undata		cupreipennis	Moore	1884	Y	2017-11-10
Eupterotidae	Eupterotinae				Eupterote			undata		decorata	Moore	1884	Y	2017-11-10
Eupterotidae	Eupterotinae				Eupterote			undata		diabolica	Swinhoe	1885	Y	2017-11-10
Eupterotidae	Eupterotinae				Eupterote			undata		dissimilis	Moore	1884	Y	2017-11-10
Eupterotidae	Eupterotinae				Eupterote			undata		fraterna	Moore	1884	N	2017-11-10
Eupterotidae	Eupterotinae				Eupterote			undata		griseipennis	Moore	1884	Y	2017-11-10
Eupterotidae	Eupterotinae				Eupterote			undata		hirsuta	Swinhoe	1891	Y	2017-11-10
Eupterotidae	Eupterotinae				Eupterote			undata		ignavus	Swinhoe	1886	Y	2017-11-10
Eupterotidae	Eupterotinae				Eupterote			undata		imbecilis	Walker	1855	N	2017-11-10
Eupterotidae	Eupterotinae				Eupterote			undata		invalida	Butler	1881	Y	2017-11-10
Eupterotidae	Eupterotinae				Eupterote			undata		jaresia	Swinhoe	18??	Y	2017-11-10
Eupterotidae	Eupterotinae				Eupterote			undata		nigricans	Moore	1884	Y	2017-11-10
Eupterotidae	Eupterotinae				Eupterote			undata		persimilis	Moore	1884	Y	2017-11-10
Eupterotidae	Eupterotinae				Eupterote			undata		similis	Moore	1883	N	2017-11-10
Eupterotidae	Eupterotinae				Eupterote			undata		sinuata	Moore	1884	Y	2017-11-10
Eupterotidae	Eupterotinae				Eupterote			undata		subdita	Moore	1884	Y	2017-11-10
Eupterotidae	Eupterotinae				Eupterote			undata		suffusa	Moore	1884	Y	2017-11-10
Eupterotidae	Eupterotinae				Eupterote			undata		taooensis	Moore	1884	Y	2017-11-10
Eupterotidae	Eupterotinae				Eupterote			undata		undifera	Walker	1855	N	2017-11-10
Eupterotidae	Eupterotinae				Eupterote			undata		variegata	Moore	1884	Y	2017-11-10
Eupterotidae	Eupterotinae				Eupterote			undata		vinosa	Moore	1884	Y	2017-11-10
Eupterotidae	Eupterotinae				Eupterote			unicolor			Hampson	1891	Y	2018-01-18
Eupterotidae	Eupterotinae				Eupterote			vialis			Moore	1879	N	2017-04-28
Eupterotidae	Eupterotinae				Lasiomorpha						Joicey & Talbot	1916	-	2017-04-28
Eupterotidae	Eupterotinae				Lasiomorpha			meeki			Rothschild	1917		2017-04-28
Eupterotidae	Eupterotinae				Lasiomorpha			noakesi			Joicey & Talbot	1916	Y	2017-04-28
Eupterotidae	Eupterotinae				Melanergon						Bethune-Baker	1904	-	2017-04-28
Eupterotidae	Eupterotinae				Melanergon			vidua			Walker	1865	N	2017-04-28
Eupterotidae	Eupterotinae				Melanergon			vidua		fergussonis	Rothschild	1917		2017-04-28
Eupterotidae	Eupterotinae				Melanergon			vidua		louisiadensis	Rothschild	1917		2017-04-28
Eupterotidae	Eupterotinae				Melanergon			vidua		proserpina	Bethune-Baker	1904	Y	2017-04-28
Eupterotidae	Eupterotinae				Nisaga						Walker	1855	-	2017-04-28
Eupterotidae	Eupterotinae				Nisaga			rufescens			Hampson	1895		2017-04-28
Eupterotidae	Eupterotinae				Nisaga			simplex			Walker	1855	Y	2017-04-28
Eupterotidae	Eupterotinae				Nisaga			simplex		modesta	Moore	1884	Y	2017-04-28
Eupterotidae	Eupterotinae				Palirisa						Moore	1884	-	2017-04-28
Eupterotidae	Eupterotinae				Palirisa			archivicina			Bryk	1944		2017-04-28
Eupterotidae	Eupterotinae				Palirisa			cervina			Moore	[1866]	N	2017-09-20
Eupterotidae	Eupterotinae				Palirisa			cervina		burmanica	Strand	1924		2017-04-28
Eupterotidae	Eupterotinae				Palirisa			cervina	annamensis		Mell	1930	Y	2017-05-30
Eupterotidae	Eupterotinae				Palirisa			cervina	birmana		Bryk	1944		2017-04-28
Eupterotidae	Eupterotinae				Palirisa			cervina	formosana		Matsumura	1931		2017-04-28
Eupterotidae	Eupterotinae				Palirisa			cervina	renei		Bryk	1944		2017-04-28
Eupterotidae	Eupterotinae				Palirisa			lineosa			Walker	1855	N	2017-04-28
Eupterotidae	Eupterotinae				Palirisa			lineosa	noncurvata		Bryk	1944		2017-04-28
Eupterotidae	Eupterotinae				Palirisa			mandarina			Leech	1898	N	2017-04-28
Eupterotidae	Eupterotinae				Palirisa			mosoensis			Mell	1937		2017-04-28
Eupterotidae	Eupterotinae				Palirisa			mosoensis		angustifasciata	Mell	1937		2017-05-19	infrasubspecific
Eupterotidae	Eupterotinae				Palirisa			mosoensis		chocolatina	Mell	1937		2017-05-19	infrasubspecific
Eupterotidae	Eupterotinae				Palirisa			mosoensis		curvilineata	Mell	1937		2017-05-19	infrasubspecific
Eupterotidae	Eupterotinae				Palirisa			mosoensis		roseitincta	Mell	1937		2017-05-19	infrasubspecific
Eupterotidae	Eupterotinae				Palirisa			mosoensis		significata	Mell	1937		2017-05-19	infrasubspecific
Eupterotidae	Eupterotinae				Palirisa			rotundala			Mell	1930	Y	2017-04-28
Eupterotidae	Eupterotinae				Palirisa			salex			Pugaev & Than Thieu	2011		2017-04-28
Eupterotidae	Eupterotinae				Palirisa			sinensis			Rothschild	1917	Y	2017-04-28
Eupterotidae	Eupterotinae				Palirisa			taipeishanis			Mell	1937		2017-04-28
Eupterotidae	Eupterotinae				Paracydas						Bethune-Baker	1908	-	2017-04-28
Eupterotidae	Eupterotinae				Paracydas			biagi			Bethune-Baker	1908	Y	2017-04-28
Eupterotidae	Eupterotinae				Paracydas			biagi	occidentalis		Rothschild	1932		2017-04-28
Eupterotidae	Eupterotinae				Paracydas			postpallida			Rothschild	1917		2017-04-28
Eupterotidae	Eupterotinae				Rarisquamosa						Bethune-Baker	1910	-	2017-04-28
Eupterotidae	Eupterotinae				Rarisquamosa			arfaki			Bethune-Baker	1910	Y	2017-04-28
Eupterotidae	Eupterotinae				Sangatissa						Moore	[1883]	-	2017-04-28
Eupterotidae	Eupterotinae				Sangatissa			subcurvifera			Walker	1865	N	2017-04-28
Eupterotidae	Eupterotinae				Sangatissa			subcurvifera		albipars	Moore	1884	Y	2017-04-28
Eupterotidae	Eupterotinae				Sangatissa			subcurvifera		citrinula	Walker	1865	N	2017-04-28
Eupterotidae	Eupterotinae				Sangatissa			subcurvifera		teta	Swinhoe	18??		04/28/2017
Eupterotidae	Eupterotinae				Sangatissa			subcurvifera		transeriata	Butler	1875	N	2017-04-28
Eupterotidae	Eupterotinae				Sphingognatha						Felder, C. & Felder, R.	1874	-	2017-04-28
Eupterotidae	Eupterotinae				Sphingognatha			asclepiades			Felder, C. & Felder, R.	1874	Y	2017-04-28
Eupterotidae	Eupterotinae				Sphingognatha			pallida			Walker	1855	N	2017-04-28
Eupterotidae	Eupterotinae				Sphingognatha			strix			Bryk	1944		2017-04-28
Eupterotidae	Ganisa-Group										-	-	-	2017-04-28
Eupterotidae	Ganisa-Group				Apha						Walker	1855	-	2017-04-28
Eupterotidae	Ganisa-Group				Apha		Preptothauma				Draudt	1931	-	2017-06-12
Eupterotidae	Ganisa-Group				Apha			aequalis			Felder, C. & Felder, R.	1874		2017-04-28
Eupterotidae	Ganisa-Group				Apha			aequalis		tychoona	Butler	1878	Y	2017-04-28
Eupterotidae	Ganisa-Group				Apha			aequalis	hoenei		Mell	1937		2017-04-28
Eupterotidae	Ganisa-Group				Apha			arisana			Matsumura	1927	Y	2017-04-28
Eupterotidae	Ganisa-Group				Apha			floralis			Butler	1881	Y	2017-04-28
Eupterotidae	Ganisa-Group				Apha			horishana			Matsumura	1927		2017-04-28
Eupterotidae	Ganisa-Group				Apha			horishana		tychoonoides	Mell	1930	Y	2017-04-28
Eupterotidae	Ganisa-Group				Apha			huabeiana			Yang	1978		2017-04-28
Eupterotidae	Ganisa-Group				Apha			kantonensis			Mell	1930	Y	2017-04-28
Eupterotidae	Ganisa-Group				Apha			lanuginosa			Walker	1862	Y	2017-06-30	nomen oblitum?
Eupterotidae	Ganisa-Group				Apha			oxydiata			Draudt	1931	N	2017-04-28
Eupterotidae	Ganisa-Group				Apha			subdives			Walker	1855	Y	2017-04-28
Eupterotidae	Ganisa-Group				Apha			subdives	yunnanensis		Mell	1937		2017-04-28
Eupterotidae	Ganisa-Group				Apona						Walker	1856	-	2017-04-28
Eupterotidae	Ganisa-Group				Apona		Pachyclea				Gistl	1857	-	2017-06-12
Eupterotidae	Ganisa-Group				Apona			caschmirensis			Kollar	[1844]	N	2017-04-28
Eupterotidae	Ganisa-Group				Apona			caschmirensis		major	Rothschild	1917		2017-04-28
Eupterotidae	Ganisa-Group				Apona			caschmirensis		pallida	Walker	1856	Y	2017-04-28
Eupterotidae	Ganisa-Group				Apona			chasiana			Swinhoe	18??		04/28/2017
Eupterotidae	Ganisa-Group				Apona			frater			Rothschild	1917		2017-04-28
Eupterotidae	Ganisa-Group				Apona			fuliginosa			Kishida	1993		2017-04-28
Eupterotidae	Ganisa-Group				Apona			gyraleus			Orhant	2000		2017-04-28
Eupterotidae	Ganisa-Group				Apona			ligustri			Mell	1930	Y	2017-04-28
Eupterotidae	Ganisa-Group				Apona			plumosa			Moore	1872	Y	2017-04-28
Eupterotidae	Ganisa-Group				Apona			ronaldi			Bethune-Baker	1927		2017-04-28
Eupterotidae	Ganisa-Group				Apona			shevaroyensis			Moore	1884	Y	2017-04-28
Eupterotidae	Ganisa-Group				Apona			yuennanensis			Mell	1930	Y	2017-05-30
Eupterotidae	Ganisa-Group				Apona			yuennanensis	alticola		Mell	1937	Y	2017-05-30
Eupterotidae	Ganisa-Group				Ganisa						Walker	1855	-	2017-04-28
Eupterotidae	Ganisa-Group				Ganisa			cyanogrisea			Mell	1930	Y	2017-05-18
Eupterotidae	Ganisa-Group				Ganisa			cyanogrisea		pallidior	Mell	1930	Y	2017-05-30	infrasubspecific
Eupterotidae	Ganisa-Group				Ganisa			floresiaca			Nässig	2009	Y	2017-04-28
Eupterotidae	Ganisa-Group				Ganisa			formosicola			Matsumura	1931		2017-04-28
Eupterotidae	Ganisa-Group				Ganisa			javana			Holloway	1982		2017-04-28
Eupterotidae	Ganisa-Group				Ganisa			longipennata			Mell	1958		2017-04-28
Eupterotidae	Ganisa-Group				Ganisa			plana			Walker	1855	Y	2017-04-28
Eupterotidae	Ganisa-Group				Ganisa			plana		melli	Bryk	1944		2017-04-28
Eupterotidae	Ganisa-Group				Ganisa			plana		monotonica	Strand	1924		2017-05-19	infrasubspecific
Eupterotidae	Ganisa-Group				Ganisa			plana		nigromaculifera	Strand	1924		2017-05-19	infrasubspecific
Eupterotidae	Ganisa-Group				Ganisa			plana	kuangtungensis		Mell	1930	Y	2017-04-28
Eupterotidae	Ganisa-Group				Ganisa			plana	lignea		Mell	19??		04/28/2017
Eupterotidae	Ganisa-Group				Ganisa			plana	wilhelminae		Bryk	1944		2017-04-28
Eupterotidae	Ganisa-Group				Ganisa			plana	yunnanensis		Mell	19??		04/28/2017
Eupterotidae	Ganisa-Group				Ganisa			postica			Walker	1855	Y	2017-04-28
Eupterotidae	Ganisa-Group				Ganisa			pulupuluana			Nässig, Ignatyev & Witt	2009	Y	2017-04-28
Eupterotidae	Ganisa-Group				Ganisa			similis			Moore	1884	Y	2017-04-28
Eupterotidae	Ganisa-Group				Hemijana			variegata			Rothschild	1917		2017-05-19	incertae sedis
Eupterotidae	Ganisa-Group				Melanothrix						Felder, C. & Felder, R.	1874	-	2017-04-28
Eupterotidae	Ganisa-Group				Melanothrix			alternans			Pagenstecher	1890		2017-04-28
Eupterotidae	Ganisa-Group				Melanothrix			alternans		homochroa	Grünberg	1914		2017-04-28
Eupterotidae	Ganisa-Group				Melanothrix			fumosa			Swinhoe	1905	Y	2017-04-28
Eupterotidae	Ganisa-Group				Melanothrix			fumosa		xanthomelas	Grünberg	1914		2017-04-28
Eupterotidae	Ganisa-Group				Melanothrix			latevittata			Grünberg	1914		2017-04-28
Eupterotidae	Ganisa-Group				Melanothrix			leucotrigona			Hampson	[1893]	Y	2017-04-28
Eupterotidae	Ganisa-Group				Melanothrix			leucotrigona	intermedia		Rothschild	1917		2017-04-28
Eupterotidae	Ganisa-Group				Melanothrix			leucotrigona	nicevillei		Hampson	1896		2017-04-28
Eupterotidae	Ganisa-Group				Melanothrix			nymphalaria			Walker	1866	N	2017-04-28
Eupterotidae	Ganisa-Group				Melanothrix			nymphalaria		albidior	Rothschild	1910		2017-04-28
Eupterotidae	Ganisa-Group				Melanothrix			nymphalaria		atropurpurea	Aurivillius	1894		2017-04-28
Eupterotidae	Ganisa-Group				Melanothrix			nymphalaria		coryna	Swinhoe	1893		2017-04-28
Eupterotidae	Ganisa-Group				Melanothrix			nymphalaria		pulchricolor	Felder, C. & Felder, R.	1874	Y	2017-04-28
Eupterotidae	Ganisa-Group				Melanothrix			nymphalaria		radiata	Grünberg	1914		2017-04-28
Eupterotidae	Ganisa-Group				Melanothrix			nymphalaria		sundaensis	Holloway	1976		2017-04-28
Eupterotidae	Ganisa-Group				Melanothrix			philippina			Rothschild	1917		2017-04-28
Eupterotidae	Ganisa-Group				Melanothrix			sanchezi			Schultze	1925		2017-04-28
Eupterotidae	Ganisa-Group				Melanothrix			sanchezi		baletana	Schultze	1925		2017-04-28
Eupterotidae	Ganisa-Group				Melanothrix			semperi			Rothschild	1917		2017-04-28
Eupterotidae	Ganisa-Group				Neopreptos						Draudt	1930	-	2017-04-28
Eupterotidae	Ganisa-Group				Neopreptos			clazomenia			Druce	1886	N	2017-04-28
Eupterotidae	Ganisa-Group				Neopreptos			marathusa			Druce		N	2017-04-28
Eupterotidae	Ganisa-Group				Pandala						Walker	1855	-	2017-04-28
Eupterotidae	Ganisa-Group				Pandala			dolosa			Walker	1855	Y	2017-04-28
Eupterotidae	Ganisa-Group				Poloma						Walker	1855	-	2017-04-28
Eupterotidae	Ganisa-Group				Poloma		Sarvena				Walker	1865	-	2017-04-28
Eupterotidae	Ganisa-Group				Poloma			angulata			Walker	1855	Y	2017-04-28
Eupterotidae	Ganisa-Group				Poloma			angulata		incompleta	Walker	1865		2017-04-28
Eupterotidae	Ganisa-Group				Poloma			angulata		janula	Felder, C. & Felder, R.	1874		2017-04-28
Eupterotidae	Ganisa-Group				Poloma			castanea			Aurivillius	1901		2017-04-28
Eupterotidae	Ganisa-Group				Poloma			incompta			Walker	1865		2017-04-28
Eupterotidae	Ganisa-Group				Poloma			nigromaculata			Aurivillius	1893		2017-04-28
Eupterotidae	Ganisa-Group				Poloma			nigromaculata		nahor	Druce	1886		2017-04-28
Eupterotidae	Ganisa-Group				Preptos						Schaus	1892	-	2017-04-28
Eupterotidae	Ganisa-Group				Preptos			hidalgoensis			Beutelspacher-Baigts	1983	Y	2017-04-28
Eupterotidae	Ganisa-Group				Preptos			oropus			Schaus	1892	Y	2017-04-28
Eupterotidae	Ganisa-Group				Preptos			oropus	corax		Druce	1893	N	2017-04-28
Eupterotidae	Ganisa-Group				Pseudoganisa						Schultze	1910	-	2017-04-28
Eupterotidae	Ganisa-Group				Pseudoganisa			currani			Schultze	1910	Y	2017-04-28
Eupterotidae	Ganisa-Group				Pseudoganisa			gonioptera			West	1932		2017-04-28
Eupterotidae	Ganisa-Group				Pseudojana						Hampson	1893	-	2017-04-28
Eupterotidae	Ganisa-Group				Pseudojana			bicostata			Yang & Chen	1995		2017-04-28
Eupterotidae	Ganisa-Group				Pseudojana			clemensi			Schultze	1907		2017-04-28
Eupterotidae	Ganisa-Group				Pseudojana			floresina			Nässig & Bouyer	2010	Y	2017-04-28
Eupterotidae	Ganisa-Group				Pseudojana			incandescens			Walker	1855	N	2017-04-28
Eupterotidae	Ganisa-Group				Pseudojana			obscura			Holloway	1987		2017-04-28
Eupterotidae	Ganisa-Group				Pseudojana			pallidipennis			Hampson	1895		2017-04-28
Eupterotidae	Ganisa-Group				Pseudojana			pallidipennis		grandis	Rothschild	1917		2017-04-28
Eupterotidae	Ganisa-Group				Pseudojana			perspicuifascia			Rothschild	1917		2017-04-28
Eupterotidae	Ganisa-Group				Pseudojana			perspicuifascia		niassana	Rothschild	1917		2017-04-28
Eupterotidae	Ganisa-Group				Pseudojana			roepkei			Nieuwenhuis	1948		2017-04-28
Eupterotidae	Ganisa-Group				Pseudojana			vitalisi			Candèze	1927		2017-04-28
Eupterotidae	Janinae										Aurivillius	1892	-	2017-04-28
Eupterotidae	Janinae			Hibrildinae							Berger	1958	-	2017-04-28
Eupterotidae	Janinae			Tissangini							Forbes	1955	-	2017-04-28
Eupterotidae	Janinae				Acrojana						Aurivillius	1901	-	2017-04-28
Eupterotidae	Janinae				Acrojana			rosacea			Butler	1874	N	2017-04-28
Eupterotidae	Janinae				Acrojana			salmonea			Rothschild	1932		2017-04-28
Eupterotidae	Janinae				Acrojana			sciron			Druce	1887	N	2017-04-28
Eupterotidae	Janinae				Acrojana			sciron		ochracea	Strand	19??		05/19/2017	infrasubspecific
Eupterotidae	Janinae				Acrojana			scutaea			Strand	1909		2017-04-28
Eupterotidae	Janinae				Acrojana			scutaea		sanguinipes	Strand	1910		2017-05-19	infrasubspecific
Eupterotidae	Janinae				Acrojana			simillima			Rothschild	1932		2017-04-28
Eupterotidae	Janinae				Acrojana			splendida			Rothschild	1917		2017-04-28
Eupterotidae	Janinae				Camerunia						Aurivillius	1893	-	2017-04-28
Eupterotidae	Janinae				Camerunia			albida			Aurivillius	1901		2017-04-28
Eupterotidae	Janinae				Camerunia			flava			Aurivillius	1904		2017-04-28
Eupterotidae	Janinae				Camerunia			flava		lactiflora	Wichgraf	1914		2017-04-28
Eupterotidae	Janinae				Camerunia			orphne			Schaus	1893		2017-04-28
Eupterotidae	Janinae				Camerunia			orphne		insignis	Aurivillius	1893	Y	2017-04-28
Eupterotidae	Janinae				Catajana						Strand	1910	-	2017-04-28
Eupterotidae	Janinae				Catajana			bimaculata			Dewitz	1879		2017-04-28
Eupterotidae	Janinae				Drepanojana						Aurivillius	1893	-	2017-04-28
Eupterotidae	Janinae				Drepanojana			fasciata			Aurivillius	1893	Y	2017-04-28
Eupterotidae	Janinae				Drepanojana			fasciata		apicalis	Aurivillius	19??		04/28/2017
Eupterotidae	Janinae				Drepanojana			fasciata		maeonia	Druce	19??		04/28/2017
Eupterotidae	Janinae				Epijana						Holland	1893	-	2017-04-28
Eupterotidae	Janinae				Epijana			cosima			Plötz	1880		2017-09-19
Eupterotidae	Janinae				Epijana			cosima		lanosa	Holland	1893	Y	2017-09-19
Eupterotidae	Janinae				Epijana			cosima		velutonia	Druce	1896		2017-09-19
Eupterotidae	Janinae				Epijana			latifascia			Dall'Asta & Poncin	1980	Y	2017-04-28
Eupterotidae	Janinae				Epijana			meridionalis			Dall'Asta & Poncin	1980	Y	2017-04-28
Eupterotidae	Janinae				Epijana			vingerhoedti			Bouyer	2012	Y	2017-04-28
Eupterotidae	Janinae				Gonojana						Aurivillius	1893	-	2017-04-28
Eupterotidae	Janinae				Gonojana			dimidiata			Aurivillius	1893	Y	2017-04-28
Eupterotidae	Janinae				Gonojana			dimidiata		tenuis	Holland	18??		04/28/2017
Eupterotidae	Janinae				Gracilanja						Bouyer	2011	-	2017-05-19
Eupterotidae	Janinae				Gracilanja			gracilis			Walker	1855	-	2017-04-28
Eupterotidae	Janinae				Gracilanja			gracilis		grisea	Berio	1937	N	2017-05-19	infrasubspecific
Eupterotidae	Janinae				Gracilanja			gracilis		rosea	Berio	1937	N	2017-05-19	infrasubspecific
Eupterotidae	Janinae				Gracilanja			polymorpha			Aurivillius	1893	N	2017-04-28
Eupterotidae	Janinae				Hemijana						Aurivillius	1901	-	2017-04-28
Eupterotidae	Janinae				Hemijana			griseola			Rothschild	1917		2017-04-28
Eupterotidae	Janinae				Hemijana			semijana			Aurivillius	1893		2017-04-28
Eupterotidae	Janinae				Hemijana			semijana		distincta	Berio	1937		2017-05-19	infrasubspecific
Eupterotidae	Janinae				Hemijana			subrosea			Aurivillius	1893	N	2017-04-28
Eupterotidae	Janinae				Hemijana			subrosea		ruberrima	Rothschild	1917		2017-04-28
Eupterotidae	Janinae				Hibrildes						Druce	1888	-	2017-05-30
Eupterotidae	Janinae				Hibrildes		Anengya				Karsch	1895	-	2017-04-28
Eupterotidae	Janinae				Hibrildes			crawshayi			Butler	1896		2017-04-28
Eupterotidae	Janinae				Hibrildes			crawshayi		albescens	Joicey & Talbot	1924		2017-04-28
Eupterotidae	Janinae				Hibrildes			crawshayi		albopunctata	Bethune-Baker	1915		2017-04-28
Eupterotidae	Janinae				Hibrildes			crawshayi		ansorgei	Kirby	1896		2017-04-28
Eupterotidae	Janinae				Hibrildes			crawshayi		bicolor	Talbot	1928		2017-04-28
Eupterotidae	Janinae				Hibrildes			crawshayi		fuscata	Hering	1926		2017-04-28
Eupterotidae	Janinae				Hibrildes			crawshayi		neavi	Hampson	1910		2017-04-28
Eupterotidae	Janinae				Hibrildes			crawshayi		venosa	Kirby	1896		2017-04-28
Eupterotidae	Janinae				Hibrildes			norax			Druce	1888	Y	2017-04-28
Eupterotidae	Janinae				Hibrildes			norax		carpenteri	Poulton	1929		2017-04-28
Eupterotidae	Janinae				Hibrildes			norax		sheffieldi	Poulton	1929		2017-04-28
Eupterotidae	Janinae				Hibrildes			norax		spiritalis	Karsch	1895		2017-04-28
Eupterotidae	Janinae				Hoplojana						Aurivillius	1901	-	2017-04-28
Eupterotidae	Janinae				Hoplojana			indecisa			Aurivillius	1901	Y	2017-04-28
Eupterotidae	Janinae				Hoplojana			watsoni			Berger	1980	N	2017-04-28
Eupterotidae	Janinae				Jana						Herrich-Schäffer	[1854]	-	2017-04-28
Eupterotidae	Janinae				Jana			ampla			Berger	1980		2017-04-28
Eupterotidae	Janinae				Jana			anyagudae			Stoneham	1966		2017-04-28
Eupterotidae	Janinae				Jana			basoko			Berger	1980		2017-04-28
Eupterotidae	Janinae				Jana			caesarea			Weymer	1909		2017-04-28
Eupterotidae	Janinae				Jana			demoulini			Berger	1980		2017-04-28
Eupterotidae	Janinae				Jana			dulcinea			Stoneham	1966		2017-04-28
Eupterotidae	Janinae				Jana			eurymas			Herrich-Schäffer	1854	Y	2017-04-28
Eupterotidae	Janinae				Jana			fletcheri			Berger	1980		2017-04-28
Eupterotidae	Janinae				Jana			fontainei			Berger	1980		2017-04-28
Eupterotidae	Janinae				Jana			forbesi			Berger	1980		2017-04-28
Eupterotidae	Janinae				Jana			gaitea			Stoneham	1966		2017-04-28
Eupterotidae	Janinae				Jana			germana			Rothschild	1917	Y	2017-12-11
Eupterotidae	Janinae				Jana			hecqui			Berger	1980		2017-04-28
Eupterotidae	Janinae				Jana			jeanae			Stoneham	1966		2017-04-28
Eupterotidae	Janinae				Jana			kivuensis			Berger	1980		2017-04-28
Eupterotidae	Janinae				Jana			nigrorufa			Berger	1980		2017-04-28
Eupterotidae	Janinae				Jana			overlaeti			Berger	1980		2017-04-28
Eupterotidae	Janinae				Jana			plagiatus			Berger	1980		2017-04-28
Eupterotidae	Janinae				Jana			preciosa			Aurivillius	1893		2017-04-28
Eupterotidae	Janinae				Jana			propinquestria			Strand	1911		2017-04-28
Eupterotidae	Janinae				Jana			pujoli			Berger	1980		2017-04-28
Eupterotidae	Janinae				Jana			roseata			Rothschild	1917		2017-04-28
Eupterotidae	Janinae				Jana			rustica			Strand	1911		2017-04-28
Eupterotidae	Janinae				Jana			seydeli			Berger	1980		2017-04-28
Eupterotidae	Janinae				Jana			transvaalica			Strand	1911		2017-04-28
Eupterotidae	Janinae				Jana			tripunctata			Aurivillius	1897		2017-04-28
Eupterotidae	Janinae				Jana			vandeschricki			Berger	1980		2017-04-28
Eupterotidae	Janinae				Jana			viettei			Berger	1980		2017-04-28
Eupterotidae	Janinae				Jana			yokoana			Bethune-Baker	1927		2017-04-28
Eupterotidae	Janinae				Malagasanja						Bouyer	2011	-	2017-04-28
Eupterotidae	Janinae				Malagasanja			palliatella			Viette	1955	N	2017-04-28
Eupterotidae	Janinae				Murphyana						Bouyer	2012	-	2017-04-28
Eupterotidae	Janinae				Murphyana			bamendana			Darge	2013	Y	2017-04-28
Eupterotidae	Janinae				Murphyana			bouyeriana			Darge	2013	Y	2017-04-28
Eupterotidae	Janinae				Murphyana			hausmanni			Darge	2013	Y	2017-04-28
Eupterotidae	Janinae				Murphyana			magambana			Darge	2013	Y	2017-04-28
Eupterotidae	Janinae				Murphyana			rayi			Bouyer	2012	Y	2017-04-28
Eupterotidae	Janinae				Murphyana			sommereri			Darge	2013	Y	2017-04-28
Eupterotidae	Janinae				Parajana						Aurivillius	1906	-	2017-04-28
Eupterotidae	Janinae				Parajana			gabunica			Aurivillius	1892	N	2017-04-28
Eupterotidae	Janinae				Parajana			gabunica		marmorata	Holland	1893	N	2017-04-28
Eupterotidae	Janinae				Parajana			lamani			Aurivillius	1906	Y	2017-05-18
Eupterotidae	Janinae				Pterocerota						Hampson	1905	-	2017-04-28
Eupterotidae	Janinae				Pterocerota			virginea			Hampson	1905	Y	2017-04-28
Eupterotidae	Janinae				Rhodopteriana						Bouyer	2011	-	2017-04-28
Eupterotidae	Janinae				Rhodopteriana			abyssinica			Rothschild	1917	N	2017-04-28
Eupterotidae	Janinae				Rhodopteriana			anaemica			Hampson	1910	N	2017-04-28
Eupterotidae	Janinae				Rhodopteriana			distincta			Rothschild	1917	N	2017-04-28
Eupterotidae	Janinae				Rhodopteriana			funebris			Gaede	1927	N	2017-04-28
Eupterotidae	Janinae				Rhodopteriana			geita			Darge	2013	Y	2017-04-28
Eupterotidae	Janinae				Rhodopteriana			gishwatiana			Darge	2013	Y	2017-04-28
Eupterotidae	Janinae				Rhodopteriana			insignifica			Rothschild	1917	N	2017-04-28
Eupterotidae	Janinae				Rhodopteriana			iyayiana			Darge	2013	Y	2017-04-28
Eupterotidae	Janinae				Rhodopteriana			kataviana			Darge	2013	Y	2017-04-28
Eupterotidae	Janinae				Rhodopteriana			nakitomana			Darge	2013	Y	2017-04-28
Eupterotidae	Janinae				Rhodopteriana			obscura			Aurivillius	1893	N	2017-04-28
Eupterotidae	Janinae				Rhodopteriana			rhodoptera			Gerstaecker	1871	N	2017-04-28
Eupterotidae	Janinae				Rhodopteriana			roseobrunnea			Rothschild	1917	N	2017-04-28
Eupterotidae	Janinae				Rhodopteriana			rungwana			Darge	2013	Y	2017-04-28
Eupterotidae	Janinae				Rhodopteriana			salaamensis			Darge	2013	Y	2017-04-28
Eupterotidae	Janinae				Rhodopteriana			sidamoensis			Darge	2013	Y	2017-04-28
Eupterotidae	Janinae				Rhodopteriana			soricis			Rothschild	1917	N	2017-04-28
Eupterotidae	Janinae				Rhodopteriana			ulembwana			Darge	2013	Y	2017-04-28
Eupterotidae	Janinae				Stenoglene						Felder, C. & Felder, R.	1874	-	2017-04-28
Eupterotidae	Janinae				Stenoglene		Phasicnecus				Butler	1894	-	2017-04-28
Eupterotidae	Janinae				Stenoglene			basquini			Bouyer	2012		2017-04-28
Eupterotidae	Janinae				Stenoglene			bicolor			Distant	1897		2017-04-28
Eupterotidae	Janinae				Stenoglene			bipartita			Rothschild	1917		2017-04-28
Eupterotidae	Janinae				Stenoglene			bipunctatus			Aurivillius	1909		2017-04-28
Eupterotidae	Janinae				Stenoglene			brunneofasciata			Dall'Asta & Poncin	1980		2017-04-28
Eupterotidae	Janinae				Stenoglene			brunneus			Bouyer	2012		2017-04-28
Eupterotidae	Janinae				Stenoglene			cinerea			Holland	1893		2017-04-28
Eupterotidae	Janinae				Stenoglene			cinerea		maculifera	Strand	1912		2017-04-28
Eupterotidae	Janinae				Stenoglene			citrina			Druce	1886		2017-04-28
Eupterotidae	Janinae				Stenoglene			citrinoides			Dall'Asta & Poncin	1980		2017-04-28
Eupterotidae	Janinae				Stenoglene			clucki			Bouyer	2012		2017-04-28
Eupterotidae	Janinae				Stenoglene			dallastai			Bouyer	2012		2017-04-28
Eupterotidae	Janinae				Stenoglene			decellei			Dall'Asta & Poncin	1980		2017-04-28
Eupterotidae	Janinae				Stenoglene			decellei	flava		Dall'Asta & Poncin	1980		2017-04-28
Eupterotidae	Janinae				Stenoglene			dehanicus			Strand	1911		2017-04-28
Eupterotidae	Janinae				Stenoglene			dufranei			Bouyer	2012		2017-04-28
Eupterotidae	Janinae				Stenoglene			fontainei			Dall'Asta & Poncin	1980		2017-04-28
Eupterotidae	Janinae				Stenoglene			fouassini			Dall'Asta & Poncin	1980		2017-04-28
Eupterotidae	Janinae				Stenoglene			gemmatus			Wichgraf	1921		2017-04-28
Eupterotidae	Janinae				Stenoglene			giganteus			Rothschild	1917		2017-04-28
Eupterotidae	Janinae				Stenoglene			hilaris			Felder, C. & Felder, R.	1874		2017-04-28
Eupterotidae	Janinae				Stenoglene			hilaris		bithynia	Druce	1887		2017-04-28
Eupterotidae	Janinae				Stenoglene			inversus			Gaede	1927		2017-04-28
Eupterotidae	Janinae				Stenoglene			kenyensis			Bouyer	2012		2017-04-28
Eupterotidae	Janinae				Stenoglene			latimaculata			Dall'Asta & Poncin	1980		2017-04-28
Eupterotidae	Janinae				Stenoglene			leonardi			Bouyer	2012		2017-04-28
Eupterotidae	Janinae				Stenoglene			livingstonensis			Strand	1912		2017-04-28
Eupterotidae	Janinae				Stenoglene			morettoi			Bouyer	2012		2017-04-28
Eupterotidae	Janinae				Stenoglene			nivalis			Rothschild	1917		2017-04-28
Eupterotidae	Janinae				Stenoglene			noellae			Bouyer	2012		2017-04-28
Eupterotidae	Janinae				Stenoglene			obtusus			Walker	1864	N	2017-04-28
Eupterotidae	Janinae				Stenoglene			obtusus		aequidistans	Strand	1915		2017-04-28
Eupterotidae	Janinae				Stenoglene			obtusus		evanescens	Distant	1900		2017-04-28
Eupterotidae	Janinae				Stenoglene			obtusus		labda	Druce	1887		2017-04-28
Eupterotidae	Janinae				Stenoglene			obtusus		subcrocea	Distant	1900		2017-04-28
Eupterotidae	Janinae				Stenoglene			obtusus		tristis	Felder, R.	1868	N	2017-06-30
Eupterotidae	Janinae				Stenoglene			opalina			Druce	1910		2017-04-28
Eupterotidae	Janinae				Stenoglene			opalina		peropalinus	Rothschild	1917		2017-04-28
Eupterotidae	Janinae				Stenoglene			parvula			Dall'Asta & Poncin	1980		2017-04-28
Eupterotidae	Janinae				Stenoglene			paulisi			Dall'Asta & Poncin	1980		2017-04-28
Eupterotidae	Janinae				Stenoglene			pellucida			Joicey & Talbot	1924		2017-04-28
Eupterotidae	Janinae				Stenoglene			pellucida		novempunctatus	Bethune-Baker	1927		2017-04-28
Eupterotidae	Janinae				Stenoglene			perissinottoi			Bouyer	2012		2017-04-28
Eupterotidae	Janinae				Stenoglene			pira			Druce	1896		2017-04-28
Eupterotidae	Janinae				Stenoglene			plagiatus			Aurivillius	1911		2017-04-28
Eupterotidae	Janinae				Stenoglene			plagiatus		grandiplaga	Holland	1920		2017-04-28
Eupterotidae	Janinae				Stenoglene			plenevauxae			Bouyer	2012		2017-04-28
Eupterotidae	Janinae				Stenoglene			preussi			Aurivillius	1893		2017-04-28
Eupterotidae	Janinae				Stenoglene			pseudosygina			Bouyer & Basquin	2012		2017-04-28
Eupterotidae	Janinae				Stenoglene			pujoli			Dall'Asta & Poncin	1980		2017-04-28
Eupterotidae	Janinae				Stenoglene			purpurata			Wichgraf	1920		2017-04-28
Eupterotidae	Janinae				Stenoglene			purpurata		zernyi	Gschwandner	1923		2017-04-28
Eupterotidae	Janinae				Stenoglene			roseus			Druce	1886		2017-04-28
Eupterotidae	Janinae				Stenoglene			roseus		elgonae	Bethune-Baker	1927		2017-04-28
Eupterotidae	Janinae				Stenoglene			roseus		flavidior	Rothschild	1917		2017-04-28
Eupterotidae	Janinae				Stenoglene			roseus		gregorii	Butler	1894		2017-04-28
Eupterotidae	Janinae				Stenoglene			roseus		monteironis	Rothschild	1917		2017-04-28
Eupterotidae	Janinae				Stenoglene			roseus		pulverulentus	Joicey & Talbot	1924		2017-04-28
Eupterotidae	Janinae				Stenoglene			roseus		similis	Rothschild	1917		2017-04-28
Eupterotidae	Janinae				Stenoglene			shabae			Dall'Asta & Poncin	1980		2017-04-28
Eupterotidae	Janinae				Stenoglene			sinjaevi			Bouyer	2012		2017-04-28
Eupterotidae	Janinae				Stenoglene			sulphureoides			Kühne	2007		2017-04-28
Eupterotidae	Janinae				Stenoglene			sulphureotinctus			Strand	1912		2017-04-28
Eupterotidae	Janinae				Stenoglene			thelda			Druce	1887		2017-04-28
Eupterotidae	Janinae				Stenoglene			uelei			Dall'Asta & Poncin	1980		2017-04-28
Eupterotidae	Janinae				Stenoglene			uniformis			Dall'Asta & Poncin	1980		2017-04-28
Eupterotidae	Janinae				Striginiana						Bouyer	2011	-	2017-04-28
Eupterotidae	Janinae				Striginiana			agrippa			Weymer	1909	N	2017-04-28
Eupterotidae	Janinae				Striginiana			camerunica			Aurivillius	1893	N	2017-04-28
Eupterotidae	Janinae				Striginiana			nobilis			Holland	1893	N	2017-04-28
Eupterotidae	Janinae				Striginiana			pseudostrigina			Rothschild	1917	N	2017-04-28
Eupterotidae	Janinae				Striginiana			strigina			Westwood	1849	N	2017-04-28
Eupterotidae	Janinae				Tantaliana						Bouyer	2011	-	2017-04-28
Eupterotidae	Janinae				Tantaliana			crepax			Wallengren	1860	N	2017-04-28
Eupterotidae	Janinae				Tantaliana			nigristriata			Janse	1915	N	2017-04-28
Eupterotidae	Janinae				Tantaliana			signifera			Walker	1855	N	2017-04-28
Eupterotidae	Janinae				Tantaliana			tantalus			Herrich-Schäffer	[1854]	N	2017-04-28
Eupterotidae	Janinae				Tissanga						Aurivillius	1903	-	2017-04-28
Eupterotidae	Janinae				Tissanga			kiboriana			Basquin & Darge	2011	Y	2017-04-28
Eupterotidae	Janinae				Tissanga			murphyi			Bouyer	2012	Y	2017-04-28
Eupterotidae	Janinae				Tissanga			pretoriae			Distant	1892	N	2017-04-28
Eupterotidae	Janinae				Tissanga			zambiana			Darge & Minetti	2012	Y	2017-04-28
Eupterotidae	Janinae				Urojana						Gaede	1915	-	2017-04-28
Eupterotidae	Janinae				Urojana			eborea			Gaede	1915	Y	2017-04-28
Eupterotidae	Janinae				Vianga						Fletcher	1982	-	2017-06-12	nomen novum
Eupterotidae	Janinae				Vianga		Viana				Walker	1869	-	2017-06-12	junior homonym
Eupterotidae	Janinae				Vianga			crowleyi			Aurivillius	1904	N	2017-04-28
Eupterotidae	Janinae				Vianga			magnifica			Rothschild	1917	N	2017-04-28
Eupterotidae	Janinae				Vianga			tristis			Druce	1896	N	2017-04-28
Eupterotidae	Janinae				Vianga			velutina			Walker	1869	N	2017-04-28
Eupterotidae	Panacelinae										Forbes	1955	-	2017-04-28
Eupterotidae	Panacelinae				Panacela						Walker	1865	-	2017-04-28
Eupterotidae	Panacelinae				Panacela		Lewinibombyx				Strand	1929	-	2017-04-28
Eupterotidae	Panacelinae				Panacela		Mallodeta				Turner	1922	-	2017-05-18	junior homonym
Eupterotidae	Panacelinae				Panacela		Semuta				Walker	1865	-	2017-04-28
Eupterotidae	Panacelinae				Panacela			lewinae			Lewin	1807	N	2017-04-28
Eupterotidae	Panacelinae				Panacela			lewinae		hirta	Walker	1865	N	2017-04-28
Eupterotidae	Panacelinae				Panacela			lewinae		lewinii	Herrich-Schäffer	[1858]	N	2017-05-18	unjustified emendation
Eupterotidae	Panacelinae				Panacela			lewinae		pilosa	Walker	1865	N	2017-04-28
Eupterotidae	Panacelinae				Panacela			lewinae		pristina	Walker	1865	N	2017-04-28
Eupterotidae	Panacelinae				Panacela			lewinae		rufescens	Walker	1865	Y	2017-04-28
Eupterotidae	Panacelinae				Panacela			lewinae		simplex	Walker	1855	N	2017-04-28
Eupterotidae	Panacelinae				Panacela			lewinae		sobria	Walker	1855	N	2017-04-28
Eupterotidae	Panacelinae				Panacela			lewinae		transiens	Walker	1865	N	2017-04-28
Eupterotidae	Panacelinae				Panacela			nyctopa			Turner	1922	N	2017-04-28
Eupterotidae	Panacelinae				Panacela			syntropha			Turner	1922	Y	2017-04-28
Eupterotidae	Striphnopteryginae										Wallengren	1858	-	2017-04-28
Eupterotidae	Striphnopteryginae				Bantuana						Distant	1906	-	2017-04-28
Eupterotidae	Striphnopteryginae				Bantuana			cregoei			Distant	1906		2017-04-28
Eupterotidae	Striphnopteryginae				Cyrtojana						Aurivillius	1911	-	2017-04-28
Eupterotidae	Striphnopteryginae				Cyrtojana			trilineata			Aurivillius	1911	Y	2017-04-28
Eupterotidae	Striphnopteryginae				Cyrtojana			trilineata		apithana	Hering	1929		2017-04-28
Eupterotidae	Striphnopteryginae				Ebbepterote						Oberprieler, Nässig & Edwards	2003	-	2017-04-28
Eupterotidae	Striphnopteryginae				Ebbepterote			expansa			Lucas, T.P.	1891	N	2017-04-28
Eupterotidae	Striphnopteryginae				Ebbepterote			expansa		doddi	Turner	1911	N	2017-04-28
Eupterotidae	Striphnopteryginae				Euchera						Hübner	[1825]	-	2017-07-04
Eupterotidae	Striphnopteryginae				Euchera		Stibolepis				Butler	1878	-	2017-07-04
Eupterotidae	Striphnopteryginae				Euchera			abyssinica			Aurivillius	1904		2017-04-28
Eupterotidae	Striphnopteryginae				Euchera			albida			Plötz	1880	N	2017-07-04
Eupterotidae	Striphnopteryginae				Euchera			albida		abluta	Holland	1893	N	2017-07-04
Eupterotidae	Striphnopteryginae				Euchera			cunina			Cramer	1780	N	2017-07-04
Eupterotidae	Striphnopteryginae				Euchera			cunina		cunicaria	Hübner	[1825	Y	2017-07-04	unnecessary replacement name
Eupterotidae	Striphnopteryginae				Euchera			fervidaria			Fabricius	1787	N	2017-04-07
Eupterotidae	Striphnopteryginae				Euchera			fervidaria		nivea	Butler	1878	N	2017-07-04
Eupterotidae	Striphnopteryginae				Euchera			fervidaria		ochriventris	Strand	1911	N	2017-07-04
Eupterotidae	Striphnopteryginae				Janomima						Aurivillus	1901	-	2017-04-28
Eupterotidae	Striphnopteryginae				Janomima			aurivilliusi			Rothschild	1917		2017-04-28
Eupterotidae	Striphnopteryginae				Janomima			canthina			Janse	19??		04/28/2017
Eupterotidae	Striphnopteryginae				Janomima			dannfelti			Aurivillius	1893	N	2017-04-28
Eupterotidae	Striphnopteryginae				Janomima			dannfelti		claria	Strand	1911		2017-04-28
Eupterotidae	Striphnopteryginae				Janomima			dannfelti		deduplicata	Strand	1911		2017-04-28
Eupterotidae	Striphnopteryginae				Janomima			dannfelti		mesundulata	Strand	1911		2017-04-28
Eupterotidae	Striphnopteryginae				Janomima			dannfelti		ochrea	Gaede	1932		2017-04-28
Eupterotidae	Striphnopteryginae				Janomima			ibandana			Dall'Asta	1979		2017-04-28
Eupterotidae	Striphnopteryginae				Janomima			karschi			Weymer	1903		2017-04-28
Eupterotidae	Striphnopteryginae				Janomima			mariana			White	1843	N	2017-04-28
Eupterotidae	Striphnopteryginae				Janomima			mariana		nigricans	Gaede	1932		2017-04-28
Eupterotidae	Striphnopteryginae				Janomima			mariana		westwoodi	Aurivillius	1902		2017-04-28
Eupterotidae	Striphnopteryginae				Lichenopteryx						Felder, C. & Felder, R.	1874	-	2017-04-28
Eupterotidae	Striphnopteryginae				Lichenopteryx			despecta			Felder, C. & Felder, R.	1874	Y	2017-04-28
Eupterotidae	Striphnopteryginae				Lichenopteryx			scotina			Hering	1932		2017-04-28
Eupterotidae	Striphnopteryginae				Marmaroplegma						Wallengren	1860	-	2017-04-28
Eupterotidae	Striphnopteryginae				Marmaroplegma			conspersa			Aurivillius	1921		2017-04-28
Eupterotidae	Striphnopteryginae				Marmaroplegma			parargada			Wallengren	1860	Y	2017-04-28
Eupterotidae	Striphnopteryginae				Marmaroplegma			parargada		clio	Fawcett	19??		04/28/2017
Eupterotidae	Striphnopteryginae				Marmaroplegma			unicolor			Janse	1915		2017-04-28
Eupterotidae	Striphnopteryginae				Papuapterote						Nässig & Oberprieler	2008	-	2017-04-28
Eupterotidae	Striphnopteryginae				Papuapterote			crenulata			Joicey & Talbot	1916	N	2017-04-28
Eupterotidae	Striphnopteryginae				Papuapterote			punctata			Joicey & Talbot	1916	N	2017-04-28
Eupterotidae	Striphnopteryginae				Papuapterote			styx			Bethune-Baker	1909	N	2017-04-28
Eupterotidae	Striphnopteryginae				Paraphyllalia						Gaede	1927	-	2017-04-28
Eupterotidae	Striphnopteryginae				Paraphyllalia			degenera			Walker	1855	N	2017-04-28
Eupterotidae	Striphnopteryginae				Phiala						Wallengren	1860	-	2017-04-28
Eupterotidae	Striphnopteryginae				Phiala		Heteromorpha				Herrich-Schäffer	[1855]	-	2017-07-04	Junior homonym
Eupterotidae	Striphnopteryginae				Phiala			alba			Aurivillius	1895		2017-04-28
Eupterotidae	Striphnopteryginae				Phiala			alba		pagagna	Strand	1911		2017-04-28
Eupterotidae	Striphnopteryginae				Phiala			alba		strigifera	Strand	1911		2017-04-28
Eupterotidae	Striphnopteryginae				Phiala			albidorsata			Gaede	1928		2017-04-28
Eupterotidae	Striphnopteryginae				Phiala			atomaria			Holland	1892		2017-04-28
Eupterotidae	Striphnopteryginae				Phiala			aurivillii			Bethune-Baker	19??		04/28/2017
Eupterotidae	Striphnopteryginae				Phiala			bamenda			Strand	1911		2017-04-28
Eupterotidae	Striphnopteryginae				Phiala			bergeri			Rougeot	1975		2017-04-28
Eupterotidae	Striphnopteryginae				Phiala			bistrigata			Aurivillius	1901		2017-04-28
Eupterotidae	Striphnopteryginae				Phiala			bistrigata		curvistriga	Strand	1911		2017-04-28
Eupterotidae	Striphnopteryginae				Phiala			costipuncta			Herrich-Schäffer	1855		2017-04-28
Eupterotidae	Striphnopteryginae				Phiala			costipuncta		angola	Strand	1911		2017-05-19	infrasubspecific
Eupterotidae	Striphnopteryginae				Phiala			costipuncta		atomaria	Walker	1855		2017-04-28
Eupterotidae	Striphnopteryginae				Phiala			costipuncta		ochritincta	Strand	1911		2017-05-19	infrasubspecific
Eupterotidae	Striphnopteryginae				Phiala			costipuncta		punctilinea	Walker	1862		2017-04-28
Eupterotidae	Striphnopteryginae				Phiala			costipuncta		xanthosoma	Wallengren	1860		2017-04-28
Eupterotidae	Striphnopteryginae				Phiala			crassistriga			Strand	1911		2017-04-28
Eupterotidae	Striphnopteryginae				Phiala			crassistriga		incurva	Aurivillius	18??		04/28/2017
Eupterotidae	Striphnopteryginae				Phiala			cubicularis			Strand	1911		2017-04-28
Eupterotidae	Striphnopteryginae				Phiala			dasypoda			Wallengren	1860		2017-04-28
Eupterotidae	Striphnopteryginae				Phiala			difficilis			Strand	1911		2017-04-28
Eupterotidae	Striphnopteryginae				Phiala			esomelana			Bethune-Baker	1927		2017-04-28
Eupterotidae	Striphnopteryginae				Phiala			flavina			Gaede	1927		2017-04-28
Eupterotidae	Striphnopteryginae				Phiala			flavipennis			Wallengren	1875		2017-04-28
Eupterotidae	Striphnopteryginae				Phiala			fuscodorsata			Aurivillius	1904		2017-04-28
Eupterotidae	Striphnopteryginae				Phiala			hologramma			Aurivillius	1904		2017-04-28
Eupterotidae	Striphnopteryginae				Phiala			incana			Distant	1897		2017-04-28
Eupterotidae	Striphnopteryginae				Phiala			incana		arrecta	Distant	1899		2017-04-28
Eupterotidae	Striphnopteryginae				Phiala			infuscata			Grünberg	1907		2017-04-28
Eupterotidae	Striphnopteryginae				Phiala			iridescens			Bouyer	2014		2017-04-28
Eupterotidae	Striphnopteryginae				Phiala			longilinea			Berio	1939		2017-04-28
Eupterotidae	Striphnopteryginae				Phiala			marshalli			Aurivillius	1904		2017-04-28
Eupterotidae	Striphnopteryginae				Phiala			marshalli		reussi	Strand	1911		2017-04-28
Eupterotidae	Striphnopteryginae				Phiala			maxima			Kühne	2007		2017-04-28
Eupterotidae	Striphnopteryginae				Phiala			nigrolineata			Aurivillius	1903		2017-04-28
Eupterotidae	Striphnopteryginae				Phiala			nigrolineata		chrysargyra	Wichgraf	1914		2017-04-28
Eupterotidae	Striphnopteryginae				Phiala			nigrolineata		nigrovenata	Bethune-Baker	19??		04/28/2017
Eupterotidae	Striphnopteryginae				Phiala			nigrolineata		ochrescens	Gaede	1927		2017-04-28
Eupterotidae	Striphnopteryginae				Phiala			nigrolineata		rubrivena	Hampson	1910		2017-04-28
Eupterotidae	Striphnopteryginae				Phiala			niveociliata			Strand	1911		2017-04-28
Eupterotidae	Striphnopteryginae				Phiala			novemlineata			Aurivillius	1911		2017-04-28
Eupterotidae	Striphnopteryginae				Phiala			occidentalis			Bouyer	2012		2017-04-28
Eupterotidae	Striphnopteryginae				Phiala			odites			Schaus	1893		2017-04-28
Eupterotidae	Striphnopteryginae				Phiala			parabiota			Kühne	2007		2017-04-28
Eupterotidae	Striphnopteryginae				Phiala			polita			Distant	1897		2017-04-28
Eupterotidae	Striphnopteryginae				Phiala			postmedialis			Strand	1911		2017-04-28
Eupterotidae	Striphnopteryginae				Phiala			pretoriana			Wichgraf	1908		2017-04-28
Eupterotidae	Striphnopteryginae				Phiala			pseudatomaria			Strand	1911		2017-04-28
Eupterotidae	Striphnopteryginae				Phiala			pseudatomaria		sigyna	Aurivillius	1893		2017-04-28
Eupterotidae	Striphnopteryginae				Phiala			pseudatomaria		sublimbalis	Strand	1911		2017-04-28
Eupterotidae	Striphnopteryginae				Phiala			pulverea			Distant	1903		2017-04-28
Eupterotidae	Striphnopteryginae				Phiala			punctulata			Pagenstecher	1903		2017-04-28
Eupterotidae	Striphnopteryginae				Phiala			punctulata		nyassana	Strand	19??		04/28/2017
Eupterotidae	Striphnopteryginae				Phiala			sabalina			Rebel	1914		2017-04-28
Eupterotidae	Striphnopteryginae				Phiala			similis			Aurivillius	1911		2017-04-28
Eupterotidae	Striphnopteryginae				Phiala			simplex			Aurivillius	1904		2017-04-28
Eupterotidae	Striphnopteryginae				Phiala			specialis			Kühne	2007		2017-04-28
Eupterotidae	Striphnopteryginae				Phiala			subiridescens			Holland	1893		2017-04-28
Eupterotidae	Striphnopteryginae				Phiala			subochracea			Strand	1911		2017-04-28
Eupterotidae	Striphnopteryginae				Phiala			sylvia			Druce	18??		04/28/2017
Eupterotidae	Striphnopteryginae				Phiala			tanganyikae			Strand	1911		2017-04-28
Eupterotidae	Striphnopteryginae				Phiala			ueleae			Kühne	2007		2017-04-28
Eupterotidae	Striphnopteryginae				Phiala			uelleburgensis			Strand	1912		2017-04-28
Eupterotidae	Striphnopteryginae				Phiala			unistriga			Gaede	1927		2017-04-28
Eupterotidae	Striphnopteryginae				Phiala			venusta			Walker	1865		2017-04-28
Eupterotidae	Striphnopteryginae				Phiala			venusta		angulata	Gaede	1927		2017-05-19	infrasubspecific
Eupterotidae	Striphnopteryginae				Phiala			wichgrafi			Strand	1911		2017-04-28
Eupterotidae	Striphnopteryginae				Phyllalia						Walker	1855	-	2017-04-28
Eupterotidae	Striphnopteryginae				Phyllalia		Homochroa				Wallengren	1858	-	2017-06-12	junior homonym
Eupterotidae	Striphnopteryginae				Phyllalia			alboradiata			Aurivillius	1911		2017-04-28
Eupterotidae	Striphnopteryginae				Phyllalia			alboradiata		acuta	Strand	1911		2017-04-28
Eupterotidae	Striphnopteryginae				Phyllalia			flavicostata			Fawcett	1903		2017-04-28
Eupterotidae	Striphnopteryginae				Phyllalia			patens			Boisduval	1847	N	2017-04-28
Eupterotidae	Striphnopteryginae				Phyllalia			patens		concolor	Walker	1855		2017-04-28
Eupterotidae	Striphnopteryginae				Phyllalia			patens		ochrina	Strand	1911		2017-05-19	infrasubspecific
Eupterotidae	Striphnopteryginae				Phyllalia			thunbergii			Boisduval	1847		2017-04-28
Eupterotidae	Striphnopteryginae				Phyllalia			thunbergii		incerta	Walker	1855		2017-04-28
Eupterotidae	Striphnopteryginae				Phyllalia			umbripennis			Strand	1911		2017-04-28
Eupterotidae	Striphnopteryginae				Phyllalia			valida			Felder, C. & Felder, R.	1874		2017-04-28
Eupterotidae	Striphnopteryginae				Phyllalia			ziczac			Strand	1911		2017-04-28
Eupterotidae	Striphnopteryginae				Rhabdosia						Hübner	[1820]	-	2017-04-28
Eupterotidae	Striphnopteryginae				Rhabdosia			patagiata			Aurivillius	1911		2017-04-28
Eupterotidae	Striphnopteryginae				Rhabdosia			vaninia			Stoll	1781	N	2017-04-28
Eupterotidae	Striphnopteryginae				Schistissa						Aurivillius	1901	-	2017-04-28
Eupterotidae	Striphnopteryginae				Schistissa			uniformis			Aurivillius	1901	Y	2017-04-28
Eupterotidae	Striphnopteryginae				Striphnopteryx						Wallengren	1858	-	2017-04-28
Eupterotidae	Striphnopteryginae				Striphnopteryx			edulis			Boisduval	1847	N	2017-04-28
Eupterotidae	Striphnopteryginae				Teratojana						Hering	1937	-	2017-04-28
Eupterotidae	Striphnopteryginae				Teratojana			flavina			Hering	1937	Y	2017-04-28
Eupterotidae	Striphnopteryginae				Trichophiala						Aurivillius	1879	-	2017-04-28
Eupterotidae	Striphnopteryginae				Trichophiala			devylderi			Aurivillius	1879	Y	2017-04-28
Phiditiidae											Minet	1994	-	04/28/2017
Phiditiidae					Phiditia						Möschler	1882	-	2017-04-28
Phiditiidae					Phiditia			cuprea			Kaye	1901	N	2017-04-28
Phiditiidae					Phiditia			diores			Cramer	1775	N	2017-04-28
Phiditiidae					Phiditia			lucernaria			Walker	1866	N	2017-04-28
Phiditiidae					Phiditia			maculosa			Dognin	1916	N	2017-04-28
Phiditiidae					Phiditia			maculosissima			Dognin	1916	N	2017-04-28
Phiditiidae					Phiditia			minor			Schaus	1924	Y	2017-04-28
Phiditiidae					Phiditia			scriptigera			Dognin	1916	N	2017-04-28
Phiditiidae					Phiditia			scriptigera		johanna	Schaus	1920	N	2017-04-28
Phiditiidae					Rolepa						Walker	1855	-	2017-04-28
Phiditiidae					Rolepa		Athrula				Walker	1862	-	2017-04-28
Phiditiidae					Rolepa		Olenoptera				Herrich-Schäffer	1855	-	2017-05-18	nomen nudum
Phiditiidae					Rolepa		Olenoptera				Herrich-Schäffer	[1856]	-	2017-04-28
Phiditiidae					Rolepa			castrona			Schaus	1920	Y	2017-04-28
Phiditiidae					Rolepa			delineata			Walker	1855	Y	2017-04-28
Phiditiidae					Rolepa			delineata		flavilimbata	Herrich-Schäffer	[1856]	N	2017-04-28
Phiditiidae					Rolepa			delineata		saturnioides	Walker	1862	N	2017-04-28
Phiditiidae					Rolepa			demerara			Schaus	1927	Y	2017-04-28
Phiditiidae					Rolepa			erica			Schaus	1927	Y	2017-04-28
Phiditiidae					Rolepa			fiachna			Schaus	1927	Y	2017-04-28
Phiditiidae					Rolepa			innotabilis			Walker	1865	N	2017-04-28
Phiditiidae					Rolepa			lojana			Dognin	1916	Y	2017-04-28
Phiditiidae					Rolepa			marginepicta			Dognin	1914	Y	2017-04-28
Phiditiidae					Rolepa			medina			Dognin	1916	N	2017-04-28
Phiditiidae					Rolepa			nigrostriga			Schaus	1920	Y	2017-04-28
Phiditiidae					Rolepa			nigrostriga		lamothei	Beutelspacher-Baigts	1984	N	2017-04-28
Phiditiidae					Rolepa			sicyata			Dognin	1901	N	2017-04-28
Phiditiidae					Rolepa			unimoda			Dognin	1923	N	2017-04-28
Phiditiidae					Sorocaba						Moore	1882	-	2017-04-28
Phiditiidae					Sorocaba		Ceratophora				Guenée	1858	-	2017-04-28
Phiditiidae					Sorocaba			carmelitaria			Guenée	1857	N	2017-04-28
Phiditiidae					Sorocaba			carmelitaria		anomala	Moore	1882	Y	2017-04-28
Phiditiidae					Tepilia						Walker	1855	-	2017-04-28
Phiditiidae					Tepilia		Coryphyala				Herrich-Schäffer	1855	-	2017-04-28
Phiditiidae					Tepilia		Phecada				Walker	1856	-	2017-04-28
Phiditiidae					Tepilia			biluna			Walker	1855	Y	2017-04-28
Phiditiidae					Tepilia			biluna		confinis	Walker	1856	N	2017-04-28
Phiditiidae					Tepilia			biluna		orbigera	Herrich-Schäffer	[1856]	N	2017-04-28
Phiditiidae					Tepilia			dodala			Schaus	1927	N	2017-04-28
Phiditiidae					Tepilia			fastidiosa			Dognin	1901	N	2017-04-28
Phiditiidae					Tepilia			fastidiosa		joanna	Schaus	1906	N	2017-04-28
Saturniidae											Boisduval	[1837]	-	2017-04-28
Saturniidae	Agliinae										Packard	1893	-	2017-04-28
Saturniidae	Agliinae				Aglia						Ochsenheimer	1810	-	2017-04-28
Saturniidae	Agliinae				Aglia		Echidna				Hübner	[1806	-	2017-04-28
Saturniidae	Agliinae				Aglia		Tachyptena				Germar	1810	-	2017-04-28
Saturniidae	Agliinae				Aglia			homora			Jordan	1911	Y	2017-04-28
Saturniidae	Agliinae				Aglia			homora		ingens	Naumann, Brosch & Nässig	2003	Y	2017-04-28
Saturniidae	Agliinae				Aglia			japonica			Leech	[1889]	Y	2017-04-28
Saturniidae	Agliinae				Aglia			japonica	microtau		Inoue	1958	Y	2017-04-28
Saturniidae	Agliinae				Aglia			sinyaevi			Brechlin	2015	Y	2017-04-28
Saturniidae	Agliinae				Aglia			tau			Linnaeus	1758	N	2017-04-28
Saturniidae	Agliinae				Aglia			tau		amurensis	Jordan	1911	Y	2017-04-28
Saturniidae	Agliinae				Aglia			tau		androides	Heinrich	1917	Y	2017-06-06	infrasubspecific
Saturniidae	Agliinae				Aglia			tau		anthrax	Standfuss	1910	Y	2017-09-13	infrasubspecific
Saturniidae	Agliinae				Aglia			tau		brunnea	Lempke	1960	Y	2017-06-06	infrasubspecific
Saturniidae	Agliinae				Aglia			tau		brunnescens	Brittinger	1851	Y	2017-12-09	Infrasubspecific
Saturniidae	Agliinae				Aglia			tau		caeca	Prack	1950	Y	2017-06-06	infrasubspecific
Saturniidae	Agliinae				Aglia			tau		caecata	Schultz	1903	Y	2017-06-06	infrasubspecific
Saturniidae	Agliinae				Aglia			tau		cerberus	Schultz	1905	Y	2017-06-06	infrasubspecific
Saturniidae	Agliinae				Aglia			tau		cerretanica	Rougeot	1965	Y	2017-04-28
Saturniidae	Agliinae				Aglia			tau		confluens	Schultz	1905	Y	2017-06-06	infrasubspecific
Saturniidae	Agliinae				Aglia			tau		cupreola	Werner	1902	Y	2017-06-06	infrasubspecific
Saturniidae	Agliinae				Aglia			tau		cuspidata	von Linstow	1913	Y	2017-10-23	infrasubspecific
Saturniidae	Agliinae				Aglia			tau		dealbata	Günner	1908	Y	2017-06-06	infrasubspecific
Saturniidae	Agliinae				Aglia			tau		decaeruleata	Schultz	1905	Y	2017-06-06	infrasubspecific
Saturniidae	Agliinae				Aglia			tau		decolor	Schultz	1905	Y	2017-06-06	infrasubspecific
Saturniidae	Agliinae				Aglia			tau		defasciata	Pöschmann	1928	Y	2017-06-06	infrasubspecific
Saturniidae	Agliinae				Aglia			tau		eumense	Gómez-Bustillo & Fernández-Vidal	1980	Y	2017-04-28
Saturniidae	Agliinae				Aglia			tau		extrema	Rummel	1929	Y	2017-06-06	infrasubspecific
Saturniidae	Agliinae				Aglia			tau		ferecaeca	Oberthür	1909	Y	2017-06-06	infrasubspecific
Saturniidae	Agliinae				Aglia			tau		ferenigra	Thierry-Mieg	1884	Y	2017-12-09	infrasubspecific
Saturniidae	Agliinae				Aglia			tau		flavorosea	Kardakoff	1928	Y	2017-06-06	infrasubspecific
Saturniidae	Agliinae				Aglia			tau		flexilis	Schultz	1905	Y	2017-06-06	infrasubspecific
Saturniidae	Agliinae				Aglia			tau		hauderi	Schultz	1908	Y	2017-06-06	infrasubspecific
Saturniidae	Agliinae				Aglia			tau		hemitaenia	Schawerda	1924	Y	2017-06-06	infrasubspecific
Saturniidae	Agliinae				Aglia			tau		huemeri-ferenigra	Kunz	1912	Y	2017-06-06	infrasubspecific
Saturniidae	Agliinae				Aglia			tau		huemeri-nigerrima	Gödecke	1923	Y	2017-06-06	infrasubspecific
Saturniidae	Agliinae				Aglia			tau		huemeri-weismanni	Standfuss	1914	Y	2017-06-06	infrasubspecific
Saturniidae	Agliinae				Aglia			tau		hüttneri	Stichel	1907	Y	2017-06-06	infrasubspecific
Saturniidae	Agliinae				Aglia			tau		impulverea	Nitsche	1910	Y	2017-06-06	infrasubspecific
Saturniidae	Agliinae				Aglia			tau		inornata	Mezger	1935	Y	2017-06-06	infrasubspecific
Saturniidae	Agliinae				Aglia			tau		juangabrielis	Gómez-Bustillo & Fernández-Vidal	1980	Y	2017-06-06	infrasubspecific
Saturniidae	Agliinae				Aglia			tau		locuples	Schultz	1905	Y	2017-06-06	infrasubspecific
Saturniidae	Agliinae				Aglia			tau		lugens	Standfuss	1888	Y	2017-06-06	infrasubspecific
Saturniidae	Agliinae				Aglia			tau		luteola	Standfuss	1914	Y	2017-06-06	infrasubspecific
Saturniidae	Agliinae				Aglia			tau		macropis	Lenz	1925	Y	2017-10-23	infrasubspecific
Saturniidae	Agliinae				Aglia			tau		magna	Bang-Haas	1919	Y	2017-10-11	nomen nudum
Saturniidae	Agliinae				Aglia			tau		mascolor	Klemensiewicz	1907	Y	2017-12-11	Infrasubspecific
Saturniidae	Agliinae				Aglia			tau		melaina	Gross	1897	Y	2017-06-06	infrasubspecific
Saturniidae	Agliinae				Aglia			tau		nana	Bang-Haas, A.	1919	Y	2017-09-13	infrasubspecific
Saturniidae	Agliinae				Aglia			tau		nigerrima	Standfuss	1910	Y	2017-09-13	infrasubspecific
Saturniidae	Agliinae				Aglia			tau		nigrescens	Bergmann	1953	Y	2017-06-06	infrasubspecific
Saturniidae	Agliinae				Aglia			tau		nigromarginata	Kunz	1912	Y	2017-06-06	infrasubspecific
Saturniidae	Agliinae				Aglia			tau		oblongomaculata	Schultz	1905	Y	2017-06-06	infrasubspecific
Saturniidae	Agliinae				Aglia			tau		obsoleta	Lambillion	1907	Y	2017-06-06	infrasubspecific
Saturniidae	Agliinae				Aglia			tau		parvocellata	Lempke	1960	Y	2017-06-06	infrasubspecific
Saturniidae	Agliinae				Aglia			tau		privata	Schultz	1905	Y	2017-06-06	infrasubspecific
Saturniidae	Agliinae				Aglia			tau		pseudomelaina	Priess	1930	Y	2017-10-30	infrasubspecific
Saturniidae	Agliinae				Aglia			tau		quadrangularis	Schultz	1903	Y	2017-06-06	infrasubspecific
Saturniidae	Agliinae				Aglia			tau		radiata	Lenz	1925	Y	2017-06-06	infrasubspecific
Saturniidae	Agliinae				Aglia			tau		roseotincta	Schultz	1905	Y	2017-06-06	infrasubspecific
Saturniidae	Agliinae				Aglia			tau		rubella	Standfuss	1914	Y	2017-06-06	infrasubspecific
Saturniidae	Agliinae				Aglia			tau		sajana	Bang-Haas, O.	1919	Y	2017-08-10	Nomen nudum
Saturniidae	Agliinae				Aglia			tau		spaniolissima	Gómez-Bustillo & Gómez de Aizpurua	1980	Y	2017-10-23
Saturniidae	Agliinae				Aglia			tau		standfussi	Schüssler	1936	Y	2017-10-10	Infrasubspecific
Saturniidae	Agliinae				Aglia			tau		strigulata	Hoffmann	1916	Y	2017-06-06	infrasubspecific
Saturniidae	Agliinae				Aglia			tau		subcaeca	Strand	1903	Y	2017-09-13	infrasubspecific
Saturniidae	Agliinae				Aglia			tau		tauus	Haworth	1803	Y	2017-09-27	unjustified emendation
Saturniidae	Agliinae				Aglia			tau		typica	Standfuss	1914	Y	2017-06-06	infrasubspecific
Saturniidae	Agliinae				Aglia			tau		uniformis	Oberthür	1909	Y	2017-06-06	infrasubspecific
Saturniidae	Agliinae				Aglia			tau		weismanni	Standfuss	1910	Y	2017-09-13	infrasubspecific
Saturniidae	Agliinae				Aglia			vanschaycki			Brechlin	2015	Y	2017-04-28
Saturniidae	Arsenurinae										Jordan	1922	-	2017-04-28
Saturniidae	Arsenurinae	Almeidaiini									Lemaire	1980	-	2017-04-28
Saturniidae	Arsenurinae	Almeidaiini			Almeidaia						Travassos	1937	-	2017-04-28
Saturniidae	Arsenurinae	Almeidaiini			Almeidaia			aidae			Mielke & Casagrande	1981	Y	2017-04-28
Saturniidae	Arsenurinae	Almeidaiini			Almeidaia			romualdoi			Travassos	1937	Y	2017-04-28
Saturniidae	Arsenurinae	Arsenurini									Jordan	1922	-	2017-04-28
Saturniidae	Arsenurinae	Arsenurini		Dysdaemoniinae							Travassos & Noronha	1968	-	2017-04-28
Saturniidae	Arsenurinae	Arsenurini		Rhescyntidinae							Brues, Melander & Carpenter	1954	-	2017-06-12	junior homonym
Saturniidae	Arsenurinae	Arsenurini		Rhescyntinae							Bouvier	1930	-	2017-04-28
Saturniidae	Arsenurinae	Arsenurini			Arsenura						Duncan [& Westwood]	1841	-	2017-04-28
Saturniidae	Arsenurinae	Arsenurini			Arsenura		Aricia				Herrich-Schäffer	[1853]	-	2017-08-06
Saturniidae	Arsenurinae	Arsenurini			Arsenura			albopicta			Jordan	1922	Y	2017-04-28
Saturniidae	Arsenurinae	Arsenurini			Arsenura			altocymonia			Brechlin & Meister	2010	Y	2017-04-28
Saturniidae	Arsenurinae	Arsenurini			Arsenura			amacymonia			Brechlin & Meister	2011	Y	2017-04-28
Saturniidae	Arsenurinae	Arsenurini			Arsenura			angulatus			Bouvier	1924	Y	2017-04-28
Saturniidae	Arsenurinae	Arsenurini			Arsenura			archianassa			Draudt	1930	Y	2017-04-28
Saturniidae	Arsenurinae	Arsenurini			Arsenura			archianassa	porioni		Lemaire	1980	Y	2017-04-28
Saturniidae	Arsenurinae	Arsenurini			Arsenura			arianae			Brechlin & Meister	2010	Y	2017-04-28
Saturniidae	Arsenurinae	Arsenurini			Arsenura			armida			Cramer	1779	N	2017-04-28
Saturniidae	Arsenurinae	Arsenurini			Arsenura			armida		cassandra	Cramer	1779	N	2017-04-28
Saturniidae	Arsenurinae	Arsenurini			Arsenura			armida		erythrinae	Fabricius	1781	N	2017-04-28
Saturniidae	Arsenurinae	Arsenurini			Arsenura			aspasia			Herrich-Schäffer	[1853]	N	2017-04-28
Saturniidae	Arsenurinae	Arsenurini			Arsenura			batesii			Felder, C. & Felder, R.	1874	N	2017-04-28
Saturniidae	Arsenurinae	Arsenurini			Arsenura			batesii		crenulata	Schaus	1921	Y	2017-04-28
Saturniidae	Arsenurinae	Arsenurini			Arsenura			batesii	arcaei		Druce	1886	Y	2017-04-28
Saturniidae	Arsenurinae	Arsenurini			Arsenura			batesii	aurantiaca		Lemaire	1976	Y	2017-04-28
Saturniidae	Arsenurinae	Arsenurini			Arsenura			batesii	gadoui		Lemaire	1980	Y	2017-04-28
Saturniidae	Arsenurinae	Arsenurini			Arsenura			beebei			Fleming	1945	N	2017-04-28
Saturniidae	Arsenurinae	Arsenurini			Arsenura			biundulata			Schaus	1906	Y	2017-04-28
Saturniidae	Arsenurinae	Arsenurini			Arsenura			centrocymonia			Brechlin & Meister	2011	Y	2017-04-28
Saturniidae	Arsenurinae	Arsenurini			Arsenura			ciocolatina			Draudt	1930	Y	2017-04-28
Saturniidae	Arsenurinae	Arsenurini			Arsenura			cymonia			Rothschild	1907	N	2017-04-28
Saturniidae	Arsenurinae	Arsenurini			Arsenura			delormei			Bouvier	1929	Y	2017-09-11
Saturniidae	Arsenurinae	Arsenurini			Arsenura			drucei			Schaus	1906	Y	2017-04-28
Saturniidae	Arsenurinae	Arsenurini			Arsenura			fauvetyi			Guérin-Méneville	1864	N	2017-08-06	nomen oblitum
Saturniidae	Arsenurinae	Arsenurini			Arsenura			fuscata			Brechlin & Meister	2010	Y	2017-04-28
Saturniidae	Arsenurinae	Arsenurini			Arsenura			giuglarisi			Bénéluz	2009	Y	2017-04-28
Saturniidae	Arsenurinae	Arsenurini			Arsenura			jennettae			Wolfe, Conlan & Kelly	2000	Y	2017-04-28
Saturniidae	Arsenurinae	Arsenurini			Arsenura			kaechi			Brechlin & Meister	2010	Y	2017-04-28
Saturniidae	Arsenurinae	Arsenurini			Arsenura			meander			Walker	1855	N	2017-04-28
Saturniidae	Arsenurinae	Arsenurini			Arsenura			mossi			Jordan	1922	Y	2017-04-28
Saturniidae	Arsenurinae	Arsenurini			Arsenura			orbignyana			Guérin-Méneville	[1844]	N	2017-04-28
Saturniidae	Arsenurinae	Arsenurini			Arsenura			orbignyana		dorbignyana	Bouvier	1924	Y	2017-04-28
Saturniidae	Arsenurinae	Arsenurini			Arsenura			pandora			Klug	1836	Y	2017-04-28
Saturniidae	Arsenurinae	Arsenurini			Arsenura			paraorbignyana			Brechlin & Meister	2010	Y	2017-04-28
Saturniidae	Arsenurinae	Arsenurini			Arsenura			peggyae			Brechlin & Meister	2013	Y	2017-04-28
Saturniidae	Arsenurinae	Arsenurini			Arsenura			polyodonta			Jordan	1911	N	2017-04-28
Saturniidae	Arsenurinae	Arsenurini			Arsenura			ponderosa			Rothschild	1895	Y	2017-04-28
Saturniidae	Arsenurinae	Arsenurini			Arsenura			ponderosa	guianensis		Rothschild	1907	N	2017-04-28
Saturniidae	Arsenurinae	Arsenurini			Arsenura			ponderosa	yungasensis		Brechlin & Meister	2010	Y	2017-04-28
Saturniidae	Arsenurinae	Arsenurini			Arsenura			rebeli			Gschwandner	1920	Y	2017-04-28
Saturniidae	Arsenurinae	Arsenurini			Arsenura			rebeli		oweni	Schaus	1921	Y	2017-04-28
Saturniidae	Arsenurinae	Arsenurini			Arsenura			sylla			Cramer	1779	N	2017-04-28
Saturniidae	Arsenurinae	Arsenurini			Arsenura			sylla		pelias	Jordan	1911	N	2017-04-28
Saturniidae	Arsenurinae	Arsenurini			Arsenura			sylla	hercules		Walker	1855	N	2017-04-28
Saturniidae	Arsenurinae	Arsenurini			Arsenura			sylla	maranhensis		Brechlin & Meister	2013	Y	2017-04-28
Saturniidae	Arsenurinae	Arsenurini			Arsenura			sylla	niepelti		Schüssler	1936	N	2017-04-28
Saturniidae	Arsenurinae	Arsenurini			Arsenura			sylla	winbrechlini		Brechlin & Meister	2010	Y	2017-04-28
Saturniidae	Arsenurinae	Arsenurini			Arsenura			thomsoni			Schaus	1906	Y	2017-04-28
Saturniidae	Arsenurinae	Arsenurini			Arsenura			thomsoni	lemairei		Racheli & Racheli	1998	Y	2017-04-28
Saturniidae	Arsenurinae	Arsenurini			Arsenura			xanthopus			Walker	1855	N	2017-04-28
Saturniidae	Arsenurinae	Arsenurini			Arsenura			xanthopus		alcmene	Draudt	1930	Y	2017-09-14
Saturniidae	Arsenurinae	Arsenurini			Arsenura			xanthopus		paranensis	Schüssler	1936	N	2017-04-28
Saturniidae	Arsenurinae	Arsenurini			Arsenura			yungascymonia			Brechlin & Meister	2010	Y	2017-04-28
Saturniidae	Arsenurinae	Arsenurini			Caio						Travassos & Noronha	1968	-	2017-04-28
Saturniidae	Arsenurinae	Arsenurini			Caio			championi			Druce	1886	N	2017-04-28
Saturniidae	Arsenurinae	Arsenurini			Caio			championi		columbiana	Rothschild	1907	N	2017-04-28
Saturniidae	Arsenurinae	Arsenurini			Caio			championi		undilinea	Schaus	1921	N	2017-04-28
Saturniidae	Arsenurinae	Arsenurini			Caio			chiapasiana			Brechlin & Meister	2010	Y	2017-04-28
Saturniidae	Arsenurinae	Arsenurini			Caio			harrietae			Forbes	1944	N	2017-04-28
Saturniidae	Arsenurinae	Arsenurini			Caio			hidalgensis			Brechlin & Meister	2010	Y	2017-04-28
Saturniidae	Arsenurinae	Arsenurini			Caio			richardsoni			Druce	1890	N	2017-04-28
Saturniidae	Arsenurinae	Arsenurini			Caio			richardsoni		extrema	Beutelspacher	1986	Y	2017-06-05	infrasubspecific
Saturniidae	Arsenurinae	Arsenurini			Caio			richardsoni		mestiza	Draudt	1930	N	2017-04-28
Saturniidae	Arsenurinae	Arsenurini			Caio			romulus			Maassen	1869	N	2017-04-28
Saturniidae	Arsenurinae	Arsenurini			Caio			romulus		brasiliensis	Zikán	1941	N	2017-04-28
Saturniidae	Arsenurinae	Arsenurini			Caio			witti			Brechlin & Meister	2010	Y	2017-04-28
Saturniidae	Arsenurinae	Arsenurini			Copiopteryx						Duncan [& Westwood]	1841	-	2017-04-28
Saturniidae	Arsenurinae	Arsenurini			Copiopteryx			cleopatra			Girard	1885	N	2017-04-28	nomen nudum
Saturniidae	Arsenurinae	Arsenurini			Copiopteryx			derceto			Maassen	[1872]	N	2017-04-28
Saturniidae	Arsenurinae	Arsenurini			Copiopteryx			imperialis			Girard	1885	N	2017-04-28	nomen nudum
Saturniidae	Arsenurinae	Arsenurini			Copiopteryx			jehovah			Strecker	1874	N	2017-04-28
Saturniidae	Arsenurinae	Arsenurini			Copiopteryx			jehovah		adaheli	Draudt	1930	Y	2017-04-28
Saturniidae	Arsenurinae	Arsenurini			Copiopteryx			semiramis			Cramer	1775	N	2017-04-28
Saturniidae	Arsenurinae	Arsenurini			Copiopteryx			semiramis		igoryi	Gagárin	1934	Y	2017-04-28
Saturniidae	Arsenurinae	Arsenurini			Copiopteryx			semiramis	andensis		Lemaire	1974	N	2017-04-28
Saturniidae	Arsenurinae	Arsenurini			Copiopteryx			semiramis	banghaasi		Draudt	1930	Y	2017-04-28
Saturniidae	Arsenurinae	Arsenurini			Copiopteryx			semiramis	gadouorum		Lemaire	1971	Y	2017-04-28
Saturniidae	Arsenurinae	Arsenurini			Copiopteryx			semiramis	montei		Gagárin	1934	Y	2017-04-28
Saturniidae	Arsenurinae	Arsenurini			Copiopteryx			semiramis	montei	travassosi	May	1934	Y	2017-04-28
Saturniidae	Arsenurinae	Arsenurini			Copiopteryx			semiramis	phoenix		Deyrolle	1869	N	2017-04-28
Saturniidae	Arsenurinae	Arsenurini			Copiopteryx			semiramis	phoenix	phoenix	Maassen	1869	N	2017-09-19	junior homonym
Saturniidae	Arsenurinae	Arsenurini			Copiopteryx			semiramis	steindachneri		Fassl	1917	Y	2017-04-28
Saturniidae	Arsenurinae	Arsenurini			Copiopteryx			sonthonnaxi			André	1905	Y	2017-04-28
Saturniidae	Arsenurinae	Arsenurini			Copiopteryx			sonthonnaxi		phippsi	Schaus	1932	Y	2017-04-28
Saturniidae	Arsenurinae	Arsenurini			Copiopteryx			virgo			Zikán	1929	Y	2017-04-28
Saturniidae	Arsenurinae	Arsenurini			Copiopteryx			virgo		biedermanni	Kotzsch	1930	Y	2017-04-28
Saturniidae	Arsenurinae	Arsenurini			Dysdaemonia						Hübner	[1819]	-	2017-04-28
Saturniidae	Arsenurinae	Arsenurini			Dysdaemonia			australoboreas			Brechlin & Meister	2009	Y	2017-04-28
Saturniidae	Arsenurinae	Arsenurini			Dysdaemonia			boreas			Cramer	1775	N	2017-04-28
Saturniidae	Arsenurinae	Arsenurini			Dysdaemonia			boreas		auster	Felder, C. & Felder, R.	1874	N	2017-04-28
Saturniidae	Arsenurinae	Arsenurini			Dysdaemonia			brasiliensis			Rothschild	1907	Y	2017-04-28
Saturniidae	Arsenurinae	Arsenurini			Dysdaemonia			concisa			Becker	2001	Y	2017-04-28
Saturniidae	Arsenurinae	Arsenurini			Dysdaemonia			fosteri			Rothschild	1906	Y	2017-04-28
Saturniidae	Arsenurinae	Arsenurini			Dysdaemonia			fosteri		amabilis	Orfila	1935	Y	2017-04-28
Saturniidae	Arsenurinae	Arsenurini			Dysdaemonia			fosteri		angustata	Breyer	1933	Y	2017-06-05	infrasubspecific
Saturniidae	Arsenurinae	Arsenurini			Dysdaemonia			fosteri		angustata	Breyer	1933	Y	2017-06-05	infrasubspecific
Saturniidae	Arsenurinae	Arsenurini			Dysdaemonia			fosteri		angustata	Breyer	1933	Y	2017-06-05	infrasubspecific
Saturniidae	Arsenurinae	Arsenurini			Dysdaemonia			fosteri		concolor	Orfila	1935	Y	2017-10-31	infrasubspecific
Saturniidae	Arsenurinae	Arsenurini			Dysdaemonia			fosteri		cortesi	Giacomelli	1925	Y	2017-04-28
Saturniidae	Arsenurinae	Arsenurini			Dysdaemonia			fosteri		cortesi-fasciata	John	1928	Y	2017-06-05	infrasubspecific
Saturniidae	Arsenurinae	Arsenurini			Dysdaemonia			fosteri		decolorata	Orfila	1935	Y	2017-06-05	infrasubspecific
Saturniidae	Arsenurinae	Arsenurini			Dysdaemonia			fosteri		fasciata	John	1928	Y	2017-05-30	infrasubspecific
Saturniidae	Arsenurinae	Arsenurini			Dysdaemonia			fosteri		fasciata	Breyer	1933	Y	2017-05-30	infrasubspecific
Saturniidae	Arsenurinae	Arsenurini			Dysdaemonia			fosteri		fasciata	Breyer	1933	Y	2017-05-30	infrasubspecific
Saturniidae	Arsenurinae	Arsenurini			Dysdaemonia			fosteri		fasciata	Breyer	1933	Y	2017-05-30	infrasubspecific
Saturniidae	Arsenurinae	Arsenurini			Dysdaemonia			fosteri		fulva	Breyer	1933	Y	2017-06-05	infrasubspecific
Saturniidae	Arsenurinae	Arsenurini			Dysdaemonia			fosteri		fulvescens	Orfila	1935	Y	2017-06-05	infrasubspecific
Saturniidae	Arsenurinae	Arsenurini			Dysdaemonia			fosteri		fusca	Breyer	1933	Y	2017-06-05	infrasubspecific
Saturniidae	Arsenurinae	Arsenurini			Dysdaemonia			fosteri		grisea	Breyer	1933	Y	2017-06-05	infrasubspecific
Saturniidae	Arsenurinae	Arsenurini			Dysdaemonia			fosteri		inexpectata	Orfila	1935	Y	2017-06-05	infrasubspecific
[truncated: 10,160 more rows]
